# Supplementary material
Source: publisher figshare collection journal article supplement (https://springernature.figshare.com/ndownloader/files/14136674)
Supplement: Supplementary file 1 [file 14136674]

## Sheet: README
Additional File 3
Tab	Description
"Excluded"	List of literature excluded at full text screening with reasons
"Included"	List of literature included at full text screening

## Sheet: Excluded
Authors	Title	Year	Reviewer	Reason	Extracted
Abbot J I O; Mace R ;	Managing protected woodlands: fuelwood collection and law enforcement in Lake Malawi National Park	2001	SHC	No outcome	EXCLUDED
Abebe T ; Bongers F ;	Land-use dynamics in enset-based agroforestry homegardens in Ethiopia	2012	PR, SHC	No comparisons	EXCLUDED
Abeli W S; Maximillian J R; Kweka A E; Shemwetta D T. K;	Socio-economic impact of ox skidding project to the surrounding villages of Mount Meru forest plantations, northern Tanzania	2003	PR, SHC	No comparisons	EXCLUDED
Abtew Asmamaw Alemu; Pretzsch Juergen ; Mohmoud Tarig El-Sheikh; Adam Yahia Omar;	Commodity Chain of Frankincense from the Dry Woodlands of Nuba Mountains, South Kordofan State, Sudan	2012	SHC, KM	Study design	EXCLUDED
Abu Sin ; M E ; El Sammani ; M O ;	Community perception and participation, prospects in management of forests in marginal lands of Sudan - A case study of Rawashda and Wad Kabu forests - North Gedaref Rural Council - Eastern Region	1987	SHC, KM, PR	Outcome, perceptions	EXCLUDED
Acharya Krishna P;	Improving the Effectiveness of Collective Action : Sharing Experiences from Community Forestry in	2006	SHC, KM	No outcome	EXCLUDED
Acharya RP ; Bhattarai BP ; Dahal N ; Kunwar RM ; Karki G ; Bhattarai HP ;	Governance in community forestry in Nepal through forest certification	2015	PR, SHC	No comparisons	EXCLUDED
Acharya RP ; Dahal S ; Kunwar RM ; Sharma R ; Baral S ;	Medicinal and aromatic plants in Far Western Nepal: a sustainable livelihood framework analysis	2015	PR, SHC	No comparisons	EXCLUDED
Adams C ; da Motta ; R ; Ortiz R A; Reid J ; Ebersbach Aznar ; C ; de Almeida Sinisgalli ; P A ;	The use of contingent valuation for evaluating protected areas in the developing world: Economic valuation of Morro do Diabo State Park, Atlantic Rainforest, S{ã}o Paulo State (Brazil)	2008	SHC	Adoption of methods	EXCLUDED
Adams W M; Aveling R ; Brockington D ; Dickson B ; Elliott J ; Hutton J ; Roe D ; Vira B ; Wolmer W ;	Biodiversity conservation and the eradication of poverty	2004	SHC	Study design	EXCLUDED
Addinsall C ; Glencross K ; Rihai N ; Kalomor L ; Palmer G ; Nichols D ; Smith G ;	Enhancing agroforestry in Vanuatu: striking the balance between individual entrepreneurship and community development	2016	SHC	Narrative	EXCLUDED
Aderounmu A F; Ladipo D O; Adebisi A A; Adewusi H G; Oyeleke G O;	Nigeria chewstick species; diminishing non-timber forest resources with immense commercial potential	2002	SHC		CANNOT LOCATE
Adhikari B ; Williams F ; Lovett J C;	Local benefits from community forests in the middle hills of Nepal	2007	PR, SHC	No comparisons	EXCLUDED
Adhikari Bhim ; Baig Saima Pervaiz; Iftikhar Usman Ali;	The Use and Management of Mangrove Ecosystems in Pakistan	2010	SHC, KM	No outcome	EXCLUDED
Agarwal B ;	Environmental action, gender equity and women's participation	1997	KM, SHC	Study design, evidence	EXCLUDED
Agarwal B ;	Participatory exclusions, community forestry, and gender: An analysis for South Asia and a conceptual framework	2001	KM, SHC	Study design, evidence	EXCLUDED
Agarwal B ;	Gender and forest conservation: the impact of women's participation in community forest governance	2009	KM, SHC	Human impacts, environmental outcomes	EXCLUDED
Agarwal B ;	``Bargaining'' and gender relations: within and beyond the household	1997	SHC	Study topic	EXCLUDED
Agarwal Bina ;	Toward Participatory Inclusion: A Gender Analysis of Community Forestry in South Asia	2008	SHC	Evidence	EXCLUDED
Agarwal Bina ;	Violations and Penalties	2010	SHC	No outcome	EXCLUDED
Agarwal Bina ;	From Exclusion to Empowered Engagement	2010	SHC	NO ACCESS	NO ACCESS
Agbogidi O M; Ofuoku A U;	Biodiversity conservation and poverty alleviation in the Niger Delta area of Nigeria	2006	KM	Study topic, study design, potential outcomes	EXCLUDED
Agea J G; Obua J ; Fungo B ;	Efficacy of forestry conservation policy on rural livelihoods in Uganda: Evidence from Mabira forest reserve	2009	PR, SHC	No comparisons	EXCLUDED
Agrawal A ; Gibson C C;	Enchantment and disenchantment: the role of community in natural resource conservation	1999	SHC	Study design	EXCLUDED
Agrawal Arun ;	The Regulatory Community: Decentralization and the Environment in the Van Panchayats (Forest Councils) of Kumaon, India	2001	SHC	Narrative case study	EXCLUDED
Agrawal Arun ; Yadama Gautam ; Louis St ; Andrade Raul ; Bhattacharya Ajoy ; Service Indian Forest;	Decentralization and Environmental Conservation: Gender Effects from Participation in Joint Forest Management	2006	KM	Environmental outcomes	EXCLUDED
Agrawal B ;	Chapter 9: Shortages admidst growing plenty		SHC	Other	EXCLUDED
Aguilar Francisco X;	Investment preferences for wood-based energy initiatives in the US	2009	KM	Study topic	EXCLUDED
Agurto Adrianzén ; Marcos ;	Improved cooking stoves and firewood consumption: Quasi-experimental evidence from the Northern Peruvian Andes	2013	KM	Subsistence, human impacts on environment	EXCLUDED
Aheto DW ; Kankam S ; Okyere I ; Mensah E ; Osman A ; Jonah FE ; Mensah JC ;	Community-based mangrove forest management: Implications for local livelihoods and coastal resource conservation along the Volta estuary catchment area of Ghana	2016	PR, SHC	No comparisons	EXCLUDED
Ahmed S ; Stepp J R; Toleno R A. J; Peters C M;	Increased market integration, value, and ecological knowledge of tea agroforests in the Akha highlands of Southwest China	2010	SHC	Perceptions	EXCLUDED
Ajayi O C; Akinnifesi F K; Sileshi G ; Kanjipite W ;	Labour inputs and financial profitability of conventional and agroforestry-based soil fertility management practices in Zambia	2009	PR, SHC	No comparisons	EXCLUDED
Akamani K ; Hall TE ;	Determinants of the process and outcomes of household participation in collaborative forest management in Ghana: A quantitative test of a community resilience model	2015	PR, SHC	No comparisons	EXCLUDED
Alelign A ; Yemshaw Y ; Teketay D ; Edwards S ;	Socio-economic factors affecting sustainable utilization of woody species in zegie peninsula, northwestern ethiopia	2011	PR, SHC	No comparisons	EXCLUDED
Alexander S J; Oswalt S N; Emery M R;	Nontimber forest products in the united states: Montreal process indicators as measures of current conditions and sustainability	2011	SHC, SA	Not discrete human population	EXCLUDED
Alix-Garcia J ; de Janvry ; A ; Sadoulet E ;	A tale of two communities: Explaining deforestation in Mexico	2005	SHC, SA	No outcome	EXCLUDED
Alix-Garcia Jennifer ; McIntosh Craig ; Sims Katharine R E; Welch Jarrod R;	The Ecological Footprint of Poverty Alleviation: Evidence from Mexico's Oportunidades Program	2013	SHC	Environmental outcomes	EXCLUDED
Alkan H ; Korkmaz M ; McGill D W; Eker M ;	Conflicts in benefits from sustainable natural resource management: Two diverse examples from Turkey	2010	SHC	Perceptions of intervention	EXCLUDED
Almudi T ; Berkes F ;	Barriers to empowerment: Fighting eviction for conservation in a southern Brazilian protected area	2010	SHC	Study topic	EXCLUDED
Altrichter Mariana ;	Wildlife in the life of local people of the semi-arid Argentine Chaco	2006	SHC	Daily use	EXCLUDED
Ambrose-Oji B ;	The contribution of NTFPs to the livelihoods of the 'forest poor': evidence from the tropical forest zone of south-west Cameroon	2003	SHC	No intervention	EXCLUDED
Ameha A ; Larsen HO ; Lemenih M ;	Participatory Forest Management in Ethiopia: Learning from Pilot Projects	2014	PR, SHC	No comparisons	EXCLUDED
Amoah M ; Wiafe E D;	Livelihoods of fringe communities and the impacts on the management of conservation area: the case of Kakum National Park in Ghana	2012	SHC	Excluded comparators	EXCLUDED
Anderson Emily K; Zerriffi Hisham ;	Seeing the trees for the carbon: agroforestry for development and carbon mitigation	2012	KM	Study design	EXCLUDED
Anderson J ; Mehta S ; Epelu E ; Cohen B ;	Managing leftovers: Does community forestry increase secure and equitable access to valuable resources for the rural poor?	2015	KM	Study design	EXCLUDED
Andersson E ; Lidestav G ;	Creating alternative spaces and articulating needs: Challenging gendered notions of forestry and forest ownership through women's networks	2016	KM	Study topic	EXCLUDED
Andersson Krister ;	Local Governance of Forests and the Role of External Organizations: Some Ties Matter More Than Others	2013	KM	Preferences	EXCLUDED
Andersson Krister ; Gibson Clark C;	Decentralized governance and environmental change: Local institutional moderation of deforestation in Bolivia	2007	SHC	Environmental outcomes	EXCLUDED
Angelstam P ; Elbakidze M ; Axelsson R ; Dixelius M ; Tornblom J ;	Knowledge Production and Learning for Sustainable Landscapes: Seven Steps Using Social-Ecological Systems as Laboratories	2013	PR, SHC	Qualitative data	EXCLUDED
Anthony B P; Bellinger E G;	Importance value of landscapes, flora and fauna to Tsonga communities in the rural areas of Limpopo province, South Africa	2007	PR, SHC	No comparisons	EXCLUDED
Antinori C ;	Community forest enterprises as entrepreneurial firms: Economic and institutional perspectives from Mexico	2005	KM	Study design	EXCLUDED
Anup KC ; Koirala I ; Adhikari N ;	Cost-Benefit Analysis of a Community Forest in Nepal	2015	SHC	No comparison	EXCLUDED
Aoudji Augustin K N; Adegbidi Anselme ; Agbo Valentin ; Atindogbe Gilbert ; Toyi Mireille S S; Yevide Armand S I; Ganglo Jean C; Lebailly Philippe ;	Functioning of farm-grown timber value chains: Lessons from the smallholder-produced teak (Tectona grandis L.f.) poles value chain in Southern Benin	2012	SHC	No outcome	EXCLUDED
Apesteguia J ; Azmat G ; Iriberri N ;	The impact of gender composition on team performance and decision making: evidence from the field	2012	KM	Study topic	EXCLUDED
Appiah M ;	Co-partnership in forest management: The Gwira-Banso joint forest management project in Ghana	2001	PR, SHC	No comparisons	EXCLUDED
Appiah M ; Pappinen A ;	Farm Forestry Prospects Among Some Local Communities in Rachuonyo District, Kenya	2010	PR, SHC	No comparisons	EXCLUDED
Appiah Mark ; Blay Dominic ; Damnyag Lawrence ; Dwomoh Francis K; Pappinen Ari ; Luukkanen Olavi ;	Dependence on forest resources and tropical deforestation in Ghana	2009	SHC, SA	Daily use	EXCLUDED
Appiah-Opoku Seth ;	Using Protected Areas as a Tool for Biodiversity Conservation and Ecotourism: A Case Study of Kakum National Park in Ghana	2011	SHC, SA	Narrative case study	EXCLUDED
Aradhana Singh ;	Non-timber forest products: a substitute for livelihood of the marginal community in Himalayan zone of Uttarakhand	2009	SHC	Documenting use	EXCLUDED
Archabald K ; Naughton-Treves L ;	Tourism revenue-sharing around national parks in Western Uganda: early efforts to identify and reward local communities	2001	KM	Perceptions	EXCLUDED
Armesto J J; Smith-Ramírez C ; Rozzi R ;	Conservation strategies for biodiversity and indigeneous people in Chilean forest ecosystems	2001	SHC	Study design	EXCLUDED
Arnold J E M; Kohlin G ; Persson R ;	Woodfuels, livelihoods, and policy interventions: Changing perspectives	2006	SHC	Study design	EXCLUDED
Arriagada Rodrigo Antonio;	Private provision of public goods: applying matching methods to evaluate payments for ecosystem services in Costa Rica	2008	SHC	Environmental outcomes	EXCLUDED
Asefa S ; Workneh Negatu ; Mogues T ;	Combating food insecurity and rural poverty in Ethiopia	2012	SHC	REVIEW	EXCLUDED
Asfaw A ; Lemenih M ; Kassa H ; Ewnetu Z ;	Importance, determinants and gender dimensions of forest income in eastern highlands of Ethiopia: The case of communities around Jelo Afromontane forest	2013	PR, SHC	No comparisons	EXCLUDED
Ashish Alex ; Vidyasagaran K ; Geethakutty P S;	Gender dimensions in NTFP collection among the indigenous communities of Western Ghats of India	2016	SHC	No intervention	EXCLUDED
Asquith N M; Vargas Ríos ; M T ; Smith J ;	Can forest-protection carbon projects improve rural livelihoods? Analysis of the Noel Kempff Mercado Climate Action Project, Bolivia	2002	PR, SHC	No comparisons	EXCLUDED
Astier M ; Speelman E N; Lopez-Ridaura S ; Masera O R; Gonzalez-Esquivel C E;	Sustainability indicators, alternative strategies and trade-offs in peasant agroecosystems: analysing 15 case studies from Latin America	2011	SHC	REVIEW	EXCLUDED
Astuti R ; McGregor A ;	Governing carbon, transforming forest politics: A case study of Indonesia's REDD plus Task Force	2015	KM	Study design	EXCLUDED
Atela JO ; Quinn CH ; Minang PA ; Duguma LA ; Houdet JA ;	Implementing REDD plus at the national level: Stakeholder engagement and policy coherences between REDD plus rules and Kenya's sectoral policies	2016	KM	Study design	EXCLUDED
Auch E ; Pretzsch J ; Uibrig H ;	Organizational Changes in Forest Management	2014	SHC	Study design	EXCLUDED
Awang Noor ; A G ; Norini H ; Khamurudin M N; Ahmad Ainuddin ; N ; Ismariah A ;	Valuing the rain forest: The economic values of selected forest goods and services in ayer hitam forest reserve, Puchong, Selangor	2007	PR, SHC	No comparisons	EXCLUDED
Awotide Olawale D; Kehinde Adetunji L; Agbola Peter O;	Poverty and rural livelihood diversification among farming households in southwest Nigeria	2010	KM	Study topic, intervention	EXCLUDED
Aziz Sheema A; Clements Gopalasamy R; Rayan D M; Sankar Preetha ;	Why conservationists should be concerned about natural resource legislation affecting indigenous peoples' rights: lessons from Peninsular Malaysia	2013	SHC	Potential outcomes	EXCLUDED
Babalola F D;	A review of the significance of non-timber forest products to rural livelihoods in Nigeria	2011	SHC	REVIEW	EXCLUDED
Babili IH ; Mtalo E ; Kajembe GC ; van der Wal H ;	Institutional Change and Institutional Performance Under Decentralized Forest Management in Babati District, Tanzania	2015	KM	Evidence	EXCLUDED
Babin D ; Bertrand A ;	Managing pluralism: subsidiarity and patrimonial mediation	1998	SHC	No outcome	EXCLUDED
Babu S C; Kataki P K;	Food systems approach for sustainable nutrition security: A synthesis and way forward	2002	SHC	Study design	EXCLUDED
Babulo B ; Muys B ; Nega F ; Tollens E ; Nyssen J ; Deckers J ; Mathijs E ;	The economic contribution of forest resource use to rural livelihoods in Tigray, Northern Ethiopia	2009	PR, SHC	No comparisons	EXCLUDED
Bacon C M; Getz C ; Kraus S ; Montenegro M ; Holland K ;	The social dimensions of sustainability and change in diversified farming systems	2012	PR, SHC	No comparisons	EXCLUDED
Bacon Christopher M; Ernesto Méndez ; V ; Gómez María Eugenia Flores; Stuart Douglas ; Flores Sandro Raúl Díaz;	Are Sustainable Coffee Certifications Enough to Secure Farmer Livelihoods? The Millenium Development Goals and Nicaragua's Fair Trade Cooperatives	2008	SHC	Excluded comparators	EXCLUDED
Badola R ;	People and protected areas in India	1999	SHC	Study topic	EXCLUDED
Baez Stephanie ;	The "Right" REDD Framework: National Laws and Best Protect Indigenous Rights in a Global REDD Regime	2011	SHC	Study design	EXCLUDED
Baird Ian G; Dearden Philip ;	Biodiversity Conservation and Resource Tenure Regimes: A Case Study from Northeast Cambodia	2003	MCM	Qualitative data	EXCLUDED
Baiyegunhi LJS ; Oppong BB ;	Commercialisation of mopane worm (Imbrasia belina) in rural households in Limpopo Province, South Africa	2016	SHC	No outcome	EXCLUDED
Bajracharya Siddhartha B; Furley Peter A; Newton Adrian C;	Impacts of community-based conservation on local communities in the annapurna conservation area, nepal	2006	KM	Evidence	EXCLUDED
Baker Julia ; Milner-Gulland E J; Leader-Williams Nigel ;	Park Gazettement and Integrated Conservation and Development as Factors in Community Conflict at Bwindi Impenetrable Forest, Uganda	2012	SHC	Study topic	EXCLUDED
Balick M J; Arvigo R ; Shropshire G ; Walker J ; Campbell D ; Romero L ;	The Belize Ethnobotany Project: safeguarding medicinal plants and traditional knowledge in Belize	2002	SHC	NO ACCESS	NO ACCESS
Balick M J; O'Brien H ;	Ethnobotanical research in Belize: accomplishments, challenges and lessons learned	2005	SHC	No outcome	EXCLUDED
Ball AA ; Brancalion PHS ;	Governance challenges for commercial exploitation of a non-timber forest product by marginalized rural communities	2016	SHC	Evidence	EXCLUDED
Ball J B; Braatz S ; Chandrasekharan C ;	It starts with F, and that stands for food	1995	SHC	Study design	EXCLUDED
Ballard H L; Fernandez-Gimenez M E; Sturtevant V E;	Integration of local ecological knowledge and conventional science: A study of seven community-based forestry organizations in the USA	2008	PR	Study design	EXCLUDED
Balooni K ; Pulhin J M; Inoue M ;	The effectiveness of decentralisation reforms in the Philippines's forestry sector	2008	SHC	Study design	EXCLUDED
Banana Abwoli Y; Gombya-Ssembajjwe William ; Bahati Joseph ;	DECENTRALIZATION OF FORESTRY RESOURCES IN UGANDA: REALITIES OR RHETORIC?		SHC	No outcome	EXCLUDED
Bandyopadhyay Sushenjit ; Shyamsundar Priya ; Baccini Alessandro ;	Forests, Biomass Use and Poverty in Malawi Draft Background Paper for the Malawi Poverty Assessment	2006	KM	Subsistence	EXCLUDED
Bandyopadhyay Sushenjit ; Shyamsundar Priya ; Bandyopadhyay Priya ; Sushenjit Shyamsundar ;	Fuelwood Consumption and Participation in Community Forestry in India	2004	KM	Subsistence	EXCLUDED
Banjade M R; Ojha H ;	Facilitating deliberative governance: Innovations from Nepal's community forestry program - a case study in Karmapunya	2005	KM	Study topic, evidence	EXCLUDED
Baral N ; Heinen J T;	Decentralization and people's participation in conservation: A comparative study from the Western Terai of Nepal	2007	MCM	Target group	EXCLUDED
Baral Nabin ; Stern Marc J;	Capital Stocks and Organizational Resilience in the Annapurna Conservation Area, Nepal	2011	JE	No comparisons	EXCLUDED
Barany M ; Hammett A L; Sene A ; Amichev B ;	Nontimber forest benefits and HIV/AIDS in sub-Saharan Africa	2001	SHC	Study design	EXCLUDED
BARBIER E B;	ECONOMIC-ASPECTS OF TROPICAL DEFORESTATION IN SOUTHEAST-ASIA	1993	SHC	No outcome	EXCLUDED
Barbier E B; Tesfaw A T;	Can REDD+ save the forest? The role of payments and tenure	2012	KM	Study design	EXCLUDED
Barbier Edward B; Tesfaw Anteneh T;	Tenure Constraints and Carbon Forestry in Africa	2013	KM	Study design	EXCLUDED
Barham Bradford L; Takasaki Yoshito ; Coomes Oliver T;	Rain Forest Livelihoods: Income Generation, Household Weath and Forest Use	1999	KM	Subsistence	EXCLUDED
Barkmann Jan ; Burkard Guenter ; Faust Heiko ; Fremerey Michael ; Koch Sebastian ; Lanini Agus ;	Land tenure rights, village institutions, and rainforest conversion in Central Sulawesi (Indonesia)	2010	SHC	No comparision	EXCLUDED
Barrera V ; Cruz E ; Alwang J ; Escudero L ; Monar C ;	Experiences in integrated management of natural resources in the sub-watershed of the Chimbo River, Ecuador	2010	KM	Study topic	EXCLUDED
Barrow E G. C;	Evaluating the effectiveness of participatory agroforestry extension programmes in a pastoral system, based on existing traditional values - A case study of the Turkana in Kenya	1991	KM	Study design	EXCLUDED
Barsimantov James A;	Vicious and Virtuous Cycles and the Role of External Non-government Actors in Community Forestry in Oaxaca and Michoacan, Mexico	2010	SHC	No comparisons	EXCLUDED
Bassullu C ; Tolunay A ;	Analysis on traditional homegarden involving animals practices and its importance classification of usage purposes in rural areas of Isparta Region of Turkey	2010	SHC	Study design	EXCLUDED
Basuki I ; Sheil D ; Padmanaba M ; Liswanti N ; Mulcahy G ; Wan M ;	The evolving role of tropical forests for local livelihoods in Indonesia	2011	SHC	Other	EXCLUDED
Baumert S ; Luz AC ; Fisher J ; Vollmer F ; Ryan CM ; Patenaude G ; Zorrilla-Miras P ; Artur L ; Nhantumbo I ; Macqueen D ;	Charcoal supply chains from Mabalane to Maputo: Who benefits?	2016	SHC	No comparisons	EXCLUDED
Baumgartner U ; Kell S ; Nguyen TH ;	Arbitrary mangrove-to-water ratios imposed on shrimp farmers in Vietnam contradict with the aims of sustainable forest management	2016	SHC	Adoption of methods	EXCLUDED
Bawa Kamaljit S; Joseph Gladwin ; Setty Siddappa ;	Poverty, biodiversity and institutions in forest-agriculture ecotones in the Western Ghats and Eastern Himalaya ranges of India	2007	JE, KM	Narrative case study	EXCLUDED
Beauchamp E ; Ingram V ;	Impacts of community forests on livelihoods in Cameroon: lessons from two case studies	2011	MCM, SHC	Projected returns	EXCLUDED
Bebbington A ; Kopp A ;	Networking and rural development through sustainable forest management: frameworks for pluralistic approaches	1998	SHC	Study design	EXCLUDED
Becker C Dustin; Agreda Ana ; Astudillo Evelyng ; Costantino Melina ; Torres Pascual ;	Community-based monitoring of fog capture and biodiversity at Loma Alta, Ecuador enhance social capital and institutional cooperation	2005	MCM	Qualitative data	EXCLUDED
Bedunah D J; Schmidt S M;	Pastoralism and protected area management in Mongolia's Gobi Gurvansaikhan National Park	2004	SHC	Study topic	EXCLUDED
Behera B ;	Institutional dynamics and natural resource management: A study of JFM in Andhra Pradesh	2008	JE, KM	No outcome	EXCLUDED
Behera Bhagirath ;	Explaining the performance of state-community joint forest management in India	2009	JE, SHC	No outcomes	EXCLUDED
Bekele T ; Ango TG ;	Do Interventions from Participatory Action Research Improve Livelihood and Reduce Conflicts Over Forest Resources? A Case Study from South Central Ethiopia	2015	SHC	Perceived outcomes	EXCLUDED
Belcher B ; Ruíz-Pérez M ; Achdiawan R ;	Global patterns and trends in the use and management of commercial NTFPs: Implications for livelihoods and conservation	2005	SHC	No comparison	EXCLUDED
Belem M ; Bayala J ; Kalinganire A ;	Defining the poor by the rural communities of Burkina Faso: Implications for the development of sustainable parkland management	2011	SHC	No intervention	EXCLUDED
Belsky J M;	Household food security, farm trees, and agroforestry: a comparative study in Indonesia and the Philippines	1993	SHC	Adoption of methods	EXCLUDED
Benjamin Akompab Ebainjuiayuk;	Women in community forestry organizations: An empirical study in Thailand	2010	MCM	Qualitative data only	EXCLUDED
Benjamin Charles E;	Legal Pluralism and Decentralization: Natural Resource Management in Mali	2008	SHC	Study design	EXCLUDED
Benjamin Karyne ; Bouchard Andre ; Domon Gerald ;	Managing abandoned farmland: The need to link biological and sociological aspects	2008	SHC	Adoption of methods	EXCLUDED
Benner J ; Lertzman K ; Pinkerton EW ;	Social contracts and community forestry: how can we design forest policies and tenure arrangements to generate local benefits?	2014	SHC	Perception of intervention	EXCLUDED
Berkes F ;	Community conserved areas: policy issues in historic and contemporary context	2009	SHC	No outcome	EXCLUDED
Bertin T ; Ann D ; Zacharie T ; Ebenezar A ; Alain T ;	Enhancing farmers access to quality planting materials through community-based seed and seedling systems: Experiences from the western highlands of cameroon	2012	SHC	Narrative case study	EXCLUDED
Bertzky B ; Corrigan C ; Kemsey J ; Kenney S ; Ravilious C C B; Burgess N ;	Protected Planet Report 2012: Tracking progress towards global targets for protected areas	2012	SHC	Target group	EXCLUDED
Bertzky Monika ; Bomhard Bastian ;	Key Challenges in Forest Protected Area Management	2010	SHC	Study design	EXCLUDED
Bhandari AR ; Uibrig H ;	Who is benefiting more from common property forest resources: poor or less poor?	2009	SHC	No comparison	EXCLUDED
Bhatia A ;	Participatory forest management (PFM): Rediscovery of a promising mechanism for poverty alleviation in the mountain areas of South Asia	2000	SHC	No comparison	EXCLUDED
Bhattacharya A K; Basnyat B ;	Empowering people through Joint Forest Management: A study from Madhya Pradesh (India)	2003	SHC	No comparison	EXCLUDED
Bhattacharya P ; Bhaskar Mittra ;	Madhya Pradesh case study: the healing touch. Sustainable medicinal plants conservation in the JFM areas	2001	SHC	CANNOT LOCATE	CANNOT LOCATE
Bhattacharya P ; Hayat S F;	Sustainable NTFP management for rural development: a case from Madhya Pradesh, India	2004	SHC	No outcome	EXCLUDED
Bhumibhamon S ;	Forest and poverty alleviation in Thailand	2005	SHC	Study design	EXCLUDED
Bieri M ; Nygren A ;	The challenges of certifying tropical community forests: A case study from honduras	2011	SHC	No outcome	EXCLUDED
BirdLife International ;	Empowering the Grassroots - BirdLife, Participation, and Local Communities	2011	SHC	Study design	EXCLUDED
Blay Dominic ; Appiah Mark ; Damnyag Lawrence ; Dwomoh Francis K; Luukkanen Olavi ; Pappinen Ari ;	Involving local farmers in rehabilitation of degraded tropical forests: some lessons from Ghana	2008	JE	No comparisons	EXCLUDED
Bluffstone Randy ; Robinson Elizabeth ; Guthiga Paul ;	REDD plus and community-controlled forests in low-income countries: Any hope for a linkage?	2013	SHC	Study design	EXCLUDED
Blume A ;	Women and the economy of forest agriculture: examining different projects in Tanzania Frauen und Agroforstwirtschaft. Untersuchungen verschiedener Projekte in Tanzania	1998	SHC	CANNOT LOCATE	CANNOT LOCATE
Boaz O ; Boaz A ;	The economic aspects of Agave americana: A case study of its sustainable management by a tribal co-operative society in Jagdalpur district of Chhattisgarh, India	2003	SHC	No comparison	EXCLUDED
Bohringer A ; Ayuk E T; Katanga R ; Ruvuga S ;	Farmer nurseries as a catalyst for developing sustainable land use systems in southern Africa. Part A: Nursery productivity and organization	2003	SHC	No comparison	EXCLUDED
Bonaiuto M ; Carrus G ; Martorella H ; Bonnes M ;	Local identity processes and environmental attitudes in land use changes: The case of natural protected areas	2002	SHC	Perceptions	EXCLUDED
Bond A C;	Contextual analysis of agroforestry adoption in the buffer zone of podocarpus national park, Ecuador	2009	SHC	No outcome	EXCLUDED
Booth C A; Fullen M A; Booth C A; Fullen M A; Sarsby R W; Davies K ; Kurgan R ; Bhattacharyya R ; Poesen J ; Smets T ; Kertesz A ; Toth A ; Szalai Z ; Jakab G ; Kozma K ; Jankauskas B ; Trimirka V ; Jankauskiene G ; Buehmann C ; Paterson G ; Mulibana E ; Nell J P; van der Merwe ; G M E; Guerra A J T; Mendonca J K S; Guerra T T; Sathler R ; Yi Z ; Yongmei L ; Panomtarachichigul M ; Peukrai S ; Thu…	The BORASSUS Project: aims, o Ject ves and preliminary insights into the environmental and socio-economic contribution of biogeotextiles to sustainable development and soil conservation	2007	SHC	No outcome	EXCLUDED
Borchert H ; Benker K ;	The economic situation of forest contractors in Bavaria	2015	SHC	No outcome	EXCLUDED
Borrini-Feyerabend G ; Dudley N ; Jaeger T ; Lassen B ; Broome N P; Phillips A ;	Governance of protected areas: from understanding to action. Best practice protected area guidelines series 20	2013	SHC	Study design	EXCLUDED
Bose P ;	Forest tenure reform: exclusion of tribal women's rights in semi-arid Rajasthan, India	2011	JE	No comparisons	EXCLUDED
Bosma R ; Sidik A S; van Zwieten ; P ; Aditya A ; Visser L ;	Challenges of a transition to a sustainably managed shrimp culture agro-ecosystem in the Mahakam delta, East Kalimantan, Indonesia	2012	SHC	Subsistence	EXCLUDED
Bostrom M ;	The problernatic social dimension of sustainable development: the case of the Forest Stewardship Council	2012	SHC	Target group	EXCLUDED
Botha J ; Witkowski E T F; Cock J ;	Commercial viability of conservation and social forestry outreach nurseries in South Africa	2007	SHC	Narrative case study	EXCLUDED
Bottazzi P ; Cattaneo A ; Rocha D C; Rist S ;	Assessing sustainable forest management under REDD+: A community-based labour perspective	2013	SHC	Modeling	EXCLUDED
Bouda Henri-Noel ; Savadogo Patrice ; Tiveau Daniel ; Ouedraogo Boureima ;	State, Forest and Community: Challenges of Democratically Decentralizing Forest Management in the Centre-West Region of Burkina Faso	2011	SHC	Study design	EXCLUDED
Bourgoin Jeremy ; Castella Jean-Christophe ; Hett Cornelia ; Lestrelin Guillaume ; Heinimann Andreas ;	Engaging Local Communities in Low Emissions Land-Use Planning: a Case Study from Laos	2013	SHC	Potential outcomes	EXCLUDED
Boyd Emily ; May Peter ; Chang Manyu ; Veiga Fernando C;	Exploring socioeconomic impacts of forest based mitigation projects: Lessons from Brazil and Bolivia	2007	MCM	Qualitative data	EXCLUDED
Boyd R ; Doroodian K ;	The economic impact of a subsidy on Mexican grains and forestry: A CGE analysis	1998	KM	CANNOT LOCATE	CANNOT LOCATE
Bozmoski A S; Hultman N E;	Participant perceptions of risk and benefit in carbon forestry: Evidence from Central Tanzania	2010	MCM	Qualitative data	EXCLUDED
Bradshaw B ;	Questioning the credibility and capacity of community-based resource management	2003	SHC	Not forest	EXCLUDED
Braedt O ; Standa-Gunda W ;	Woodcraft markets in Zimbabwe	2000	SHC	No outcome	EXCLUDED
Brännlund R ; Sidibe A ; Gong P ;	Participation to forest conservation in National Kabore Tambi Park in Southern Burkina Faso	2009	JE	No comparisons	EXCLUDED
Brashares Justin S; Golden Christopher D; Weinbaum Karen Z; Barrett Christopher B; Okello Grace V;	Economic and geographic drivers of wildlife consumption in rural Africa.	2011	SHC	Study topic	EXCLUDED
Bray D B; Antinori C ; Torres-Rojo J M;	The Mexican model of community forest management: The role of agrarian policy, forest policy and entrepreneurial organization	2006	SHC	Narrative case study	EXCLUDED
Bray D B; Duran E ; Ramos V H; Mas J F; Velazquez A ; McNab R B; Barry D M; Radachowsky J ;	Tropical Deforestation, Community Forests, and Protected Areas in the Maya Forest	2008	SHC	No outcome	EXCLUDED
Bray D B; Merino-Perez L ; Negreros-Castillo P ; Segura-Warnholtz G ; Torres-Rojo J M; Vester H F. M;	Mexico's community-managed forests as a global model for sustainable landscapes	2003	SHC	No outcome	EXCLUDED
Bremer LL ; Farley KA ; Lopez-Carr D ; Romero J ;	Conservation and livelihood outcomes of payment for ecosystem services in the Ecuadorian Andes: What is the potential for 'win-win'?	2014	SHC	Narrative case study	EXCLUDED
Brennan M A; Luloff A E; Finley J C;	Building sustainable communities in forested regions	2005	SHC	Study design	EXCLUDED
Brighton D ;	Incorporating social equity in conservation programmes in the northeastern US	2009	SHC	Narrative case study	EXCLUDED
Brockington D ; Igoe J ; SCHMIDT‒SOLTAU K ;	Conservation, human rights, and poverty reduction	2006	SHC	Study topic	EXCLUDED
Brockington Dan ;	Forests, community conservation, and local government performance: The village forest reserves of Tanzania	2007	SHC	Qualitative data	EXCLUDED
Brooks Jeremy S; Tshering Doley ;	A respected central government and other obstacles to community-based management of the matsutake mushroom in Bhutan	2010	SHC	No comparison	EXCLUDED
Brooks Jeremy S; Waylen Kerry A; Mulder Monique Borgerhoff;	How national context, project design, and local community characteristics influence success in community-based conservation projects	2012	SHC	Already covered in Brooks et al. 2013	EXCLUDED
Broussard S R; Jones S B; Nielsen L A; Flanagan C A;	Forest stewardship education - Fostering positive attitudes in urban youth	2001	SHC	Study topic	EXCLUDED
Browder J O; Pedlowski M A;	Agroforestry performance on small farms in Amazonia: Findings from the Rondonia agroforestry pilot project	2000	SHC	Performance	EXCLUDED
Brown Douglas R; Dettmann Paul ; Rinaudo Tony ; Tefera Hailu ; Tofu Assefa ;	Poverty Alleviation and Environmental Restoration Using the Clean Development Mechanism: A Case Study from Humbo, Ethiopia	2011	SHC	Qualitative data only	EXCLUDED
Brown K ; Corbera E ;	Exploring equity and sustainable development in the new carbon economy	2003	SHC	Study design	EXCLUDED
Brown Kerry A; Flynn Dan F. B; Abram Nicola K; Ingram J Carter; Johnson Steig E; Wright Patricia ;	Assessing Natural Resource Use by Forest-Reliant Communities in Madagascar Using Functional Diversity and Functional Redundancy Metrics	2011	SHC	No outcome	EXCLUDED
Bruyere B L; Beh A W; Lelengula G ;	Differences in perceptions of communication, tourism benefits, and management issues in a protected area of rural Kenya	2009	SHC	Qualitative data only	EXCLUDED
Bryan J A;	New symbiosis for forest care: A trial of forest action research in the Atlantic Forest of Brazil	2009	SHC	Study design	EXCLUDED
Buchy M ; Rai B ;	Do women-only approaches to natural resource management help women? The case of community forestry in nepal	2007	SHC	CANNOT LOCATE	CANNOT LOCATE
Budhathoki Prabhu ;	Linking communities with conservation in developing countries: buffer zone management initiatives in Nepal	2004	SHC	Study design	EXCLUDED
Buffum Bill ;	Why is There No Tragedy in These Commons? An Analysis of Forest User Groups and Forest Policy in Bhutan	2012	SHC	No comparator	EXCLUDED
Burgin S ; Zama EF ;	Community-Based Tourism - Option for Forest-Dependent Communities in 1A IUCN Protected Areas? Cameroon Case Study	2014	SHC	No comparator	EXCLUDED
Büscher B E; Mutimukuru T ;	Buzzing too far? The ideological echo of global governance concepts on the local level: The case of the Mafungautsi Forest in Zimbabwe	2007	SHC	Evidence	EXCLUDED
Buttolph L P; Kay W ; Charnley S ; Moseley C ; Donoghue E M;	Nortwest Forest Plan - The first 10 years (1994-2003: Socioeconomic monitoring of the Olympic National Forest and three local communities	2006	SHC	No outcomes, study design	EXCLUDED
Buyinza M ;	Income distribution analysis of collaborative forest management programme in Mt. Elgon National Park, Uganda: Dual action for poverty alleviation and environment management	2010	JE	No comparisons	EXCLUDED
Buyinza Mukadasi ; Acobo J Titita;	Eco-Tourism for Environmental Conservation and Community Livelihoods Around Budongo Forest in Masindi District, Western Uganda.pdf	2009	JE	No comparisons	EXCLUDED
Cagalanan Dominique ;	Integrated Conservation and Development: Impacts on Households in a Philippine Park	2013	SHC	Qualitative data	EXCLUDED
Calderon MM, Nawir NN	An evaluation of the feasibility and benefits of forest partnerships to develop tree plantations: case studies in the Philippines	2006	SHC	Narrative case study	EXCLUDED
Calfoforo-Salas J ;	Extension work and the role of women in water catchment rehabilitation	1997	SHC	Qualitative data	EXCLUDED
Camara-Leret R ; Paniagua-Zambrana N ; Balslev H ; Barfod A ; Copete JC ; Macia MJ ;	Ecological community traits and traditional knowledge shape palm ecosystem services in northwestern South America	2014	SHC	Daily use	EXCLUDED
Campbell A ; Clark S ; Coad L ; Miles L ; Bolt K ; Roe D ;	Protecting the future: Carbon, forests, protected areas and local livelihoods	2008	SHC	Review	EXCLUDED
Campbell B M; Luckert M ; Scoones I ;	Local-level valuation of Savanna resources: A case study from Zimbabwe	1997	SHC	No comparisons	EXCLUDED
Campbell M O;	The ecological and social context of mammal hunting in the coastal savanna of Ghana	2005	SHC	No exposure	EXCLUDED
Campos P ; Daly-Hassen H ; Ovando R ;	Cork oak forest management in Spain and Tunisia: two case studies of conflicts between sustainability and private income	2007	SHC	Modeling	EXCLUDED
Campos Pablo ; Bonnieux Francois ; Caparros Alejandro ; Paoli Jean-Christophe ;	Measuring total sustainable incomes from multifunctional management of Corsican maritime pine and Andalusian cork oak Mediterranean forests	2007	SHC	Not discrete human populations	EXCLUDED
Cao Shixiong ;	Impact of China's large-scale ecological restoration program on the environment and society in arid and semiarid areas of China: achievements, problems, synthesis, and applications	2011	MCM, SHC	Inappropriate study design	EXCLUDED
Cao Y C; Piecuch I ;	The Role of the State in Achieving Sustainable Development in Human Capital, Technology and Environmental Protection	2012	SHC	Other	EXCLUDED
Caro-Borrero A ; Corbera E ; Neitzel KC ; Almeida-Lenero L ;	"We are the city lungs": Payments for ecosystem services in the outskirts of Mexico City	2015	SHC	No outcome	EXCLUDED
Carr D ;	A tale of two roads: Land tenure, poverty, and politics on the Guatemalan frontier	2006	SHC	No comparison	EXCLUDED
Casanova-Lugo F ; Ramirez-Aviles L ; Parsons D ; Caamal-Maldonado A ; Pineiro-Vazquez A T; Diaz-Echeverria V ;	Environmental services from tropical agroforestry systems	2016	SHC	Review	EXCLUDED
Castillo A ; Magana A ; Pujadas A ; Martínez L ; Godínez C ;	Understanding the interaction of rural people with ecosystems: A case study in a tropical dry forest of Mexico	2005	SHC	Perceptions	EXCLUDED
Castro A P; Nielsen E ;	Indigenous people and co-management: Implications for conflict management	2001	SHC	Study design	EXCLUDED
Castro-Nunez A ; Mertz O ; Quintero M ;	Propensity of farmers to conserve forest within REDD plus projects in areas affected by armed-conflict	2016	SHC	Preference for intervention	EXCLUDED
Catinot R ;	Sylviculture tropicale en forêt dense africaine [Tropical silviculture in African moist forest]	1965	SHC	Other	EXCLUDED
Cavendish William ;	Empirical regularities in the poverty-environment relationship of African rural households	1999	SHC	No comparator	EXCLUDED
Cawthorn DM ; Hoffman LC ;	The bushmeat and food security nexus: A global account of the contributions, conundrums and ethical collisions	2015	SHC	Irrelevant exposure	EXCLUDED
Cerbu G A; Sonwa D J; Pokorny B ;	Opportunities for and capacity barriers to the implementation of REDD+ projects with smallholder farmers: Case study of Awae and Akok, Centre and South Regions, Cameroon	2013	SHC	No outcome	EXCLUDED
Cerutti P O; Assembe-Mvondo S ; German L ; Putzel L ;	Is China unique? Exploring the behaviour of Chinese and European firms in the Cameroonian logging sector	2011	SHC	Qualitative data	EXCLUDED
Chakraborty Debojyoti ;	Small holder's carbon forestry project in Haryana India: issues and challenges	2010	SHC	No intervention	EXCLUDED
Chakraborty R N;	Stability and outcomes of common property institutions in forestry: evidence from the Terai region of Nepal	2001	SHC	Narrative case study	EXCLUDED
Challe Joyce FX; Niehof Anke ; Struik Paul C;	The significance of gathering wild orchid tubers for orphan household livelihoods in a context of HIV/AIDS in Tanzania	2011	SHC	No comparisons	EXCLUDED
Chambers F H;	An experiment in community participation of public forest management: The case of Mistik Management Ltd., Saskatchewan	2004	SHC	Evidence	EXCLUDED
Chambwera M ;	Economic analysis of urban fuelwood demand: the case of Harare in Zimbabwe	2004	SHC	THESIS	EXCLUDED
Chan Charlotta ;	Property rights and climate change vulnerability in Turkish forest communities: a case study from Seyhan River Basin, Turkey	2013	SHC	Qualitative data	EXCLUDED
Chan JM ; Day P ; Feely J ; Thompson R ; Little KM ; Norris CH ;	Acacia mearnsii industry overview: current status, key research and development issues	2015	SHC	Not discrete human population	EXCLUDED
Charnley S ; Donoghue E M; Moseley C ;	Forest management policy and community well-being in the Pacific Northwest	2008	SHC, KM	Narrative case study	EXCLUDED
Charnley S ; Poe M R;	Community forestry in theory and practice: Where are we now?	2007	SHC	Review	EXCLUDED
Chaturvedi A ; Hajare TN ; Patil NG ; Chaturvedi A ; Mungole A ; Kamble R ;	Land use planning issues in management of common property resources in a backward tribal area	2015	SHC	Not forest	EXCLUDED
Chauhan K V S; Sharma A K; Kumar R ;	Non-timber forest products subsistence and commercial uses: trends and future demands	2008	SHC	Not discrete human population	EXCLUDED
Chen Haiyun ; Shivakoti Ganesh ; Zhu Ting ; Maddox David ;	Livelihood sustainability and community based co-management of forest resources in China: Changes and improvement	2012	MCM, SHC	Project unclear	EXCLUDED
Chen Juan ; Innes John L;	The implications of new forest tenure reforms and forestry property markets for sustainable forest management and forest certification in China	2013	SHC	Qualitative data	EXCLUDED
Chen S ; Yi Z F; Campos-Arceiz A ; Chen M Y; Webb E L;	Developing a spatially-explicit, sustainable and risk-based insurance scheme to mitigate human-wildlife conflict	2013	SHC	Potential outcomes	EXCLUDED
Chevassus-Au-Louis B ; Pirard R ;	The ecosystem services of forests and their possible payment	2011	SHC	CANNOT LOCATE	CANNOT LOCATE
Cheveau M ; Imbeau L ; Drapeau P ; Bélanger L ;	Current status and future directions of traditional ecological knowledge in forest management: A review	2008	SHC	No intervention	EXCLUDED
Chhatre A ; Agrawal A ;	Trade-offs and synergies between carbon storage and livelihood benefits from forest commons	2009	SHC	No comparisons	EXCLUDED
Chhetri BBK ; Larsen HO ; Smith-Hall C ;	Environmental resources reduce income inequality and the prevalence, depth and severity of poverty in rural Nepal	2015	SHC, KM	No intervention	EXCLUDED
Chhetri P ; Bhattarai N K; Gudade B A; Gupta U ;	Indigenous knowledge on large cardamom	2013	SHC	Not discrete human population	EXCLUDED
CHIBWANA CHRISTOPHER ; JUMBE CHARLES B L; SHIVELY GERALD ;	Agricultural subsidies and forest clearing in Malawi	2013	SHC	No intervention	EXCLUDED
Chirwa P W; Syampungani S ; Geldenhuys C J;	The ecology and management of the Miombo woodlands for sustainable livelihoods in southern Africa: The case for non-timber forest products	2008	SHC	Review	EXCLUDED
Chokkalingam U ; Suyanto ; Permana R P; Kurniawan I ; Mannes J ; Darmawan A ; Khususyiah N ; Susanto R H;	Community fire use, resource change, and livelihood impacts: The downward spiral in the wetlands of southern Sumatra	2007	SHC	No outcome	EXCLUDED
Chowdhury M S. H; Koike M ;	An overview on the protected area system for forest conservation in Bangladesh	2010	SHC	Environmental outcomes	EXCLUDED
Chowdhury MSH ; Izumiyama S ; Koike M ;	Assessment of the Community Participation in and Attitudes Towards Co-management Programs in Rema-Kalenga Wildlife Sanctuary	2014	SHC	No comparator	EXCLUDED
Chowdhury MSH ; Koike M ; Izumiyama S ;	Local Communities' Use of Biomass Fuels and Attitude Towards Improved Cooking Stoves in and Around Rema-Kalenga Wildlife Sanctuary	2014	SHC, KM	No outcome	EXCLUDED
Chung Tiam Fook; T A ;	Sustaining indigenous lifeways through collaborative and community-led wildlife conservation in the North Rupununi, Guyana	2011	MCM	Qualitative data	EXCLUDED
Cinner J ; Fuentes Mmpb ; Randriamahazo H ;	Exploring Social Resilience in Madagascar's Marine Protected Areas	2009	SHC	Not forest	EXCLUDED
Clark Connie J; Poulsen John R; Mavah Germain A; Moukassa Antoine ; Nsosso Dominique ; Elkan Paul W;	Land-use Planning in a Co-management Context : Establishing Access Regulations that Promote Biodiversity Conservation and Support Local Livelihoods	2011	MCM	Qualitative data	EXCLUDED
Clarke Pepe ; Jupiter Stacy D;	Law, custom and community-based natural resource management in Kubulau District (Fiji)	2010	SHC	Study design	EXCLUDED
Clement Floriane ; Amezaga Jaime M;	Afforestation and forestry land allocation in northern Vietnam: Analysing the gap between policy intentions and outcomes	2009	MCM	Qualitative data	EXCLUDED
Clements Tom ; Milner-Gulland E J;	Impact of payments for environmental services and protected areas on local livelihoods and forest conservation in northern Cambodia	2015	MCM, KM	No intervention	EXCLUDED
Cocks M L; Bangay L ; Wiersum K F; Dold A P;	Seeing the wood for the trees: the role of woody resources for the construction of gender specific household cultural artefacts in non-traditional communities in the Eastern Cape, South Africa	2006	SHC	Daily use	EXCLUDED
Cocks Michelle L; Bangay Lindsey ; Shackleton Charlie M; Wiersum K Freerk;	`Rich man poor man' - inter-household and community factors influencing the use of wild plant resources amongst rural households in South Africa	2008	SHC	No intervention	EXCLUDED
Colchester M ;	SUSTAINING THE FORESTS - THE COMMUNITY-BASED APPROACH IN SOUTH AND SOUTH-EAST ASIA	1994	SHC	Study design	EXCLUDED
Cole Rebecca J;	Social and environmental impacts of payments for environmental services for agroforestry on small-scale farms in southern Costa Rica	2010	SHC, KM	Study design	EXCLUDED
Coles R W; Bussey S C;	Urban forest landscapes in the UK - Progressing the social agenda	2000	SHC	Perceptions	EXCLUDED
Colfer C J. P; Sheil D ; Kishi M ;	Forests and human health: assessing the evidence	2006	SHC	No comparisons	EXCLUDED
Colfer CJP ; Elias M ; Jamnadass R ;	Women and men in tropical dry forests: a preliminary review	2015	SHC	REVIEW	EXCLUDED
Collen Wain ; Krause Torsten ; Mundaca Luis ; Nicholas Kimberly A;	Building local institutions for national conservation programs: lessons for developing Reducing Emissions from Deforestation and Forest Degradation (REDD+) programs	2016	SHC	No comparisons	EXCLUDED
Connor K ; Barlow R ; Dimov L ; Smith M ;	Longleaf pine agroforestry	2012	SHC	Study design	EXCLUDED
Conroy Czech ; Mishra Abha ; Rai Ajay ;	Learning from self-initiated community forest management in Orissa, India	2002	JE	No comparisons	EXCLUDED
Constantino P de AL; Carlos HSA ; Ramalho EE ; Rostant L ; Marinelli CE ; Teles D ; Fonseca-Junior SF ; Fernandes RB ; Valsecchi J ;	Empowering Local People through Community-based Resource Monitoring: a Comparison of Brazil and Namibia	2012	SHC	No comparisons	EXCLUDED
Cooke Priscilla ; Kohlin Gunnar ; Hyde William F;	Fuelwood, forests and community management - evidence from household studies	2008	SHC	Review	EXCLUDED
Coomes O T; Burt G J;	Peasant charcoal production in the Peruvian Amazon: rainforest use and economic reliance	2001	SHC, KM	No intervention	EXCLUDED
Coomes Oliver T;	Income Formation among Amazonian Peasant Households in Northeastern Peru: Empirical Observations and Implications for Market-oriented Conservation	1996	SHC	No exposure	EXCLUDED
Corbera Esteve ; Brown Katrina ; Adger W Neil;	The equity and legitimacy of markets for ecosystem services	2007	SHC	Qualitative data only	EXCLUDED
Corbridge S ; Kumar S ;	Community, corruption, landscape: Tales from the tree trade	2002	SHC	Study design	EXCLUDED
Cornwall A ;	Whose voices? Whose choices? Reflections on gender and participatory development	2003	SHC	Study topic	EXCLUDED
Cosyns H ; Van Damme ; P ; De Wulf ; R ;	Who views what? Impact assessment through the eyes of farmers, development organization staff and researchers	2013	SHC, KM	No outcome	EXCLUDED
Coulibaly-Lingani P ; Savadogo P ; Tigabu M ; Oden P C;	Factors influencing people's participation in the forest management program in Burkina Faso, West Africa	2011	SHC	No comparisons	EXCLUDED
Craig C L; Weber R S; Akai H ;	Wild silk: wild silk enterprise programs to alleviate poverty and protect habitats	2012	SHC	CANNOT LOCATE	CANNOT LOCATE
Cramb R A; Colfer Carol J Pierce; Dressler Wolfram ; Laungaramsri Pinkaew ; Le Quang Trang; Mulyoutami Elok ; Peluso Nancy L; Wadley Reed L;	Swidden Transformations and Rural Livelihoods in Southeast Asia	2009	SHC	REVIEW	EXCLUDED
Cronkleton P ; Larson A ;	Formalization and Collective Appropriation of Space on Forest Frontiers: Comparing Communal and Individual Property Systems in the Peruvian and Ecuadoran Amazon	2015	SHC	No comparisons	EXCLUDED
Cronkleton Peter ; Pulhin Juan M; Saigal Sushil ;	Co-management in community forestry: How the partial devolution of management rights creates challenges for forest communities	2012	MCM	Secondary data only	EXCLUDED
Crookes D ; Humphreys D ; Masroh F ; Tarchie B ; Milner-Gulland EJ ;	The role of hunting in village livelihoods in the Ashanti region, Ghana	2014	SHC	Daily use	EXCLUDED
Crookes Douglas ;	The contribution of livelihood activities in the Limpopo province: Case study evidence from Makua and Manganeng	2003	SHC	Daily use	EXCLUDED
Crowell D W;	The SEWA movement and rural development: the Banaskantha and Kutch experience	2003	SHC	BOOK	EXCLUDED
Cunningham A ; Anoncho V F; Sunderland T ;	Power, policy and the Prunus africana bark trade, 1972-2015	2016	SHC	No outcome	EXCLUDED
Dahal Smriti ; Nepal Sanjay K; Schuett Michael A;	Examining Marginalized Communities and Local Conservation Institutions: The Case of Nepal’s Annapurna Conservation Area	2014	SHC	Narrative case study	EXCLUDED
Dahlberg Annika C; Trygger Sophie B;	Indigenous Medicine and Primary Health Care: The Importance of Lay Knowledge and Use of Medicinal Plants in Rural South Africa	2009	SHC	Study design	EXCLUDED
Dahlquist R M; Whelan M P; Winowiecki L ; Polidoro B ; Candela S ; Harvey C A; Wulfhorst J D; McDaniel P A; Bosque-Pérez N A;	Incorporating livelihoods in biodiversity conservation: a case study of cacao agroforestry systems in Talamanca, Costa Rica	2007	MCM	No comparisons	EXCLUDED
Danks C ;	Community forestry initiatives for the creation of sustainable rural livelihoods: A case from North America	2000	SHC, KM	Study design	EXCLUDED
Danks C M;	Benefits of community-based forestry in the US: Lessons from a demonstration programme	2009	SHC	Qualitative data only	EXCLUDED
Dansereau C ;	Respecting the land - Securing our future: Sustainable forest management in British Columbia, Canada	1998	SHC	NO ACCESS	NO ACCESS
Dansi A ; Vodouhè R ; Azokpota P ; Yedomonhan H ; Assogba P ; Adjatin A ; Loko Y L; Dossou-Aminon I ; Akpagana K ;	Diversity of the Neglected and Underutilized Crop Species of Importance in Benin	2012	SHC	Daily use	EXCLUDED
Das N ;	Formation of social capital in gender sensitive participatory forestry programme in west Bengal	2011	SHC	NO ACCESS	NO ACCESS
Dat Pham Tien; Yoshino Kunihiko ;	Comparing mangrove forest management in Hai Phong City, Vietnam towards sustainable aquaculture	2013	SHC, KM	No outcome	EXCLUDED
Datta Ashokankur ; Koehlin Gunnar ;	Tenure and Forest Management in India: Impacts on Equity and Efficiency of Van Panchayats in Uttarakhand	2013	SHC	NO ACCESS	NO ACCESS
Datta S K; Sarkar K ;	NTFPs and Their Commercialization Issues from the Perspective of Rural Livelihood and the State of Forest Resources: A Study of the Ranibundh Forest Range in West Bengal, India	2012	SHC	No intervention	EXCLUDED
Datta S K; Virgo K J;	Towards sustainable watershed development through people's participation: Lessons from the lesser Himalaya, Uttar Pradesh, India	1998	SHC, KM	Narrative case study	EXCLUDED
Davis A ;	` Ha! What is the benefit of living next to the park?' Factors limiting in-migration next to Tarangire National Park, Tanzania	2011	SHC	Narrative case study	EXCLUDED
Dawkins H C; Philip M S;	Tropical moist forest silviculture and management: a history of success and failure	1998	SHC	BOOK	EXCLUDED
Dawson IK ; Leakey R ; Clement CR ; Weber JC ; Cornelius JP ; Roshetko JM ; Vinceti B ; Kalinganire A ; Tchoundjeu Z ; Masters E ; Jamnadass R ;	The management of tree genetic resources and the livelihoods of rural communities in the tropics: Non-timber forest products, smallholder agroforestry practices and tree commodity crops	2014	SHC	Review	EXCLUDED
de Aquino ; Andre Rodrigues ; Aasrud Andre ; Guimaraes Leticia ;	Can Forest Carbon Finance Influence Land Tenure Security in Project Areas? Preliminary Lessons from Projects in Niger and Kenya	2011	SHC	No comparisons	EXCLUDED
de Blas ; D E ; Perez M R; Sayer J A; Lescuyer G ; Nasi R ; Karsenty A ;	External Influences on and Conditions for Community Logging Management in Cameroon	2009	SHC	No outcome	EXCLUDED
de Koning ; Free ; Aguinaga Marcela ; Bravo Manuel ; Chiu Marco ; Lascano Max ; Lozada Tannya ; Suarez Luis ;	Bridging the gap between forest conservation and poverty alleviation: the Ecuadorian Socio Bosque program	2011	KM	Review	EXCLUDED
de Koning ; J ;	Unpredictable Outcomes in Forestry-Governance Institutions in Practice	2014	SHC	Narrative case study	EXCLUDED
de la Torre lu delatorresalvador@gmail.com; Lucía1 ; Valencia lrvalencia@puce edu.ec; Renato1 ; Altamirano Carolina1 ; Ravnborg Helle2 ;	Legal and Administrative Regulation of Palms and Other NTFPs in Colombia, Ecuador, Peru and Bolivia.	2011	SHC	Qualitative data	EXCLUDED
de Merode ; Emmanuel ; Homewood Katherine ; Cowlishaw Guy ;	The value of bushmeat and other wild foods to rural households living in extreme poverty in Democratic Republic of Congo	2004	SHC	Daily use	EXCLUDED
De Souza ; G C ; Kubo R ; Guimarães L ; Elisabetsky E ;	An ethnobiological assessment of Rumohra adiantiformis (samambaia-preta) extractivism in Southern Brazil	2006	SHC	No comparisons	EXCLUDED
Debabrata Saha ; Sundriyal R C;	Utilization of non-timber forest products in humid tropics: implications for management and livelihood	2012	SHC	No comparisons	EXCLUDED
DeFoliart G R;	Overview of role of edible insects in preserving biodiversity	2005	SHC	Study design	EXCLUDED
DeForesta H ; Michon G ;	The agroforest alternative to Imperata grasslands: when smallholder agriculture and forestry reach sustainability	1996	SHC	Study topic	EXCLUDED
Dei G J. S;	Hunting and gathering in a Ghanaian rain forest community	1989	SHC	Daily use	EXCLUDED
Del Amo Rodríguez ; S ; Vergara-Tenorio M D. C;	Reflections on the social learning process for community work in rural areas of Mexico	2007	SHC	Qualitative data only	EXCLUDED
Delacote Philippe ; Palmer Charles ; Bakkegaard Riyong Kim; Thorsen Bo Jellesmark;	Unveiling Information on Opportunity Costs in REDD: Who Obtains the Surplus When Policy Objectives Differ?	2014	SHC	Modeling	EXCLUDED
Delang Claudio O;	Indigenous Systems of Forest Classification: Understanding Land Use Patterns and the Role of NTFPs in Shifting Cultivators’ Subsistence Economies	2006	SHC	No comparisons	EXCLUDED
Delang Claudio O;	The role of wild food plants in poverty alleviation and biodiversity conservation in tropical countries	2006	SHC	Daily use	EXCLUDED
Delgado-Serrano Maria del Mar; Escalante Roberto ; Basurto Saul ;	Is the Community-Based Management of Natural Resources Inherently Linked to Resilience? An Analysis of the Santiago Comaltepec Community (Mexico)	2015	SHC	Qualitative data only	EXCLUDED
der Horst ; Greg ;	`We are Scared to Say No': Facing Foreign Timber Companies in Sierra Leone's Community Woodlands	2011	SHC	Narrative case study	EXCLUDED
Deschamps V ;	Biodiversity and social benefits in community-based forest management : the Leuser ecosystem, Indonesia	2001	MCM	Study design unclear	EXCLUDED
Devkota S R;	Is strong sustainability operational? An example from Nepal	2005	SHC	Study design	EXCLUDED
Devkota Surendra R;	WHETHER STRONG SUSTAINABILITY IS OPERATIONAL? AN EXAMPLE FROM NEPAL	2010	SHC	No comparisons	EXCLUDED
Dhital N ; Vololomboahangy RR ; Khasa DP ;	Issues and challenges of forest governance in Madagascar	2015	SHC	Narrative	EXCLUDED
Di Gregorio ; Monica ; Brockhaus Maria ; Cronin Tim ; Muharrom Efrian ; Santoso Levania ; Mardiah Sofi ; Buedenbender Mirjam ;	Equity and REDD plus in the Media: a Comparative Analysis of Policy Discourses	2013	SHC	No outcome	EXCLUDED
Diamante-Camacho L ; Camacho S C; Youn YeoChang ;	Values of forest products in the Makiling Forest Reserve (MFR), Philippines	2009	SHC	Daily use	EXCLUDED
Dinerstein E ; Varma K ; Wikramanayake E ; Powell G ; Lumpkin S ; Naidoo R ; Korchinsky M ; Del Valle ; C ; Lohani S ; Seidensticker J ; Joldersma D ; Lovejoy T ; Kushlin A ;	Enhancing Conservation, Ecosystem Services, and Local Livelihoods through a Wildlife Premium Mechanism	2013	SHC	No comparisons	EXCLUDED
Diop A ; Fraser R ;	A community-based forestry approach to poverty alleviation in Alabama's Black Belt Region	2009	SHC	No comparisons	EXCLUDED
Diotallevi Francesco ; Marchini Andrea ; Pampanini Rossella ; Ciani Adriano ;	Sustainable and Economic Management of Forest Resources: a Strategic Case study from Italy	2013	SHC	CANNOT LOCATE	CANNOT LOCATE
Djanibekov U ; Djanibekov N ; Khamzina A ; Bhaduri A ; Lamers J P. A; Berg E ;	Impacts of innovative forestry land use on rural livelihood in a bimodal agricultural system in irrigated drylands	2013	SHC	Modeling	EXCLUDED
Djoudi H ; Vergles E ; Blackie RR ; Koame CK ; Gautier D ;	Dry forests, livelihoods and poverty alleviation: understanding current trends	2015	SHC	REVIEW	EXCLUDED
Dodd M B; Wedderburn M E; Parminter T G; Thorrold B S; Quinn J M;	Transformation toward agricultural sustainability in New Zealand hill country pastoral landscapes	2008	SHC	No outcome	EXCLUDED
Dolisca Frito ; Carter Douglas R; McDaniel Joshua M; Shannon Dennis A; Jolly Curtis M;	Factors influencing farmers’ participation in forestry management programs: A case study from Haiti	2006	JE	No comparisons	EXCLUDED
Donoghue E M; Sutton N L;	Socioeconomic change in planning provinces of the Northwest Forest Plan region	2006	SHC, KM	No outcome	EXCLUDED
Donoghue Ellen M; Cubbage Frederick W; Mercer D Evan;	Contract NGOs in Community-Based Forest Management in the Philippines	2003	SHC	Outcomes not realized	EXCLUDED
Donovan J ; Poole N ;	Asset building in response to value chain development: Lessons from taro producers in Nicaragua	2013	SHC	Not forest	EXCLUDED
Dorji L ; Webb E L; Shivakoti G P;	Forest property rights under nationalized forest management in Bhutan	2006	SHC	No comparisons	EXCLUDED
Dougill A J; Soussan J G; Kiff E ; Springate-Baginski O ; Yadav N P; Dev O P; Hurford A P;	Impacts of community forestry on farming system sustainability in the Middle Hills of Nepal	2001	SHC	No comparisons	EXCLUDED
Dougill A J; Stringer L C; Leventon J ; Riddell M ; Rueff H ; Spracklen D V; Butt E ;	Lessons from community-based payment for ecosystem service schemes: from forests to rangelands	2012	SHC	Qualitative data	EXCLUDED
Douglas Ian ;	Urban ecology and urban ecosystems: understanding the links to human health and well-being	2012	SHC	REVIEW	EXCLUDED
Dovie Delali B.K; Shackleton Charlie M; Witkowski E T.F;	Conceptualizing the human use of wild edible herbs for conservation in South African communal areas	2007	SHC	No intervention	EXCLUDED
Dowie M ;	Conservation refugees: The hundred-year conflict between global conservation and native peoples	2009	SHC	BOOK	EXCLUDED
Dressler W ; Buscher B ; Schoon M ; Brockington D ; Hayes T ; Kull C A; McCarthy J ; Shrestha K ;	From hope to crisis and back again? A critical history of the global CBNRM narrative	2010	SHC	Narrative case study	EXCLUDED
Dressler Wolfram ;	Disentangling Tagbanua lifeways, Swidden and conservation on Palawan Island	2005	SHC	Qualitative data	EXCLUDED
Dressler Wolfram ; McDermott Melanie ; Smith Will ; Pulhin Juan ;	REDD Policy Impacts on Indigenous Property Rights Regimes on Palawan Island, the Philippines	2012	SHC	No comparisons	EXCLUDED
Dressler Wolfram ; Roth Robin ;	The Good, the Bad, and the Contradictory: Neoliberal Conservation Governance in Rural Southeast Asia	2011	SHC	Narrative case study	EXCLUDED
Drigo Isabel ; Piketty Marie-Gabrielle ; Pena Driss ; Sist Plinio ;	Cash income from community-based forest management: lessons from two case studies in the Brazilian Amazon	2013	SHC, KM	No comparator	EXCLUDED
Duangnapa C ; Patchimwaranukul P ; Karnjanangkura D ;	The utilization of buddhist economic philosophy in cultural forest management for community social and economic development in the province of Trat	2009	SHC	Qualitative data	EXCLUDED
Duguma Lalisa Alemayehu;	Financial analysis of agroforestry land uses and its implications for smallholder farmers livelihood improvement in Ethiopia	2013	SHC	No comparisons	EXCLUDED
Duguya D ; Kotwal P C; Horo N V;	Developing local accountability for sustainable management of non-timber forest products	2005	SHC	CANNOT LOCATE	CANNOT LOCATE
Duinker P N; Matakala P W; Chege F ; Bouthillier L ;	COMMUNITY FORESTS IN CANADA - AN OVERVIEW	1994	SHC	Study design	EXCLUDED
Eba'a Atyi ; R ; Assembe-Mvondo S ; Lescuyer G ; Cerutti P ;	Impacts of international timber procurement policies on Central Africa's forestry sector: The case of Cameroon	2013	SHC, KM	Study design	EXCLUDED
Ebeling Johannes ; Yasue Mai ;	The effectiveness of market-based conservation in the tropics: Forest certification in Ecuador and Bolivia	2009	SHC	Not discrete human population	EXCLUDED
Egartner S ; Weber N ;	Quality of life of the Austrian agricultural and forestry population - environmental quality in rural and urban regions in Austria - ist impact on quality of life Lebensqualitat der land- und forstwirtschaftlichen Bevolkerung sowie Umweltqualitat in urbanen und landlichen Regionen Osterreichs	2015	SHC	CANNOT LOCATE	CANNOT LOCATE
Ehara M ; Hyakumura K ; Nomura H ; Matsuura T ; Sokh H ; Leng C ;	Identifying characteristics of households affected by deforestation in their fuelwood and non-timber forest product collections: Case study in Kampong Thom Province, Cambodia	2016	SHC	No intervention	EXCLUDED
Ehiagbanare J E;	Economic contributions of the forest to the economy of Edo State, Nigeria	2007	SHC, KM	No intervention	EXCLUDED
Eilola S ; Kayhko N ; Fagerholm N ; Kombo YH ;	Linking Farmers' Knowledge, Farming Strategies, and Consequent Cultivation Patterns into the Identification of Healthy Agroecosystem Characteristics at Local Scales	2014	SHC	No outcome	EXCLUDED
Elands B H. M; O'Leary T N. O; Boerwinkel H W. J; Wiersum K F;	Forests as a mirror of rural conditions; local views on the role of forests across Europe	2004	SHC	Study design	EXCLUDED
Elbakidze Marine ; Angelstam Per ;	Implementing sustainable forest management in Ukraine's Carpathian Mountains: The role of traditional village systems	2007	SHC	No comparisons	EXCLUDED
Elías Silvel ;	From communal forests to protected areas: The implications of tenure changes in natural resource management in Guatemala	2012	MCM	Qualitative data	EXCLUDED
Ellefson Paul V; Kilgore Michael A; Granskog James E;	Government regulation of forestry practices on private forest land in the United States: An assessment of state government responsibilities and program performance	2007	SHC	No outcome	EXCLUDED
Emery M ; Martin S ; Dyke A ;	Wild harvests from Scottish woodlands: social, cultural and economic values of contemporary non-timber forest products	2006	SHC	Qualitative data	EXCLUDED
Emtage N F; Suh JungHo ;	Variations in socioeconomic characteristics, farming assets and livelihood systems of Leyte rural households	2005	SHC, KM	No intervention, no outcome	EXCLUDED
Enongene KE ; Fobissie K ;	The potential of REDD plus in supporting the transition to a Green Economy in the Congo Basin	2016	SHC	Qualitative data	EXCLUDED
Escobedo Urquizo ; J ;	Participation in upland development and conservation	1999	SHC, KM	Qualitative data	EXCLUDED
Espírito-Santo Mário M; Sevilha Anderson Cássio; Anaya Felisa C; Barbosa Rômulo ; Fernandes G Wilson; Sanchez-Azofeifa G Arturo; Scariot Aldicir ; Noronha Sérgio Eustáquio De; Sampaio Cristina Andrade;	Sustainability of tropical dry forests: Two case studies in southeastern and central Brazil	2009	MCM	Qualitative data	EXCLUDED
Eve E ; Arguelles F A; Fearnside P M;	How well does Brazil's environmental law work in practice? Environmental impact assessment and the case of the Itapiranga Private Sustainable Logging Plan	2000	SHC	No outcome	EXCLUDED
Fabricius C ; Koch E ;	Towards strengthening collaborative ecosystem management: Lessons from environmental conflict and political change in southern Africa	2001	SHC	Narrative	EXCLUDED
Fagerholm N ; Kayhko N ; Ndumbaro F ; Khamis M ;	Community stakeholders' knowledge in landscape assessments - Mapping indicators for landscape services	2012	SHC	No outcome	EXCLUDED
Fairweather J R; Mayell P J; Swaffield S R;	Forestry and agriculture on the New Zealand East Coast: Socio-economic characteristics associated with land use change	2000	SHC	BOOK	EXCLUDED
Falcão M P; Emerenciano D B;	Impact of forest management regimes of forest resource use, conservation and income of stakeholders in Savane, Mozambique	2011	SHC	Non-English	EXCLUDED
Falconer J ; Arnold J E. M;	Forests, trees and household food security	1988	SHC	Review	EXCLUDED
Falconer J ; Arnold J E. M;	Household food security and forestry: an analysis of socioeconomic issues	1989	SHC	Review	EXCLUDED
Famuyide O O; Adebayo O ; Ajayi A C; Azeez F A; Adeyemo A ; Alademerin J ; Akankuku A I;	Impact assessment of selected non-timber forest products in Ibadan Metropolis	2011	SHC	NO ACCESS	NO ACCESS
Fandohan B ; Assogbadjo A E; Kakai R G; Kyndt T ; De Caluwe ; E ; Codjia J T. C; Sinsin B ;	Women's Traditional Knowledge, Use Value, and the Contribution of Tamarind (Tamarindus indica L.) to Rural Households' Cash Income in Benin	2010	SHC	No exposure	EXCLUDED
Fenemor A ; Deans N ; Davie T ; Allen W ; Dymond J ; Kilvington M ; Phillips C ; Basher L ; Gillespie P ; Young R ; Sinner J ; Harmsworth G ; Atkinson M ; Smith R ;	Collaboration and modelling - Tools for integration in the Motueka catchment, New Zealand	2008	SHC	No outcome	EXCLUDED
Ferraro P J;	Global habitat protection: Limitations of development interventions and a role for conservation performance payments	2001	SHC	Study design	EXCLUDED
Ferreira JBS ; Fachinello AL ;	Employment and income generation in the Brazilian Amazon forest: a Social Account Matrix based multiplier approach	2015	SHC	Not discrete human population	EXCLUDED
Ferreira W S; Ladio A H; de Albuquerque ; U P ;	Resilience and adaptation in the use of medicinal plants with suspected anti-inflammatory activity in the Brazilian Northeast	2011	SHC	No outcome	EXCLUDED
Feyssa D H; Njoka J T; Asfaw Z ; Nyangito M M;	Wild edible fruits of importance for human nutrition in semiarid parts of east Shewa Zone, Ethiopia: Associated indigenous knowledge and implications to food security	2011	SHC	No outcome	EXCLUDED
Finley-Brook Mary ;	Inter-Indigenous development aid: markets, corporations, and biases	2011	SHC	Narrative case study	EXCLUDED
Fisher M ;	Household welfare and forest dependence in Southern Malawi	2004	SHC	No comparisons	EXCLUDED
Fisher M ; Chaudhury M ; McCusker B ;	Do Forests Help Rural Households Adapt to Climate Variability? Evidence from Southern Malawi	2010	SHC	No comparisons	EXCLUDED
Fisher Monica ; Shively Gerald ;	Can Income Programs Reduce Tropical Forest Pressure? Income Shocks and Forest Use in Malawi	2005	SHC	No comparisons	EXCLUDED
Fisher R ; Hirsch P ;	Poverty and agrarian-forest interactions in Thailand	2008	SHC	Study design	EXCLUDED
Fleischman FD ;	Why do Foresters Plant Trees? Testing Theories of Bureaucratic Decision-Making in Central India	2014	SHC	Adoption of methods	EXCLUDED
Fleming B ; Puleston Fleming ; J ;	A watershed conservation success story in Nepal: Land use changes over 30 years	2009	SHC	NO ACCESS	NO ACCESS
Foerster Steffen ; Wilkie David S; Morelli Gilda a; Demmer Josefien ; Starkey Malcolm ; Telfer Paul ; Steil Matthew ;	Human livelihoods and protected areas in Gabon: a cross-sectional comparison of welfare and consumption patterns	2011	SHC	Qualitative data	EXCLUDED
Fondoun J M; Manga T T; Kengue J ;	Ricinodendron heudelotii (Djansang): ethnobotany and importance for forest dwellers in southern Cameroon	1999	SHC	CANNOT LOCATE	CANNOT LOCATE
Foresta H de; Michon G ;	Creation and management of rural agroforests in Indonesia: potential applications in Africa	1993	SHC	NO ACCESS	NO ACCESS
Fosso A ;	Integrated initiatives in support of urban and peri-urban horticulture in Namibia: project achievements	2014	SHC	NO ACCESS	NO ACCESS
Francisco-Arriaga F ; Guerrero Garcia-Rojas ; H R ; Kido-Cruz A ; Cortes-Zava M T;	Income generated by forest resource harvesting in Pichataro, Michoacan, Mexico	2011	SHC	Non-English	EXCLUDED
Fu Bojie ; Wang Kelin ; Lu Yihe ; Liu Shiliang ; Keming Ma ; Chen Liding ; Liu Guohua ;	Entangling the complexity of protected area management: the case of Wolong Biosphere Reserve, southwestern China.	2004	SHC	Inappropriate comparisons (sites)	EXCLUDED
Fu Y ; Chen J ; Guo H ; Chen A ; Cui J ;	Utilisation and conservation strategies for plant resources in tropical montane agroecosystems: A case study from Xishuangbanna, SW China	2008	SHC	Daily use	EXCLUDED
Fuchigami Y ; Hara K ; Uwasu M ; Kurimoto S ;	Analysis of the Mechanism Hindering Sustainable Forestry Operations: A Case Study of Japanese Forest Management	2016	SHC	No outcome	EXCLUDED
Fujisaka S ; Wollenberg E ;	From forest to agroforest and logger to agroforester: a case study	1991	SHC	Narrative case study	EXCLUDED
Funk Jason ; Kerr Suzi ;	Restoring forests through carbon farming on Maori land in New Zealand/Aotearoa	2007	SHC	Narrative case study	EXCLUDED
Funnell D C; Bynoe P E;	Ecotourism and Institutional Structures: The Case of North Rupununi, Guyana	2007	SHC	Inappropriate comparators	EXCLUDED
Furness E ; Harshaw H ; Nelson H ;	Community forestry in British Columbia: Policy progression and public participation	2015	SHC	Qualitative data	EXCLUDED
Fuys A ; Dohrn S ;	Common Property Regimes: Taking a Closer Look at Resource Access, Authorization, and Legitimacy	2010	SHC	BOOK	EXCLUDED
Galudra G ; van Noordwijk M ; Agung P ; Suyanto S ; Pradhan U ;	Migrants, land markets and carbon emissions in Jambi, Indonesia: Land tenure change and the prospect of emission reduction	2014	SHC	Study design	EXCLUDED
Garcia-Lopez Gustavo A; Arizpe Nancy ;	Participatory processes in the soy conflicts in Paraguay and Argentina	2010	SHC	Not forest	EXCLUDED
Garforth C J; Malla Y B; Neopane R P; Pandit B H;	Socioeconomic factors and agro-forestry improvements in the hills of Nepal	1999	SHC	No comparisons	EXCLUDED
Garrity D P; Akinnifesi F K; Ajayi O C; Weldesemayat S G; Mowo J G; Kalinganire A ; Larwanou M ; Bayala J ;	Evergreen Agriculture: A robust approach to sustainable food security in Africa	2010	SHC	Narrative	EXCLUDED
Gatto P ; Pettenella D ; Secco L ;	Payments for forest environmental services: organisational models and related experiences in Italy	2009	SHC	Case study	EXCLUDED
GAUTAM AMBIKA P; SHIVAKOTI GANESH P;	Conditions for Successful Local Collective Action in Forestry: Some Evidence From the Hills of Nepal	2005	SHC	Environmental outcomes only	EXCLUDED
Gautam K H; Watanabe T ;	Silviculture for non-timber forest product management: Challenges and opportunities for sustainable forest management	2002	SHC	REVIEW	EXCLUDED
Gbadegesin Adeniyi ;	Management of forest resources by women: a case study from the Olokemeji Forest Reserve area, southwestern Nigeria	2009	JE, SHC	Qualitative data, unclear intervention	EXCLUDED
Gebara Maria Fernanda;	Importance of local participation in achieving equity in benefit-sharing mechanisms for REDD plus : a case study from the Juma Sustainable Development Reserve	2013	SHC	Qualitative data	EXCLUDED
Gebrehiwot M ; Elbakidze M ; Lidestav G ; Sandewall M ; Angelstam P ; Habtemariam Kassa ;	From self-subsistence farm production to khat: driving forces of change in Ethiopian agroforestry homegardens	2016	SHC	Qualitative data	EXCLUDED
Genin D ; Simenel R ;	Endogenous Berber Forest Management and the Functional Shaping of Rural Forests in Southern Morocco: Implications for Shared Forest Management Options	2011	SHC	No outcome	EXCLUDED
German L ; Villamor G ; Twine E ; Velarde S J; Kidane B ;	Environmental services and the precautionary principle: Using scenarios to reconcile conservation and livelihood objectives in upper catchments	2009	SHC	No outcome	EXCLUDED
German Laura ; Mazengia Waga ; Taye Hailemichael ; Tsegaye Mesfin ; Ayele Shenkut ; Charamila Sarah ; Wickama Juma ;	Minimizing the livelihood trade-offs of natural resource management in the Eastern African Highlands: Policy Implications of a Project in "creative governance"	2010	SHC	Qualitative data	EXCLUDED
Ghate Rucha ; Mehra Deepshikha ; Nagendra Harini ;	Local institutions as mediators of the impact of markets on non-timber forest product extraction in central India	2009	MCM, KM	No outcome	EXCLUDED
Ghazanfari Hedayat ; Namiranian Manoochehr ; Sobhani Hooshang ; Mohajer Reza M;	Traditional Forest Management and its Application to Encourage Public Participation for Sustainable Forest Management in the Northern Zagros Mountains of Kurdistan Province, Iran	2004	SHC	No outcome	EXCLUDED
Gibson C C; Williams J T; Ostrom E ;	Local enforcement and better forests	2005	SHC	No outcome	EXCLUDED
Gios Geremia ; Rizio Dina ;	Payment for forest environmental services: a meta-analysis of successful elements	2013	SHC	Study design	EXCLUDED
Giri K ; Pokhrel B ; Darnhofer I ;	In the absence of their men: Women and forest management in the Mid-hills of Nepal	2008	SHC	Qualitative data	EXCLUDED
Girma J ; Gardebroek C ;	The impact of contracts on organic honey producers' incomes in southwestern Ethiopia	2015	SHC	Not forest	EXCLUDED
Girma W ; Beyene F ;	Institutional Challenges in Sustainable Forest Management: Evidence from the Gambella Regional State of Western Ethiopia	2015	SHC	No intervention	EXCLUDED
Glaser Marion ;	Interrelations between mangrove ecosystem, local economy and social sustainability in Caeté Estuary, North Brazil	2003	SHC	No intervention	EXCLUDED
Glew L ; Hudson MD ; Osborne PE ;	Evaluating the effectiveness of community-based conservation in northern Kenya: A report to The Nature Conservancy.	2010	SHC	No comparisons	EXCLUDED
Gockel Catherine Kilbane; Gray Leslie C;	Integrating Conservation and Development in the Peruvian Amazon	2009	SHC	No comparisons	EXCLUDED
Godoy R ; Kirby K ; Wilkie D ;	Tenure security, private time preference, and use of natural resources among lowland Bolivian Amerindians	2001	SHC	No outcome	EXCLUDED
Goebel A ;	``Then it's clear who owns the trees?{''}: Common property and private control in the social forest in a Zimbabwean resettlement area	1999	SHC	Qualitative data	EXCLUDED
Golden Christopher D;	Bushmeat hunting and use in the Makira Forest, north-eastern Madagascar: a conservation and livelihoods issue	2009	SHC	No outcome	EXCLUDED
Golmohammadi Farhood ;	Desertification Through Rural People Participation (Experience of International Project of Carbon Sequestration in South Khorasan Province - East of Iran)	2013	SHC	Narrative case study	EXCLUDED
Gomiero Tiziano ; Pettenella Davide ;	Vietnamese Uplands: Environmental and socio-economic perspective of forest land allocation and deforestation process	2000	MCM	Qualitative data	EXCLUDED
Gordon Ian ; Ayiemba Washington ;	Harnessing Butterfly Biodiversity for Improving Livelihoods and Forest Conservation: The Kipepeo Project	2003	SHC	Duplicate	EXCLUDED
Gottret M V; White D ;	Assessing the impact of integrated natural resource management: Challenges and experiences	2002	SHC	Not forest	EXCLUDED
Gourlet-Fleury S ; Nasi R ;	IUFRO international conference report: What future is there for tropical forest silviculture?	2011	SHC	Study design	EXCLUDED
Greene J L;	The economic effect of federal income tax incentives in southern timber types	1997	SHC	CANNOT LOCATE	CANNOT LOCATE
Greene J L; Haines T K;	Tapping into forest management assistance programs	1999	SHC	No outcomes	EXCLUDED
Greene J L; Straka T J; Dee R J;	Nonindustrial private forest owner use of federal income tax provisions	2004	SHC	No outcome	EXCLUDED
GRIFFIN D M;	IMPLEMENTATION OF THE RESULTS OF SCIENTIFIC-RESEARCH IN PRACTICAL MANAGEMENT - A CASE-STUDY FROM NEPALESE FORESTRY	1991	SHC	Study topic	EXCLUDED
Gritten D ; Greijmans M ; Lewis SR ; Sokchea T ; Atkinson J ; Quang TN ; Poudyal B ; Chapagain B ; Sapkota LM ; Mohns B ; Paudel NS ;	An Uneven Playing Field: Regulatory Barriers to Communities Making a Living from the Timber from Their Forests-Examples from Cambodia, Nepal and Vietnam	2015	SHC	No comparisons	EXCLUDED
Groninger John W;	Reforestation Strategies Amid Social Instability: Lessons from Afghanistan	2012	SHC	Narrative	EXCLUDED
Groom Ben ; Palmer Charles ;	REDD+ and rural livelihoods	2012	JE, KM	Study design	EXCLUDED
Gross-Camp ND ; Martin A ; McGuire S ; Kebede B ;	The Privatization of the Nyungwe National Park Buffer Zone and Implications for Adjacent Communities	2015	SHC	Subsistence	EXCLUDED
Grundy I ; Turpie J ; Jagger P ; Witkowski E ; Guambe I ; Semwayo D ; Solomon A ;	Implications of co-management for benefits from natural resources for rural households in north-western Zimbabwe.	2000	SHC	Modeling	EXCLUDED
GRUNDY I M; CAMPBELL B M; WHITE R M; PRABHU R ; JENSEN S ; NGAMILE T N;	Participatory Forest Management in Conservation Areas: the Case of Cwebe, South Africa	2004	SHC	Narrative case study	EXCLUDED
Grundy Isla ; Turpie Jane ; Jagger Pamela ; Witkowski Ed ; Guambe Isabelle ; Semwayo Daniel ; Solomon Anastelle ;	SPECIAL SECTION: LAND USE OPTIONS IN DRY TROPICAL WOODLAND ECOSYSTEMS IN ZIMBABWE	2000	SHC	Modeling	EXCLUDED
Gu H Y; Jiao Y M; Liang L H;	Strengthening the socio-ecological resilience of forest-dependent communities: The case of the Hani Rice Terraces in Yunnan, China	2012	MCM	No comparisons	EXCLUDED
Gu H Y; Jiao Y M; Liang L H;	Strengthening the socio-ecological resilience of forest-dependent communities: The case of the Hani Rice Terraces in Yunnan, China	2012	SHC	Study design	EXCLUDED
Guariguata M R; Evans K ;	Advancing tropical forestry curricula through Non-Timber Forest Products	2010	SHC	No comparisons	EXCLUDED
GUBBI SANJAY ; LINKIE MATTHEW ; LEADER-WILLIAMS NIGEL ;	Evaluating the legacy of an integrated conservation and development project around a tiger reserve in India	2008	SHC	No outcome	EXCLUDED
Gubbi Sanjay ; MacMillan Douglas C;	Can non-timber forest products solve livelihood problems? A case study from Periyar Tiger Reserve, India	2008	SHC, KM	No intervention	EXCLUDED
Guedes Pinto ; Luis Fernando ; McDermott Constance ;	Equity and forest certification - A case study in Brazil	2013	SHC	No comparisons	EXCLUDED
Guevara J T; Milla D V;	Successful experiences of sustainable land use in hyperarid, arid and semiarid zones from Peru	2007	SHC	No outcomes	EXCLUDED
Guo HH ; Li B ; Hou Y ; Lu SB ; Nan B ;	Rural households' willingness to participate in the Grain for Green program again: A case study of Zhungeer, China	2014	SHC	Adoption of methods	EXCLUDED
Gupta Ranjana ; Srivastava S K; Mahendra A K; Pundir Ira ; Kumar Dinesh ;	Impact of Participatory Forest Management on socio-economic development of rural people: a case study in Kodsi and Talaichittor villages of Dehra Dun District.	2004	MCM	NO ACCESS	NO ACCESS
Gupte Manjusha ;	Participation in a gendered environment: The case of community forestry in India	2004	MCM	Qualitative data only	EXCLUDED
Gurung Bhim ; Nelson Kristen C; Smith James L D;	Impact of grazing restrictions on livestock composition and husbandry practices in Madi Valley, Chitwan National Park, Nepal	2009	SHC	No outcome	EXCLUDED
Gurung Hum Bahadur;	Fusioning: A grounded theory of participatory governance in the Annapurna Conservation Area, Nepal	2008	SHC	THESIS	EXCLUDED
Gutiérrez Rodríguez ; Lucas ; Hogarth Nick ; Zhou Wen ; Putzel Louis ; Xie Chen ; Zhang Kun ;	Socioeconomic and environmental effects of China’s Conversion of Cropland to Forest Program after 15 years: a systematic review protocol	2015	SHC	PROTOCOL	EXCLUDED
Hafner James A; Apichatvullop Yaowalak ;	Farming the forest: Managing people and trees in reserved forests in Thailand	1990	SHC	Qualitative data	EXCLUDED
Hagos Fitsum ; Holden Stein ;	Tenure security, resource poverty, public programs, and household plot-level conservation investments in the highlands of northern Ethiopia	2006	SHC	Adoption of methods	EXCLUDED
Hahn S ; Anandaraja N ; D'Agnes L ;	Linking population, health, and the environment: an overview of integrated programs and a case study in Nepal	2011	SHC	Review	EXCLUDED
Hajjar Reem ; McGrath David G; Kozak Robert a; Innes John L;	Framing community forestry challenges with a broader lens: Case studies from the Brazilian Amazon	2011	MCM	Qualitative data	EXCLUDED
Hajjar RF ; Kozak RA ; Innes JL ;	Is Decentralization Leading to" Real" Decision-Making Power for Forest- dependent Communities? Case Studies from Mexico and Brazil	2012	SHC	Qualitative data	EXCLUDED
Hall Anthony ;	Paying for environmental services: The case of Brazilian Amazonia	2008	SHC	Study design	EXCLUDED
Haller T ;	BETWEEN OPEN ACCESS, PRIVATISATION AND COLLECTIVE ACTION: A COMPARATIVE ANALYSIS OF INSTITUTIONAL CHANGE GOVERNING USE OF COMMON-POOL RESOURCES IN AFRICAN FLOODPLAINS	2010	SHC	NO ACCESS	NO ACCESS
Hallstrom L K; White W ; Dolan H ;	Special Issue: From rural research to policy and back again	2012	SHC	Study topic	EXCLUDED
Hamzah Amran ; Mohamad Nor Haniza;	Critical success factors of community based ecotouris: Case study of Miso Walaihomestay, Kinabatangan, Sabah	2012	MCM	Qualitative data	EXCLUDED
Haque Md R; Chowdhury N K; Khan M H; Ahmed R ; Rahman M M; Nishat A ;	Swamp forest restoration in Haor area for livelihood security - A community based approach	2004	SHC	Cannot locate	CANNOT LOCATE
Hares Minna ;	Forest conflict in Thailand: northern minorities in focus.	2009	SHC	Qualitative data	EXCLUDED
Hartshorn G S;	ECOLOGICAL BASIS FOR SUSTAINABLE DEVELOPMENT IN TROPICAL FORESTS	1995	MCM	Narrative	EXCLUDED
Hartter Joel ; Goldman Abraham ;	Local responses to a forest park in western Uganda: alternate narratives on fortress conservation	2010	MCM	No comparisons	EXCLUDED
Hartter Joel ; Goldman Abraham C;	Life on the Edge: Balancing Biodiversity, Conservation, and Sustaining Rural Livelihoods around Kibale National Park, Uganda	2009	MCM	Qualitative data	EXCLUDED
Haruni A K. O;	Unleashing development potential by promoting community service providers in demandled agroforestry service provision	2014	SHC	Not forest	EXCLUDED
Hassan Sher ; Al-Yemeni M ; Hazrat Sher ;	Forest resource utilization assessment for economic development of rural community in northern parts of Pakistan	2010	SHC	Daily use	EXCLUDED
HAYES TANYA M;	Payment for ecosystem services, sustained behavioural change, and adaptive management: peasant perspectives in the Colombian Andes	2012	SHC	No outcomes	EXCLUDED
He J ;	Globalised forest-products: commodification of the matsutake mushroom in Tibetan villages, Yunnan, Southwest China	2010	SHC	Qualitative data	EXCLUDED
Hegde R ; Enters T ;	Forest products and household economy: a case study from Mudumalai Wildlife Sanctuary, Southern India	2000	JE	No intervention	EXCLUDED
Hendrickson CY ; Corbera E ;	Participation dynamics and institutional change in the Scolel Te carbon forestry project, Chiapas, Mexico	2015	SHC	Case study	EXCLUDED
Henson Adam ; Williams David ; Dupain Jef ; Gichohi Helen ; Muruthi Philip ;	The Heartland Conservation Process: enhancing biodiversity conservation and livelihoods through landscape-scale conservation planning in Africa	2009	MCM	Narrative	EXCLUDED
Hepburn Cameron J; Koundouri Phoebe ;	Recent advances in discounting: Implications for forest economics	2007	SHC	Study topic	EXCLUDED
Herrmann Thora Martina; Torri Maria-Costanza ;	Changing forest conservation and management paradigms: traditional ecological knowledge systems and sustainable forestry: Perspectives from Chile and India	2009	SHC	No comparisons	EXCLUDED
Herrold-Menzies Melinda ;	From Adversary to Partner: The Evolving Role of Caohai Nature Reserve in the Lives of Reserve Residents	2006	MCM	Qualitative data	EXCLUDED
Herrold-Menzies Melinda ;	Spies in the Marsh or Post-Soviet Saviors? Crane Conservation and Community Outreach in the Russian Far East	2012	SHC	Qualitative data	EXCLUDED
Herruzo AC ; Martinez-Jauregui M ; Carranza J ; Campos P ;	Commercial income and capital of hunting: an application to forest estates in Andalucia	2016	SHC	No outcomes	EXCLUDED
Heyman W D; Stronza A ;	South-South exchanges enhance resource management and biodiversity conservation at various scales	2011	SHC	Narrative case study	EXCLUDED
Hibbard Michael ; Lurie Susan ;	The New Natural Resource Economy: Environment and Economy in Transitional Rural Communities	2013	SHC	Narrative case study	EXCLUDED
Hilhorst T ;	Access to and control over resources	2003	SHC		CANNOT LOCATE
Hill R D;	Trajectories of change in marginal and critical regions in Southeast Asia and Southern China	2000	SHC		NO ACCESS
Hill W ; Byrne J ; Pegas FD ;	The ecotourism-extraction nexus and its implications for the long-term sustainability of protected areas: what is being sustained and who decides?	2016	SHC	Not forest	EXCLUDED
Himberg N a; Omoro L b; Pellikka P a; Luukkanen O b;	The benefits and constraints of participation in forest management. The case of Taita hills, Kenya	2009	MCM	Qualitative data	EXCLUDED
Hirota I ; Koyama T ; Ingxay P ;	Mountainous Livelihood in Northern Laos: Historical Transition and Current Situation of a Swidden Village	2014	SHC	Study design	EXCLUDED
Hirsch Paul D; Adams William M; Brosius J Peter; Zia Asim ; Bariola Nino ; Dammert Juan Luis;	Acknowledging Conservation Trade-Offs and Embracing Complexity	2011	SHC	Study topic	EXCLUDED
Hoang HTN ; Hoshino S ; Hashimoto S ;	Forest stewardship council certificate for a group of planters in Vietnam: SWOT analysis and implications	2015	SHC	No comparisons	EXCLUDED
Hodgdon Benjamin D; Hayward Jeffrey ; Samayoa Omar ;	Putting the plus first: community forest enterprise as the platform for REDD plus in the Maya Biosphere Reserve, Guatemala	2013	SHC	Narrative	EXCLUDED
HOEKSTRA D A;	FACTORS INFLUENCING THE ECONOMIC VIABILITY OF 3 AGROFORESTRY SYSTEMS IN EASTERN AND SOUTHERN AFRICA	1994	SHC	Study design	EXCLUDED
HONEY-ROSÉS JORDI ; LÓPEZ-GARCÍA JOSÉ ; RENDÓN-SALINAS EDUARDO ; PERALTA-HIGUERA ARMANDO ; GALINDO-LEAL CARLOS ;	To pay or not to pay? Monitoring performance and enforcing conditionality when paying for forest conservation in Mexico	2009	SHC	Study topic	EXCLUDED
Hoole A ; Berkes F ;	Breaking down fences: Recoupling social--ecological systems for biodiversity conservation in Namibia	2010	SHC	Qualitative data	EXCLUDED
Horn Christa M; Gilmore Michael P; Endress Bryan A;	Ecological and socio-economic factors influencing aguaje (Mauritia flexuosa) resource management in two indigenous communities in the Peruvian Amazon	2012	MCM	No comparisons	EXCLUDED
Horton L R;	Buying Up Nature: Economic and Social Impacts of Costa Rica's Ecotourism Boom	2009	MCM	Qualitative data	EXCLUDED
Hoskins M ; Falconer J ; Ogden C ; Floret A ; Arnold J E. M;	Forestry and food security	1990	SHC	Review	EXCLUDED
HOSKINS M W;	FORESTRY, FOOD SECURITY AND NUTRITION - STRENGTHENING LINKS BETWEEN FAO AND THE ACADEMIC-RESEARCH COMMUNITY	1993	SHC		CANNOT LOCATE
Houessou L G; Lougbegnon T O; Gbesso F G. H; Anagonou L E. S; Sinsin B ;	Ethno-botanical study of the African star apple (Chrysophyllum albidum G. Don) in the southern Benin (West Africa)	2012	SHC	Daily use	EXCLUDED
Howard Sarah M;	Land Conflict and Mayangna Territorial Rights in Nicaragua's Bosawás Reserve	1998	MCM	Qualitative data	EXCLUDED
Howson P ; Kindon S ;	Analysing access to the local REDD plus benefits of Sungai Lamandau, Central Kalimantan, Indonesia	2015	SHC	Qualitative data	EXCLUDED
Huang Ji ; Long ChunLin ;	Traditional cultivation of Coptis teeta and its values in biodiversity conservation	2006	SHC	Non-English	EXCLUDED
Huber Franz K; Ineichen Robert ; Yang Yongping ; Weckerle Caroline S;	Livelihood and Conservation Aspects of Non-wood Forest Product Collection in the Shaxi Valley, Southwest China	2010	MCM	No comparisons	EXCLUDED
Hull R B; Ashton S ;	Forest cooperatives revisited	2008	SHC	Narrative case study	EXCLUDED
Hummel-Gumalius B ; Lange A ;	Women within an agroforestry project in Kenya: a case study of women's working conditions and their use of family planning services - is there a link?	1997	SHC	CANNOT LOCATE	CANNOT LOCATE
Hunter I R; Hobley M ; Smale P ;	Afforestation of degraded land - Pyrrhic victory over economic, social and ecological reality?	1998	SHC	No outcomes	EXCLUDED
Huntsinger Lynn ; Johnson Martin ; Stafford Monica ; Fried Jeremy ;	Hardwood Rangeland Landowners in California from 1985 to 2004: Production, Ecosystem Services, and Permanence	2010	SHC	No outcomes	EXCLUDED
Huong Tran Thi Thu; Zeller Manfred ; Hoanh Chu Thai;	The 'Five Million Hectare Reforestation Program' in Vietnam: An Analysis of Its Implementation and Transaction Costs: A Case Study in Hoa Binh Province	2014	SHC	Qualitative data	EXCLUDED
Hyakumura K ; Inoue M ;	The significance of social capital in local forest management in Laos: Overcoming latent conflict between local people and local forestry officials	2006	SHC	No comparisons	EXCLUDED
Hyakumura Kimihiko ;	‘Slippage’ in the Implementation of Forest Policy by Local Officials: A Case Study of a Protected Area Management in Lao PDR	2010	SHC	Narrative case study	EXCLUDED
Hyttinen P ; Kola J ;	Farm forests and rural livelihood in Finland	1995	SHC	Irrelevant intervention	EXCLUDED
Ibesoa Mendelova Zemedelska a Lesnicka Univ; Brno Czech Republic). Lesnicka a Drevarska Fakulta, J M;	Perception of the forest by the villagers of the Salonga National Park in the Democratic Republic of Congo	2009	SHC	Qualitative data	EXCLUDED
Idol Travis ; Haggar Jeremy ; Cox Linda ;	Ecosystem Services from Smallholder Forestry and Agroforestry in the Tropics	2011	SHC	BOOK	EXCLUDED
Idumah F O; Akintan A O;	Contribution of agroforestry to food production and income generation in Sapoba forest area, Edo State, Nigeria	2014	SHC	No comparisons	EXCLUDED
Ijang Tata Precillia; Cleto Ndikumagenge ;	Dependency on natural resources: post-conflict challenges for livelihoods security and environmental sustainability in Goma, The Democratic Republic of Congo	2013	SHC	Qualitative data	EXCLUDED
Illukpitiya Prabodh ; Yanagida John F;	Role of income diversification in protecting natural forests: evidence from rural households in forest margins of Sri Lanka	2008	SHC	No comparisons	EXCLUDED
Indrajeet Prasad ; Siddiqui M H;	Socio-economic status of villages of Mahilong Horhap forest beat areas of Ranchi East Forest Division	2009	SHC	CANNOT LOCATE	CANNOT LOCATE
Ingalls ML ; Dwyer MB ;	Missing the forest for the trees? Navigating the trade-offs between mitigation and adaptation under REDD	2016	SHC	No outcomes	EXCLUDED
Ingram V ; Njikeu J ;	Sweet, sticky, and sustainable social business	2011	SHC	Narrative	EXCLUDED
Irawanti S ; Ginoga KL ; Prawestisuka A ; Race D ;	Commercialising Community Forestry in Indonesia: Lessons About the Barriers and Opportunities in Central Java	2014	SHC	Narrative case study	EXCLUDED
Islam KK ; Jose S ; Tani M ; Hyakumura K ; Krott M ; Sato N ;	Does actor power impede outcomes in participatory agroforestry approach? Evidence from Sal forests area, Bangladesh	2015	SHC	No comparison	EXCLUDED
Ituarte-Lima C ; McDermott CL ; Mulyani M ;	Assessing equity in national legal frameworks for REDD plus : The case of Indonesia	2014	SHC	Not discrete humans	EXCLUDED
Iwasaki S ; Shaw R ;	INTEGRATED LAGOON FISHERIES MANAGEMENT: RESOURCE DYNAMICS AND ADAPTATION PREFACE	2010	SHC	BOOK	EXCLUDED
Jaba Debbarma ; Dipankar Deb ; Sourabh Deb ;	Tree diversity and sociocultural significance of homegardens in the Baramura range, Tripura, North-east India	2016	SHC	No outcomes	EXCLUDED
Jackson Louise ; van Noordwijk ; Meine ; Bengtsson Janne ; Foster William ; Lipper Leslie ; Pulleman Mirjam ; Said Mohammed ; Snaddon Jake ; Vodouhe Raymond ;	Biodiversity and agricultural sustainagility: from assessment to adaptive management	2010	SHC	Study design	EXCLUDED
Jacobson S K;	Evaluation model for developing, implementing, and assessing conservation education programs: Examples from Belize and Costa Rica	1991	SHC	Narrative case study	EXCLUDED
Jagger P ; Luckert MK ; Duchelle AE ; Lund JF ; Sunderlin WD ;	Tenure and Forest Income: Observations from a Global Study on Forests and Poverty	2014	SHC	No discrete population	EXCLUDED
Jagger Pamela ; Pender John ;	The role of trees for sustainable management of less-favored lands: the case of eucalyptus in Ethiopia	2003	MCM	No comparisons	EXCLUDED
Jalilova G ; Khadka C ; Vacik H ;	Developing criteria and indicators for evaluating sustainable forest management: A case study in Kyrgyzstan	2012	SHC	No outcomes	EXCLUDED
Jamnadass R ; Place F ; Torquebiau E ; Malezieux E ; Iiyama M ; Sileshi G W; Kehlenbeck K ; Masters E ; McMullin S ; Dawson I K;	Agroforestry for food and nutritional security	2013	SHC	REVIEW	EXCLUDED
Jansen H G. P; Pender J ; Damon A ; Schipper R ;	Rural development policies and sustainable land use in the Hillside Areas of Honduras: A quantitative livelihoods approach	2006	SHC	Irrelevant intervention	EXCLUDED
Jay VA ; Dillon A ;	Modelling the outcomes of different silvicultural approaches in the private native forests of north-eastern New South Wales	2016	SHC	Modelling	EXCLUDED
Jazib M J; Rather S A;	An ethno-botanical overview of oak: a multipurpose wild tree species of the Pir Panjal Himalayas	2015	SHC	No comparisons	EXCLUDED
Jensen Ditte Holm;	Poverty Alleviation in Tanzania - Forest Reserve Access for villagers of Kidabaga	2005	SHC	Qualitative data	EXCLUDED
Jitpakdee Rungrawee ; Thapa Gopal Bahadur;	Sustainability Analysis of Ecotourism on Yao Noi Island, Thailand	2012	SHC	Not forest	EXCLUDED
Johansson K E; Nantongo C ; Gondo P ; Roos A ; Kleinschmit D ;	Community based forest groups in Eastern and Southern Africa - a study of prospects for capacity improvement	2013	SHC	NO ACCESS	NO ACCESS
Joshi M L; Bliss J C; Bailey C ; Teeter L J; Ward K J;	Investing in industry, underinvesting in human capital: Forest-based rural development in Alabama	2000	SHC	No intervention	EXCLUDED
Joshi N K; Singh V ;	Traditional ecological knowledge of mountain people: foundation for sustainable development in the Hindu Kush-Himalayan Region	2010	SHC	NO ACCESS	NO ACCESS
Jumbe Charles B L; Angelsen Arild ;	Forest dependence and participation in CPR management: Empirical evidence from forest co-management in Malawi	2007	SHC	No outcomes	EXCLUDED
Just R E; Hueth D L; Schmitz A ;	The Welfare Economics of Public Policy: A Practical Approach to Project and Policy Evaluation	2004	SHC	BOOK	EXCLUDED
Kalaba F K; Quinn C H; Dougill A J;	Contribution of forest provisioning ecosystem services to rural livelihoods in the Miombo woodlands of Zambia	2013	MCM	No intervention	EXCLUDED
Kalame Fobissie B; Aidoo Robert ; Nkem Johnson ; Ajayie Oluyede C; Kanninen Markku ; Luukkanen Olavi ; Idinoba Monica ;	Modified taungya system in Ghana: a win–win practice for forestry and adaptation to climate change?	2011	SHC	No comparison	EXCLUDED
Kalliola Risto ; Flores Pedro ;	Brazil nut harvesting in Peruvian Amazonia from the perspective of ecosystem services	2011	SHC	No outcome	EXCLUDED
Kambona Ouma ; O ; Stadel C ;	Kakamega Forest, ecotourism and rural livelihoods: Linkages and interactions for the Kakamega Forest region, Western Kenya	2006	SHC	No comparison	EXCLUDED
Kamoto J ; Clarkson G ; Dorward P ; Shepherd D ;	Doing more harm than good? Community based natural resource management and the neglect of local institutions in policy development	2013	SHC	No comparison	EXCLUDED
Kang Hag Mo; Kohroki Katsuhisa ;	A study on forestry successors in Korea focused on forestry successors inGueonggi province	2008	SHC	No outcome	EXCLUDED
Kang Hag Mo; Lee Sang Hyun; Kim Hyun ; Sato Noriko ;	Study on Gathering and Production Structure of Pine Nuts in Korea - Centering on Gapyeong-gun, Gyeonggi-do and Hongcheon-gun, Gangwon-do	2010	SHC	No comparison	EXCLUDED
Kangalawe R Y. M; Noe C ;	Biodiversity conservation and poverty alleviation in Namtumbo District, Tanzania	2012	MCM	No comparisons	EXCLUDED
Kar S P; Jacobson M G;	Market constraints in NTFP trade: household perspectives in Chittagong Hill Tracts of Bangladesh	2012	SHC	No outcome	EXCLUDED
Kari Susanna ; Korhonen-Kurki Kaisa ;	Framing local outcomes of biodiversity conservation through ecosystem services: A case study from Ranomafana, Madagascar	2013	SHC	No comparison	EXCLUDED
Kassa H ; Campbell B ; Sandewall M ; Kebede M ; Tesfaye Y ; Dessie G ; Seifu A ; Tadesse M ; Garedew E ; Sandewall K ;	Building future scenarios and uncovering persisting challenges of participatory forest management in Chilimo Forest, Central Ethiopia	2009	SHC	Modelling	EXCLUDED
Katani Josiah Z; Babili Innocent H;	Exploring forest governance in Tanzania	2012	SHC	BOOK	EXCLUDED
Katel Om N; Schmidt-Vogt Dietrich ;	Use of Forest Resources by Residents of Jigme Singye Wangchuck National Park, Bhutan	2011	MCM	Qualitative data	EXCLUDED
Kausar R a; Mirza S N.a; Saboor A b; Saleem A a; Khalid B c;	Role of ecotourism in promoting and sustaining conservation of nature: A case study of murree forest recreational resort	2013	SHC	No outcome	EXCLUDED
Kaushal K K; Kala J C;	Applying the sustainable livelihood approach to joint forest management projects in India	2004	SHC	No comparisons	EXCLUDED
Kaushal Kumar ; Abbas S G; Siddiqui M H;	Issue on establishment of forest products processing unit under the concept of Smart Village	2016	SHC	CANNOT LOCATE	CANNOT LOCATE
Kayambazinthu D ; Barany M ; Mumba R ; Anyonge C H;	Miombo woodlands and HIV/AIDS interactions: Malawi country report	2005	SHC	No outcome	EXCLUDED
Kayser D ; Sobrevila C ; Ledec G ;	From Planning to the Implementation of a Successful Conservation and Socio-Economic Model	2011	SHC	Study design	EXCLUDED
Kellert Stephen R; Mehta Jai N; Ebbin Syma a; Lichtenfield Laly L;	Community Natural Resource Management : Promise , Rhetoric , and Reality Community Natural Resource Management :	2000	SHC	No outcomes	EXCLUDED
Kengni E ; Mbofung C M. F; Tchouanguep M F; Tchoundjeu Z ;	The nutritional role of indigenous foods in mitigating the HIV/AIDS crisis in West and Central Africa	2004	SHC	Potential outcomes	EXCLUDED
KEPE T ;	USE, CONTROL AND VALUE OF CRAFT MATERIAL— <i>CYPERUS TEXTILIS</i> : PERSPECTIVES FROM A MPONDO VILLAGE, SOUTH AFRICA	2003	SHC	Qualitative data	EXCLUDED
Kepe Thembela ;	<i>Cannabis sativa</i> and rural livelihoods in South Africa: politics of cultivation, trade and value in Pondoland	2003	SHC	Irrelevant study topic	EXCLUDED
Kepe Thembela ;	Social Dynamics of the Value of Wild Edible Leaves ( <i>Imifino</i> ) in a South African Rural Area	2008	SHC	Qualitative data	EXCLUDED
Kepe Thembela ;	Beyond the numbers: Understanding the value of vegetation to rural livelihoods in Africa	2008	SHC	Study topic	EXCLUDED
Keskitalo E C H; Lundmark L ;	The controversy over protected areas and forest-sector employment in Norrbotten, Sweden: forest stakeholder perceptions and statistics	2009	SHC	No intervention	EXCLUDED
Khadka M ; Karki S ; Karky BS ; Kotru R ; Darjee KB ;	Gender Equality Challenges to the REDD plus Initiative in Nepal	2014	SHC	Qualitative data	EXCLUDED
Khalumba M ; Wunscher T ; Wunder S ; Budenbender M ; Holm-Muller K ;	Combining Auctions and Performance- Based Payments in a Forest Enrichment Field Trial in Western Kenya	2014	SHC	No comparisons	EXCLUDED
Khalyani J H; Namiranian M ; Vaezin S M. H; Feghhi J ;	Development and evaluation of local communities incentive programs for improving the traditional forest management: A case study of Northern Zagros forests, Iran	2013	MCM	No comparisons	EXCLUDED
Khan N A;	PARTICIPATION IN SOUTH ASIAN SOCIAL FORESTRY - CHASING A MIRAGE	1994	SHC	CANNOT LOCATE	CANNOT LOCATE
Khan Smmh ; Haque C E;	Wetland resource management in Bangladesh: Implications for marginalization and vulnerability of local harvesters	2010	SHC	Study design	EXCLUDED
Khatri T B;	Conservation governance in Nepal: Protecting forest biodiversity and people's livelihoods	2010	MCM	No comparisons	EXCLUDED
Kimaro J ; Lulandala L ;	Contribution of non-timber forest products to poverty alleviation and forest conservation in Rufiji District - Tanzania	2013	SHC	No comparisons	EXCLUDED
Kimura D ;	Special Issue: Present situation and future prospects of nutrition acquisition in African tropical forest	2015	SHC	Study design	EXCLUDED
KINHAL G A; NARAYAN K R;	TRIBAL DEPENDENCE ON FORESTS - CASE-STUDIES FROM RAJASTHAN	1994	SHC	NO ACCESS	NO ACCESS
Kitamura Kenji ; Clapp Roger Alex;	Common property protected areas: Community control in forest conservation	2013	MCM	No comparisons	EXCLUDED
Klooster D ;	Campesinos and Mexican forest policy during the twentieth century	2003	SHC	REVIEW	EXCLUDED
Kolinjivadi V K; Sunderland T ;	A review of two payment schemes for watershed services from China and Vietnam: The interface of government control and PES theory	2012	SHC	REVIEW	EXCLUDED
Kongsager R ; Corbera E ;	Linking Mitigation and Adaptation in Carbon Forestry Projects: Evidence from Belize	2015	SHC	No comparisons	EXCLUDED
Konig HJ ; Zhen L ; Helming K ; Uthes S ; Yang L ; Cao X ; Wiggering H ;	ASSESSING THE IMPACT OF THE SLOPING LAND CONVERSION PROGRAMME ON RURAL SUSTAINABILITY IN GUYUAN, WESTERN CHINA	2014	SHC	Study design	EXCLUDED
Kosoy N ; Corbera E ; Brown K ;	Participation in payments for ecosystem services: Case studies from the Lacandon rainforest, Mexico	2008	SHC	Qualitative data	EXCLUDED
Kotkova H ; Verner V ;	SIGNIFICANCE OF NON-TIMBER FOREST PRODUCTS COMMERCIALIZATION IN RURAL AREAS OF PERUVIAN AMAZON	2014	SHC	NO ACCESS	NO ACCESS
Kotru Rajan ;	Participatory Forest Management and Sustainable Development Outcomes in the Subtropical Himalayas: A Sequel of Environment, Economy and Equity through Social Empowerment	2011	SHC	BOOK	EXCLUDED
Koyuncu Cuneyt ; Yilmaz Rasim ;	Impact of private forest ownership on deforestation and poverty	2013	SHC	Not discrete humans	EXCLUDED
Krajnc N ; Domac J ;	How to model different socio-economic and environmental aspects of biomass utilisation: Case study in selected regions in Slovenia and Croatia	2007	SHC	Modeling	EXCLUDED
Krause Torsten ; Loft Lasse ;	Benefit Distribution and Equity in Ecuador's Socio Bosque Program	2013	SHC	Not discrete humans	EXCLUDED
Krause Torsten ; Zambonino Heleana ;	More than just trees – animal species diversity and participatory forest monitoring in the Ecuadorian Amazon	2013	SHC	No comparisons	EXCLUDED
Kremen C ; Niles J O; Dalton M G; Daily G C; Ehrlich P R; Fay J P; Grewal D ; Guillery R P;	Economic Incentives for Rain Forest Conservation Across Scales	2000	MCM	Potential outcomes	EXCLUDED
Kristjanson P ; Neufeldt H ; Gassner A ; Mango J ; Kyazze F B; Desta S ; Sayula G ; Thiede B ; Förch W ; Thornton P K; Coe R ;	Are food insecure smallholder households making changes in their farming practices? Evidence from East Africa	2012	SHC	Irrelevant study topic	EXCLUDED
Kubo Hideyuki ;	Diffusion of policy discourse into rural spheres through co-management of state forestlands: Two cases from West Java, Indonesia	2008	SHC	Qualitative data	EXCLUDED
Kuhlman T ; Coulibaly K ; Yago E L; Michels R ; Berg J van den;	Fruit trees in the rural economy of the Sahel; the case of Burkina Faso and Mali Les arbres fruitiers saheliens dans l'economie rurale. Cas du Burkina Faso et du Mali	2010	SHC	Non-English	EXCLUDED
Kumar K ; Kerr J M;	Territorialisation and marginalisation in the forested landscapes of Orissa, India	2013	SHC	Study design	EXCLUDED
Kumar Ritesh ; Horwitz Pierre ; Milton G Randy; Sellamuttu Sonali S; Buckton Sebastian T; Davidson Nick C; Pattnaik Ajit K; Zavagli Monica ; Baker Chris ;	Assessing wetland ecosystem services and poverty interlinkages: a general framework and case study	2011	MCM	No comparisons	EXCLUDED
Kümpel Noëlle F; Milner-Gulland E J; Cowlishaw Guy ; Rowcliffe J Marcus;	Incentives for Hunting: The Role of Bushmeat in the Household Economy in Rural Equatorial Guinea	2010	SHC	No outcome	EXCLUDED
Kumria P ; Singh RB ; Kimoto K ;	Institutional Dimensions and Changing Role of Forest Management Governance in Dehradun Valley	2016	SHC	BOOK	EXCLUDED
Kurttila M ; Uuttera J ; Mykra S ; Kurki S ; Pukkala T ;	Decreasing the fragmentation of old forests in landscapes involving multiple ownership in Finland: economic, social and ecological consequences	2002	SHC	No outcomes	EXCLUDED
Kusters K ; de Foresta ; H ; Ekadinata A ; van Noordwijk ; M ;	Towards solutions for state vs. local community conflicts over forestland: The impact of formal recognition of user rights in Krui, Sumatra, Indonesia	2007	SHC	No outcomes	EXCLUDED
Kusters Koen ; Achdiawan Ramadhani ; Belcher Brian ; Ruiz Pérez ; Manuel ;	Balancing Development and Conservation? An Assessment of Livelihood and Environmental Outcomes of Non Timber Forest Product Trade in Asia, Africa, and Latin America	2006	MCM	No outcome	EXCLUDED
Kwesiga F ; Akinnifesi F K; Mafongoya P L; McDermott M H; Agumya A ;	Agroforestry research and development in southern Africa during the 1990s: review and challenges ahead	2003	SHC	REVIEW	EXCLUDED
LAARMAN J G; STEWART E J; DUGAN P C;	THE ECONOMICS OF EXTRACTION IN PHILIPPINE FORESTS - WHEN TIMBER TURNS TO GOLD	1995	SHC	Narrative	EXCLUDED
Lachapelle P R; Smith P D; McCool S F;	Access to power or genuine empowerment? An analysis of three community forest groups in Nepal	2004	SHC	Qualitative data	EXCLUDED
Lacuna-Richman C ; Devkota BP ; Richman MA ;	Users' priorities for good governance in community forestry: Two cases from Nepal's Terai Region	2016	SHC	Qualitative data	EXCLUDED
Lai Q ;	Community participation in the management of nature reserves: Experiences and lessons from China	2003	SHC	Qualitative data	EXCLUDED
Laird S A; Awung G L; Lysinge R J; Ndive L E;	The interweave of people and place: biocultural diversity in migrant and indigenous livelihoods around Mount Cameroon	2011	SHC	Daily use	EXCLUDED
Laird Sarah A; Awung Gabriel Leke; Lysinge Rita J;	Cocoa farms in the Mount Cameroon region: biological and cultural diversity in local livelihoods	2007	SHC	No comparisons	EXCLUDED
Lamb J N; Moore K M; Smith R ;	Pursuing community forestry in Liberia	2009	SHC	Study design	EXCLUDED
Lambert J ; Srivastava J ; Vietmeyer N ;	Medicinal plants rescuing a global heritage	1997	SHC	Book	EXCLUDED
Lambrick FH ; Brown ND ; Lawrence A ; Bebber DP ;	Effectiveness of Community Forestry in Prey Long Forest, Cambodia	2014	SHC	Environmental outcomes only	EXCLUDED
Landekic M ;	Organizational culture and occupational safety in the Croatian forestry sector: review of current research in the light of 3rd international professional-scientific conference "Occupational safety and health", Zadar, 14-16. 9. 2010 Organizacijska kultura i sigurnost pri radu u hrvatskom sumarskom sektoru: prikaz aktualnih istrazivanja u svjetlu 3. medunarodnog strucno-znanstvenog skupa "Zastita n…	2010	SHC	Non-English	EXCLUDED
Landell-Mills N ;	Developing markets for forest environmental services: An opportunity for promoting equity while securing efficiency?	2002	SHC	Study design	EXCLUDED
Landon-Lane C ;	Benefits of viable home gardens for family health and sustainable livelihoods | Poverty and Conservation	2004	SHC	No methods	EXCLUDED
Landreth N ; Saito O ;	An Ecosystem Services Approach to Sustainable Livelihoods in the Homegardens of Kandy, Sri Lanka	2014	SHC	No comparisons	EXCLUDED
Larson Anne M;	Forest tenure reform in the age of climate change: Lessons for REDD+	2011	SHC	No comparisons	EXCLUDED
Larson Anne M; Brockhaus Maria ; Sunderlin William D; Duchelle Amy ; Babon Andrea ; Dokken Therese ; Pham Thu Thuy; Resosudarmo I A P; Selaya Galia ; Awono Abdon ; Huynh Thu-Ba ;	Land tenure and REDD plus : The good, the bad and the ugly	2013	SHC	Qualitative data	EXCLUDED
Larson Anne M; Ribot Jesse C;	The poverty of forestry policy: double standards on an uneven playing field	2007	SHC	Study design	EXCLUDED
Larson Anne M; Soto Fernanda ;	Decentralization of Natural Resource Governance Regimes	2008	SHC	REVIEW	EXCLUDED
Lawlor K ; Madeira E M; Blockhus J ; Ganz D J;	Community Participation and Benefits in REDD plus : A Review of Initial Outcomes and Lessons	2013	SHC	No comparisons	EXCLUDED
Lawrence A ;	No forest without timber?	2003	SHC	Study design	EXCLUDED
Lawrence A ; Anglezarke B ; Frost B ; Nolan R ; Owen R ;	What does community forestry mean in a devolved Great Britain?	2009	SHC	Environmental outcomes only	EXCLUDED
Le H ;	Economic reforms and mangrove forests in Central Vietnam	2008	SHC	Narrative case study	EXCLUDED
Leahy J E; Anderson D H;	"Cooperation gets it done": Social capital in natural resources management along the Kaskaskia River	2010	SHC	Qualitative data	EXCLUDED
Leake Nancy ; Adamowicz Wiktor L; Boxall Peter C;	An econometric analysis of the effect of forest dependence on the economic well-being of Canadian communities	2006	SHC	Not discrete humans	EXCLUDED
Leakey R R B; Simons A J;	The domestication and commercialization of indigenous trees in agroforestry for the alleviation of poverty	1997	SHC	No outcomes	EXCLUDED
Leakey R R B; Tchoundjeu Z ;	Diversification of tree crops: Domestication of companion crops for poverty reduction and environmental services	2001	SHC	REVIEW	EXCLUDED
Leatherman J C; Marcouiller D W;	Income distribution characteristics of rural economic sectors: Implications for local development policy	1996	SHC	Not forest	EXCLUDED
Lee TienMing ; Sigouin A ; Pinedo-Vasquez M ; Nasi R ;	The harvest of wildlife for bushmeat and traditional medicine in East, South and Southeast Asia: current knowledge base, challenges, opportunities and areas for future research	2014	SHC	No intervention	EXCLUDED
Leggett Matthew ; Lovell Heather ;	Community perceptions of REDD+: a case study from Papua New Guinea	2012	SHC	Narrative case study	EXCLUDED
Lemenih M ; Kassa H ;	Re-Greening Ethiopia: History, Challenges and Lessons	2014	SHC	Study design	EXCLUDED
Lemenih Mulugeta ; Abebe Tarekegn ; Olsson Mats ;	Gum and resin resources from some Acacia, Boswellia and Commiphora species and their economic contributions in Liban, south-east Ethiopia	2003	SHC	NO comparisons	EXCLUDED
Lengkeek A ; Oldenkamp L ;	About AIDS, rural problems and agroforestry. Unbalanced rural communities require adapted development Over AIDS, rurale problemen en agroforestry. Ontwrichte plattelandsgemeenschappen vergen aangepaste ontwikkeling	2005	SHC	CANNOT LOCATE	CANNOT LOCATE
Lescuyer G ; Cerutti P O; Robiglio V ;	Artisanal chainsaw milling to support decentralized management of timber in Central Africa? An analysis through the theory of access	2013	SHC	No comparisons	EXCLUDED
Lestari S ; Kotani K ; Kakinaka M ;	Enhancing voluntary participation in community collaborative forest management: A case of Central Java, Indonesia	2015	SHC	No comparisons	EXCLUDED
Letsela Taelo ; Witkowski Edward T. F; Balkwill Kevin ;	Direct use values of communal resources in Bokong and Tsehlanyane in Lesotho: whither the commons?	2002	SHC	No comparisons	EXCLUDED
Li J ; Bluemling B ; Dries L ;	Property Rights Effects on Farmers' Management Investment in Forestry Projects: The Case of Camellia in Jiangxi, China	2016	SHC	No outcomes	EXCLUDED
Li J ; Tuo H W; Liu X P;	On the Factors Influencing the Participatory Forest Management in Rural Communities in the West of China	2009	SHC	NO ACCESS	NO ACCESS
Liebenow Danielle King; Cohen Matthew J; Gumbricht Thomas ; Shepherd Keith D; Shepherd Gemma ;	Do ecosystem services influence household wealth in rural Mali?	2012	SHC	Not forest	EXCLUDED
Lilieholm Robert J; Weatherly W Paul;	Kibale Forest Wild Coffee: Challenges to Market-Based Conservation in Africa	2010	SHC	No outcomes	EXCLUDED
Lim HinFui ;	Orang Asli, forest and development	1997	SHC	NO ACCESS	NO ACCESS
Lindström Sara ; Mattsson Eskil ; Nissanka S P;	Forest cover change in Sri Lanka: The role of small scale farmers	2012	MCM	Qualitative data	EXCLUDED
Ling E ;	Socio-economic evaluation of intercropped grevillea on small-scale farms in Kerugoya District, Kenya	1993	SHC	CANNOT LOCATE	CANNOT LOCATE
Liscow Zachary D;	Do property rights promote investment but cause deforestation? Quasi-experimental evidence from Nicaragua	2013	SHC	No intervention	EXCLUDED
Lise W ;	Factors influencing people's participation in forest management in India	2000	SHC	No comparisons	EXCLUDED
Liu C ; Yin R ;	Poverty dynamics revealed in production performance and forestry in improving livelihoods: The case of West Anhui, China	2004	SHC	No intervention	EXCLUDED
Liu G B;	Soil conservation and sustainable agriculture on the Loess Plateau: Challenges and prospects	1999	SHC	No outcomes	EXCLUDED
Liu J L; Zhang R H; Zhang Q Y;	Traditional forest knowledge of the Yi people confronting policy reform and social changes in Yunnan province of China	2012	SHC	Study design	EXCLUDED
Liu Jianguo ; Li Shuxin ; Ouyang Zhiyun ; Tam Christine ; Chen Xiaodong ;	Ecological and socioeconomic effects of China's policies for ecosystem services.	2008	MCM	No discrete population	EXCLUDED
Liu Jing ; Ouyang Zhiyun ; Miao Hong ;	Environmental attitudes of stakeholders and their perceptions regarding protected area-community conflicts: A case study in China	2010	SHC	No outcome	EXCLUDED
Liu Wei ;	Patterns and impacts of tourism development in a coupled human and natural system	2012	MCM	THESIS	EXCLUDED
Loaiza T ; Nehren U ; Gerold G ;	REDD plus and incentives: An analysis of income generation in forest-dependent communities of the Yasuni Biosphere Reserve, Ecuador	2015	SHC	Dependency	EXCLUDED
Lobovikov M ; Schoene D ; Yping L ;	Bamboo in climate change and rural livelihoods	2012	SHC	No outcomes	EXCLUDED
Locatelli Bruno ; Evans Vanessa ; Wardell Andrew ; Andrade Angela ; Vignola Raffaele ;	Forests and Climate Change in Latin America: Linking Adaptation and Mitigation	2011	SHC	Study design	EXCLUDED
Logan B I; Moseley W G;	The political ecology of poverty alleviation in Zimbabwe's Communal Areas Management Programme for Indigenous Resources (CAMPFIRE)	2002	SHC	Study design	EXCLUDED
Lombard C ; Leakey R R. B;	Protecting the rights of farmers and communities while securing long term market access for producers of non-timber forest products: Experience in Southern Africa	2010	SHC	No comparisons	EXCLUDED
Long ChunLin ; Li Rong ; Dao ZhiLing ; Liu YiTao ; Li Heng ;	Natural resource management in the Dulong ethnic community	2004	SHC	CANNOT LOCATE	CANNOT LOCATE
Longhurst R ;	Dependency on forest and tree foods for food security: a working seminar held by the International Rural Development Centre, Swedish University of Agricultural Sciences, Uppsala, March 13-15, 1991, at the Odalgarden Conference Centre, Uppsala	1991	SHC	CANNOT LOCATE	CANNOT LOCATE
Lopez-Feldman Alejandro ; Taylor J Edward;	Labor allocation to non-timber extraction in a Mexican rainforest community	2009	SHC	No outcomes	EXCLUDED
Lopez-Feldman Alejandro ; Wilen James E;	Poverty and spatial dimensions of non-timber forest extraction	2008	SHC	No outcomes	EXCLUDED
Lu J ; Schuett M A;	Examining the role of voluntary associations in environmental management: The case of the Sam Houston national forest	2012	SHC	No outcomes	EXCLUDED
Ludwig Grit ;	Property Rights and Participation in REDD plus : The Case of Mozambique	2012	SHC	Study design	EXCLUDED
Lukuyu B ; Place F ; Franzel S ; Kiptot E ;	Disseminating Improved Practices: Are Volunteer Farmer Trainers Effective?	2012	SHC	No outcomes	EXCLUDED
Lund Jens Friis;	Is small beautiful? Village level taxation of natural resources in Tanzania	2007	SHC	No outcomes	EXCLUDED
Lund Jens Friis; Burgess Neil D; Chamshama Shabani A. O; Dons Klaus ; Isango Jack A; Kajembe George C; Meilby Henrik ; Moyo Francis ; Ngaga Yonika M; Ngowi Stephen E; Njana Marco A; Mwakalukwa Ezekiel E; Skeie Kathrine ; Theilade I D. A; Treue Thorsten ;	Mixed method approaches to evaluate conservation impact: evidence from decentralized forest management in Tanzania	2015	SHC	No outcomes	EXCLUDED
Lund Jens Friis; Saito-Jensen Moeko ;	Revisiting the Issue of Elite Capture of Participatory Initiatives	2013	SHC	Narrative case study	EXCLUDED
Lundgren T ;	Environmental protection and impact on adjacent economies: evidence from the Swedish mountain region	2009	SHC	Modeling	EXCLUDED
Lunkapis GJ ;	Secure land tenure as prerequisite towards sustainable living: a case study of native communities in Mantob village, Sabah, Malaysia	2015	SHC	Qualitative data	EXCLUDED
Lunstrum E ;	Mozambique, neoliberal land reform, and the Limpopo National Park	2008	SHC	Study design	EXCLUDED
Luoga E J; Witkowski E T. F; Balkwill K ;	Land cover and use changes in relation to the institutional framework and tenure of land and resources in eastern Tanzania Miombo woodlands	2005	SHC	No outcomes	EXCLUDED
Lyons K ; Westoby P ;	Carbon colonialism and the new land grab: Plantation forestry in Uganda and its livelihood impacts	2014	SHC	Study design	EXCLUDED
Mackenzie Catrina A; Chapman Colin A; Sengupta Raja ;	Spatial patterns of illegal resource extraction in Kibale National Park, Uganda	2012	SHC	No outcomes	EXCLUDED
Macqueen D ;	Enabling Conditions for Successful Community Forest Enterprises	2013	SHC	No comparisons	EXCLUDED
Macura B ; Secco L ; Pisani E ; Pullin AS ; Reyes-Garcia V ;	All that glitters is not gold: the effect of top-down participation on conservation knowledge, attitudes and institutional trust in a Central Indian tiger reserve	2016	SHC	No outcomes	EXCLUDED
Magcale-Macandog D B; Ranola F M; Ranola R F; Jr ; Ani P A. B; Vidal N B;	Enhancing the food security of upland farming households through agroforestry in Claveria, Misamis Oriental, Philippines	2010	SHC	No outcome	EXCLUDED
Mahanty S ; Guernier J ; Yasmi Y ;	A fair share? Sharing the benefits and costs of collaborative forest management	2009	SHC	Narrative	EXCLUDED
Mahanty Sango ; Russell Diane ;	High Stakes: Lessons from Stakeholder Groups in the Biodiversity Conservation Network	2002	SHC	Study design	EXCLUDED
Mahanty Sango ; Suich Helen ; Tacconi Luca ;	Access and benefits in payments for environmental services and implications for REDD+: Lessons from seven PES schemes	2013	SHC	No comparisons	EXCLUDED
Mahapatra A ; Mitchell C P;	Sustainable development of non-timber forest products: Implication for forest management in India	1997	SHC	No outcomes	EXCLUDED
Mahapatra Ajay Kumar; Albers Heidi J; Robinson Elizabeth J Z;	The impact of NTFP sales on rural households' cash income in India's dry deciduous forest	2005	SHC	Daily use	EXCLUDED
Mahapatra AK ; Tewari DD ; Baboo B ;	Displacement, Deprivation and Development: The Impact of Relocation on Income and Livelihood of Tribes in Similipal Tiger and Biosphere Reserve, India	2015	SHC	No outcomes	EXCLUDED
Maharana I ; Rai S ; Sharma E ;	Environmental economics of the Khangchendzonga National Park in the Sikkim Himalaya, India	2000	SHC	No outcomes	EXCLUDED
Maharjan M R;	The Flow and Distribution of Costs and Benefits in the Chuliban Community Forest, Dhankuta District, Nepal	1998	SHC	Narrative case study	EXCLUDED
Mahdi ; Shivakoti Ganesh P; Schmidt-Vogt Dietrich ;	Livelihood Change and Livelihood Sustainability in the Uplands of Lembang Subwatershed, West Sumatra, Indonesia, in a Changing Natural Resource Management Context	2009	SHC	No intervention	EXCLUDED
Mahonge C P. I;	Co-Managing Complex Social-Ecological Systems in Tanzania: The Case of Lake Jipe Wetland	2010	SHC	NO ACCESS	NO ACCESS
Mai Y H; Mwangi E ; Wan M ;	Gender analysis in forestry research: Looking back and thinking ahead	2011	SHC	Review	EXCLUDED
Maikhuri R K; Nautiyal S ; Rao K S; Chandrasekhar K ; Gavali R ; Saxena K G;	Analysis and resolution of protected area - people conflicts in Nanda Devi Biosphere Reserve, India	2000	SHC	No outcome	EXCLUDED
Maikhuri R K; Nautiyal S ; Rao K S; Saxena K G;	Conservation policy-people conflicts: a case study from Nanda Devi Biosphere Reserve (a World Heritage Site), India	2001	SHC	Study design	EXCLUDED
Maikhuri R K; Negi Vikram S; Rawat L S; Purohit V K; Phondani Prakash ; Chamoli K P; Farooquee N A;	Participatory action research framework and approaches for promoting non-timber forest products (NTFPs) in central Himalaya, Uttarakhand	2009	SHC	No outcomes	EXCLUDED
Maikhuri R K; Rao K S; Kusum Chauhan ; Kandari L S; Prasad P ; Rajasekaran C ;	Development of marketing of medicinal plants and other forest products - can it be a pathway for effective management and conservation?	2003	SHC	No outcomes	EXCLUDED
Malla Y B;	Farmers' tree management strategies in a changing rural economy, and factors influencing decisions on tree growing in Nepal	2000	SHC	Study design	EXCLUDED
Malla Y B;	Impact of community forestry policy on rural livelihoods and food security in Nepal	2000	SHC	NO ACCESS	NO ACCESS
Mallik R M;	Sustainable management of non-timber forest products in Orissa: Some issues and options	2000	SHC	Study design	EXCLUDED
Mamo Getachew ; Sjaastad Espen ; Vedeld Pal ;	Economic dependence on forest resources: A case from Dendi District, Ethiopia	2007	SHC	No outcomes	EXCLUDED
Manandhar Tara Devi; Shin Man Yong;	How community-based forest management can improve rural livelihoods: A case of Kabhre district, Nepal	2013	SHC	Narrative case study	EXCLUDED
Manish Mishra ; Kotwal P C; Mishra R P;	Indigenous practices to ensure sustainability of Baichandi Dioscorea hispida Dennst. tubers in the natural forests of Mandla district, Madhya Pradesh	2009	SHC	CANNOT LOCATE	CANNOT LOCATE
Manivong V ; Cramb R A;	The Adoption of Smallholder Rubber Production by Shifting Cultivators in Northern Laos: A Village Case Study	2008	SHC	No outcomes	EXCLUDED
Manna S ; Roy A ;	Economic contribution of wild edible mushrooms to a forest fringe ethnic community in some eastern lateritic parts of India	2014	SHC	No outcomes	EXCLUDED
Manohar Reddy ; R ;	Conservation need of tropical tasar silk insect, antheraea mylitta drury (Lepidoptera: Saturniidae)-strategies and impact	2010	SHC	Study topic	EXCLUDED
Manurung G E S; Roshetko J M; Budidarsono S ; Kurniawan I ;	Dudukuhan Tree Farming Systems in West Java: How to Mobilize Self-Strengthening of Community-Based Forest Management?	2008	SHC	No outcomes	EXCLUDED
Manyara G a b; Jones E a; Botterill D a;	Tourism and poverty alleviation: The case for indigenous enterprise development in Kenya	2006	SHC	Qualitative data	EXCLUDED
Mapfumo P ; Adjei-Nsiah S ; Mtambanengwe F ; Chikowo R ; Giller K E;	Participatory action research (PAR) as an entry point for supporting climate change adaptation by smallholder farmers in Africa	2013	SHC	Not forest	EXCLUDED
Marchant Carla ; Borsdorf Axel ;	Protected areas in Northern Colombia – on track to sustainable development?	2013	SHC	Study design	EXCLUDED
Marcouiller D W; Schreiner D F; Lewis D K;	DISTRIBUTIVE ECONOMIC-IMPACTS OF INTENSIVE TIMBER PRODUCTION	1995	SHC	No outcomes	EXCLUDED
Marfo E ;	Institutionalizing citizen participation and community representation in natural resource management: Lessons from the Social Responsibility Agreement negotiation in Ghana	2007	SHC	No comparisons	EXCLUDED
Marfo E ; Acheampong E ; Opuni-Frimpong E ;	Fractured tenure, unaccountable authority, and benefit capture: Constraints to improving community benefits under climate change mitigation schemes in Ghana	2012	SHC	Study design	EXCLUDED
Margoluis Richard Alan;	Conservation for health: Exploring the association between the small-scale commercial utilization of non-timber forest resources and human health in a tropical forest biosphere reserve	1994	MCM	NO ACCESS	NO ACCESS
Marion Suiseeya ; K R ; Caplow S ;	In pursuit of procedural justice: Lessons from an analysis of 56 forest carbon project designs	2013	SHC	No outcomes	EXCLUDED
Maroyi A ; Rasethe M T;	Comparative use patterns of plant resources in rural areas of South Africa and Zimbabwe	2015	SHC	Daily use	EXCLUDED
Marquardt K ; Khatri D ; Pain A ;	REDD plus , forest transition, agrarian change and ecosystem services in the hills of Nepal	2016	SHC	CANNOT LOCATE	CANNOT LOCATE
Marquardt Kristina ; Milestad Rebecka ; Salomonsson Lennart ;	Improved fallows: a case study of an adaptive response in Amazonian swidden farming systems	2013	SHC	No outcomes	EXCLUDED
Marschke Melissa ; Armitage Derek ; Le_Van_An ; Truong_Van_Tuyen ; Mallee Hein ;	Do collective property rights make sense? insights from central Vietnam	2012	SHC	Qualitative data	EXCLUDED
Marschke Melissa ; Berkes Fikret ;	Local level sustainability planning for livelihoods: A Cambodian experience	2005	SHC	No outcomes	EXCLUDED
Marsh R ; Hernandez I ;	The role of the traditional home garden in the household economy: case studies from Honduras and Nicaragua El papel del huerto casero tradicional en la economia del hogar: casos de Honduras y Nicaragua	1996	SHC	Non-English	EXCLUDED
Marshall E ; Newton A C;	Non-timber forest products in the community of El Terrero, Sierra de Manantlan Biosphere Reserve, Mexico: Is their use sustainable?	2003	SHC	No comparisons	EXCLUDED
Martin Adrian ; Gross-Camp Nicole ; Kebede Bereket ; McGuire Shawn ; Munyarukaza Joseph ;	Whose environmental justice? Exploring local and global perspectives in a payments for ecosystem services scheme in Rwanda	2014	SHC	Qualitative data	EXCLUDED
Martin Esmond ; Martin Chryssee ; Vigne Lucy ;	Successful reduction in rhino poaching in Nepal	2013	SHC	Study topic	EXCLUDED
Maryudi Ahmad ; Devkota Rosan R; Schusser Carsten ; Yufanyi Cornelius ; Salla Manjola ; Aurenhammer Helene ; Rotchanaphatharawit Ratchananth ; Krott Max ;	Back to basics: Considerations in evaluating the outcomes of community forestry	2012	MCM	No comparisons	EXCLUDED
Mather Richard ; De Boer ; Martin ; Gurung Meena ; Roche Nick ;	Rural Development Forestry Network Rural Development Forestry Network FROM THE FIELD Aerial Photographs and Photo-maps for Community Forestry		SHC	No outcomes	EXCLUDED
Mathur VN ; Afionis S ; Paavola J ; Dougill AJ ; Stringer LC ;	Experiences of host communities with carbon market projects: towards multi-level climate justice	2014	SHC	Narrative case study	EXCLUDED
Matose F ; Watts S ;	Towards community-based forest management in Southern Africa: Do decentralization experiments work for local livelihoods?	2010	SHC	Narrative case study	EXCLUDED
Matsvange D ; Sagonda R ; Kaundikiza M ;	The role of communities in sustainable land and forest management: The case of Nyanga, Zvimba and Guruve districts of Zimbabwe	2016	SHC	No comparisons	EXCLUDED
Matta Jagannadha R; Alavalapati Janaki R.R;	Perceptions of collective action and its success in community based natural resource management: An empirical analysis	2006	SHC	No comparisons	EXCLUDED
Matthies BD ; Karimov AA ;	Financial drivers of land use decisions: The case of smallholder woodlots in Amhara, Ethiopia	2014	SHC	No outcomes	EXCLUDED
Mayers J ; Bila A ; Khaukha S ; Opoku K ; Simwela W ;	Forest governance and social justice: Practical tactics from a learning group approach in Africa	2006	SHC	Study design	EXCLUDED
Mazur R E; Stakhanov O V;	Prospects for enhancing livelihoods, communities, and biodiversity in Africa through community-based forest management: A critical analysis	2008	SHC	Narrative case study	EXCLUDED
Mbaiwa J E;	Wildlife resource utilisation at Moremi Game Reserve and Khwai community area in the Okavango Delta, Botswana	2005	SHC	Study design	EXCLUDED
Mbaiwa Joseph E;	Changes on traditional livelihood activities and lifestyles caused by tourism development in the Okavango Delta, Botswana	2011	SHC	No outcome	EXCLUDED
Mbaiwa Joseph E; Stronza Amanda L;	The effects of tourism development on rural livelihoods in the Okavango Delta, Botswana	2010	SHC	Not forest	EXCLUDED
Mbile P ; Vabi M ; Meboka M ; Okon D ; Arrey-Mbo J ; Nkongho F ; Ebong E ;	Linking management and livelihood in environmental conservation: case of the Korup National Park Cameroon	2005	SHC	No outcome	EXCLUDED
Mbow C ; Smith P ; Skole D ; Duguma L ; Bustamante M ;	Achieving mitigation and adaptation to climate change through sustainable agroforestry practices in africa	2014	SHC	Review	EXCLUDED
Mbuvi D ; Boon E ;	The livelihood potential of non-wood forest products: The case of Mbooni Division in Makueni District, Kenya	2009	SHC	No outcome	EXCLUDED
McCall Michael K; Minang Peter a;	Assessing participatory GIS for community-based natural resource management: Claiming community forests in Cameroon	2005	SHC	Qualitative data	EXCLUDED
McDermott C L;	Certification and equity: Applying an "equity framework" to compare certification schemes across product sectors and scales	2013	SHC	Not discrete humans	EXCLUDED
Mcdermott M H;	Equity first or later? How US community-based forestry distributes benefits	2009	SHC	Study design	EXCLUDED
McDermott M H;	Locating benefits: Decision-spaces, resource access and equity in US community-based forestry	2009	SHC	Study design	EXCLUDED
McDermott M H; Schreckenberg K ;	Equity in community forestry: Insights from north and south	2009	SHC	Study design	EXCLUDED
McDougall Cynthia ; Banjade Mani Ram;	Social capital, conflict, and adaptive collaborative governance: exploring the dialectic	2015	SHC	No intervention	EXCLUDED
McElwee Pamela ;	Reforesting “Bare Hills” in Vietnam: Social and Environmental Consequences of the 5 Million Hectare Reforestation Program	2009	MCM	No comparisons	EXCLUDED
MCELWEE PAMELA D;	Forest environmental income in Vietnam: household socioeconomic factors influencing forest use	2008	MCM	No comparisons	EXCLUDED
McElwee Pamela D;	Resource use among rural agricultural households near protected areas in Vietnam: the social costs of conservation and implications for enforcement.	2010	MCM	No comparisons	EXCLUDED
MCGEE G T; HANEY H L; SIEGEL W C;	STATE INCOME-TAX IMPLICATIONS FOR NONINDUSTRIAL PRIVATE FORESTRY IN THE UNITED-STATES	1984	SHC	NO ACCESS	NO ACCESS
McGranahan D A;	Identifying ecological sustainability assessment factors for ecotourism and trophy hunting operations on private rangeland in Namibia	2010	MCM	Qualitative data	EXCLUDED
McPherson E G;	Urban forestry in North America	2006	SHC	Study design	EXCLUDED
McSweeney Kendra ;	Who Is “Forest-Dependent”? Capturing Local Variation in Forest-Product Sale, Eastern Honduras*	2002	SHC	Daily use	EXCLUDED
MCSWEENEY KENDRA ;	Forest Product Sale as Natural Insurance: The Effects of Household Characteristics and the Nature of Shock in Eastern Honduras	2004	SHC	No comparision	EXCLUDED
Meadows John ; Herbohn John ; Emtage Nick ;	Supporting Cooperative Forest Management among Small-Acreage Lifestyle Landowners in Southeast Queensland, Australia	2013	SHC	Not poor	EXCLUDED
Measham Thomas G; Lumbasi Jared a;	Success factors for community-based natural resource management (CBNRM): Lessons from Kenya and Australia	2013	SHC	Narrative case study	EXCLUDED
Meaton J ; Abebe B ; Wood AP ;	Forest Spice Development: the Use of Value Chain Analysis to Identify Opportunities for the Sustainable Development of Ethiopian Cardamom (Korerima)	2015	SHC	No outcome	EXCLUDED
Medina G ; Pokorny B ; Campbell B M;	Community forest management for timber extraction in the Amazon frontier	2009	SHC	No comparisons	EXCLUDED
Medina Gabriel ; Pokorny Benno ; Campbell Bruce ;	Loggers, Development Agents and the Exercise of Power in Amazonia	2009	SHC	No outcome	EXCLUDED
Medugu I N; Majid M R; Johar ; Taiwo I S	Assessing the impact of Forestry II program on agricultural productivity in the Arid Zone of Nigeria A case of Kano and Jigawa State	2014	SHC	NO ACCESS	NO ACCESS
Mehra D ;	Gender equity in forest management: case studies from Vidarbha region of Maharashtra state	2013	SHC	NO ACCESS	NO ACCESS
Meilby H ; Smith-Hall C ; Byg A ; Larsen HO ; Nielsen OJ ; Puri L ; Rayamajhi S ;	Are Forest Incomes Sustainable? Firewood and Timber Extraction and Productivity in Community Managed Forests in Nepal	2014	SHC	No comparision	EXCLUDED
Mejia E ; Pacheco P ; Muzo A ; Torres B ;	Smallholders and timber extraction in the Ecuadorian Amazon: amidst market opportunities and regulatory constraints	2015	SHC	No comparison	EXCLUDED
Meka E Z; Adetchessi L ;	Forestry in development	2002	SHC	CANNOT LOCATE	CANNOT LOCATE
Melick David ; Yang Xuefei ; Xu Jianchu ;	Seeing the wood for the trees: how conservation policies can place greater pressure on village forests in southwest China	2007	SHC	No outcome	EXCLUDED
Méndez V Ernesto; Bacon Christopher M; Olson Meryl ; Morris Katlyn S; Shattuck Annie ;	Agrobiodiversity and Shade Coffee Smallholder Livelihoods: A Review and Synthesis of Ten Years of Research in Central America*	2010	SHC	Study design	EXCLUDED
Mengist W ; Urgessa K ; Haile K ; Kebebew Z ;	Comparative study of forest under participatory forest management: A case of belete gera forest, southwest ethiopia	2013	MCM	Qualitative data	EXCLUDED
Mengistu T ; Teketay D ; Hulten H ; Yemshaw Y ;	The Role of Communities in Closed Area Management in Ethiopia	2005	SHC	Qualitative data	EXCLUDED
Mercado A R; Jr ; Patindol M ; Garrity D P;	The landcare experience in the Philippines: Technical and institutional innovations for conservation farming	2001	SHC	Narrative case study	EXCLUDED
Metcalfe S ; Kepe T ;	Dealing land in the midst of poverty: Commercial access to communal land in Zambia	2008	SHC	NO ACCESS	NO ACCESS
Miah M D; Chakma S ; Koike M ; Muhammed N ;	Contribution of forests to the livelihood of the Chakma community in the Chittagong Hill Tracts of Bangladesh	2012	SHC	No comparisons	EXCLUDED
Miah M G; Hussain M J;	Homestead Agroforestry: a Potential Resource in Bangladesh	2010	SHC	NO ACCESS	NO ACCESS
Miao G P; West R A;	Chinese collective forestlands: contributions and constraints	2004	SHC	Study design	EXCLUDED
Midmore D J; Nine~z V ; Venkataraman R ;	Household gardening projects in Asia: past experience and future directions	1991	SHC	Study design	EXCLUDED
Mikwamba K ; Masangano C ;	Mitigating HIV and AIDS impacts through agro-forestry practices	2013	SHC	Study design	EXCLUDED
Mikwamba K ; Mthinda C ;	The financial benefits of agroforestry practicing to HIV and AIDS affected households	2014	SHC	Study design	EXCLUDED
Ming'ate Felix Lamech Mogambi; Rennie Hamish G; Memon Ali ;	Potential for co-management approaches to strengthen livelihoods of forest dependent communities: A Kenyan case	2014	SHC	Qualitative data	EXCLUDED
Misra Dinesh ; Kant Shashi ;	Production analysis of collaborative forest management using an example of joint forest management from Gujarat, India	2004	MCM	Study design	EXCLUDED
Misra Dinesh ; Kant Shashi ;	Economic efficiency and shadow prices of social and biological outputs of village-level organizations of joint forest management in Gujarat, India	2005	MCM	No comparisons	EXCLUDED
Mitchell R E;	Environmental alternatives for Rural development: The case of Oaxaca, Mexico	2005	SHC	Narrative case study	EXCLUDED
Mitra A ; Mishra D K;	Environmental resource consumption pattern in rural Arunachal Pradesh	2011	SHC	No intervention	EXCLUDED
Mitschein T A; Miranda P S;	POEMA: A proposal for sustainable development in Amazonia	1998	SHC	Book	EXCLUDED
Mizaraite Diana ; Mizaras Stasys ; Sadauskiene Liana ;	Lithuanian Private Forestry: the Situation, Tendencies and Problems	2010	SHC	No outcome	EXCLUDED
Mohanty B ; Sahu G ;	An empirical study on elements of forest governance: A study of JFM implementation models in Odisha	2012	SHC	No outcome	EXCLUDED
Mokgolodi N C; Ding Y ; Setshogo M P; Ma C ; Liu Y ;	The importance of an indigenous tree to southern African communities with specific relevance to its domestication and commercialization: A case of the marula tree	2011	SHC	No intervention	EXCLUDED
Moktan MR ; Norbu L ; Choden K ;	Can community forestry contribute to household income and sustainable forestry practices in rural area? A case study from Tshapey and Zariphensum in Bhutan	2016	SHC	Study design	EXCLUDED
Molnar A ; Gomes D ; Sousa R ; Vidal N ; Hojer R F; Arguelles L A; Kaatz S ; Martin A ; Donini G ; Scherr S ; White A ; Kaimowitz D ;	Community forest enterprise markets in Mexico and Brazil: New opportunities and challenges for legal access to the forest	2008	SHC	Narrative case study	EXCLUDED
Montagne P ; Amadou O ;	Rural districts and community forest management and the fight against poverty in Niger: The household energy strategy - A forestry policy to supply urban areas with household energy	2012	SHC	Study design	EXCLUDED
Montagnini Florencia ; Finney Christopher ;	Payments for Environmental Services in Latin America as a Tool for Restoration and Rural Development	2011	SHC	No outcome	EXCLUDED
Montes-Rojas C ; Paz-Concha J P;	Useful agrobiodiversity in food and in traditional medicine in two municipalities of Cauca Agrobiodiversidad util en alimentacion y en medicina tradicional en dos municipios del Cauca	2015	SHC	Non-English	EXCLUDED
Moore H ; Vaughan M ;	Cutting down trees: women, nutrition and agricultural change in the northern province of Zambia, 1920-1986	1987	SHC	Study design	EXCLUDED
MORGAN-BROWN THERON ; JACOBSON SUSAN K; WALD KENNETH ; CHILD BRIAN ;	Quantitative Assessment of a Tanzanian Integrated Conservation and Development Project Involving Butterfly Farming	2010	SHC	No outcome	EXCLUDED
Morrison K ;	Community Perceptions of Forests, Conservation and Livelihoods in La Tigra National Park, Honduras	2013	MCM	THESIS	EXCLUDED
Moseley C ;	Procurement contracting in the affected counties of the Northwest Forest Plan: 12 years of change	2006	SHC	No outcome	EXCLUDED
Moss Stuart A; Hedderick Daniel B;	An Economic Evaluation of a Small-Scale Timber Harvesting Operation in Western Maryland, USA	2012	SHC	No comparisons	EXCLUDED
Motzke Iris ; Wanger Thomas C; Zanre Erin ; Tscharntke Teja ; Barkmann Jan ;	SOCIO-ECONOMIC CONTEXT OF FOREST BIODIVERSITY USE ALONG A TOWN-FOREST GRADIENT IN CAMBODIA	2012	SHC	No intervention	EXCLUDED
Muafor F J; Levang P ; Angwafo T E; Le Gall ; P ;	Making a living with forest insects: beetles as an income source in Southwest Cameroon	2012	SHC	No comparisons	EXCLUDED
Mudaca JD ; Tsuchiya T ; Yamada M ; Onwona-Agyeman S ;	Household participation in Payments for Ecosystem Services: A case study from Mozambique	2015	SHC	No outcome	EXCLUDED
Mugisha A R;	Evaluation of community-based conservation approaches management of protected areas in Uganda	2002	MCM	THESIS	EXCLUDED
Muhammed N ; Koike M ; Haque F ; Miah Md D;	Quantitative assessment of people-oriented forestry in Bangladesh: A case study in the Tangail forest division	2008	SHC	No comparisons	EXCLUDED
Muhammed Nur ; Koike Masao ; Sajjaduzzaman Md ; Sophanarith Kim ;	Reckoning social forestry in Bangladesh: Policy and plan versus implementation	2005	MCM	Not discrete humans	EXCLUDED
Muhweezi Alex B; Sikoyo George M; Chemonges Mathias ;	Introducing a Transboundary Ecosystem Management Approach in the Mount Elgon Region	2007	MCM	No comparision	EXCLUDED
Muhwezi O ; Cunningham A B; Bukenya-Ziraba R ;	Lianas and Livelihoods: The Role of Fibrous Forest Plants in Food Security and Society around Bwindi Impenetrable National Park, Uganda	2009		No comparision	EXCLUDED
Mujawamariya Gaudiose ; D'Haese Marijke ; Speelman Stijn ;	Exploring double side-selling in cooperatives, case study of four coffee cooperatives in Rwanda	2013	SHC	No outcome	EXCLUDED
Mukadasi Buyinza ; Kaboggoza J R; Nabalegwa M ;	Agroforestry practices in the buffer zone area of Mt Elgon National Park, eastern Uganda	2007	MCM	Attitudes towards intervention	EXCLUDED
Mukherjee P K; Tamang J P;	Special Issue: Indigenus knowledge of the ethnic people of Northeast India in bioresources management	2009	SHC	REVIEW	EXCLUDED
Mukul S A; Uddin M B; Manzoor Rashid ; A Z M; Fox J ;	Integrating livelihoods and conservation in protected areas: Understanding the role and stakeholder views on prospects for non-timber forest products, a Bangladesh case study	2010	SHC	No intervention	EXCLUDED
Mukul SA ; Herbohn J ; Rashid AZMM ; Uddin MB ;	Comparing the effectiveness of forest law enforcement and economic incentives to prevent illegal logging in Bangladesh	2014	SHC	No outcome	EXCLUDED
Mukul Sharif Ahmed; Rashid A Z. M. Manzoor; Uddin Mohammad Belal; Khan Niaz Ahmed;	Role of Non-timber Forest Products in Sustaining Forest-Based Livelihoods and Rural Households' Resilience Capacity in and around Protected Area: A Bangladesh Study	2016	SHC	No intervention	EXCLUDED
Mulenga B P; Richardson R B; Tembo G ; Mapemba L ;	Rural household participation in markets for non-timber forest products in Zambia	2013	SHC	No intervention	EXCLUDED
Mulugeta Lemenih ; Tarekegn Abebe ; Olsson M ;	Gum and resin resources from some Acacia, Boswellia and Commiphora species and their economic contributions in Liban, south-east Ethiopia	2003	SHC	No comparision	EXCLUDED
Mulyoutami Elok ; Rismawan Ratna ; Joshi Laxman ;	Local knowledge and management of simpukng (forest gardens) among the Dayak people in East Kalimantan, Indonesia	2009	JE	No comparisons	EXCLUDED
Munyanziza Esron ; Ngaga Yonika M;	Survey of edible mushrooms of the miombo woodlands through economic incentives in two villages of Tanzania	2006	SHC	NO ACCESS	NO ACCESS
Murali K S.a b; Jagannatha Rao ; R a ; Sudha P a; Sangeetha G a; Murthy I K.a; Ravindranath N H.a;	Evaluation studies of Joint Forest Management in India: Social and institutional implications	2003	SHC	REVIEW	EXCLUDED
Murdiyarso Daniel ; van Noordwijk ; Meine ; Puntodewo Atie ; Widayati Atiek ; Lusiana Betha ;	District-scale prioritization for A/R CDM project activities in Indonesia in line with sustainable development objectives	2008	SHC	Study design	EXCLUDED
Murillo Sergio A Molina; Castillo Juan Pablo Perez; Ugalde Maria Elena Herrera;	Assessment of environmental payments on indigenous territories: The case of Cabecar-Talamanca, Costa Rica	2014	SHC	No comparisons	EXCLUDED
Murniati ; Garrity D P; Gintings A N;	The contribution of agroforestry systems to reducing farmers' dependence on the resources of adjacent national parks: a case study from Sumatra, Indonesia	2001	SHC	No comparisons	EXCLUDED
Musavi Azra ;	Dependence of Local Communities on Forest Resources: Implications for Protected Area Management in Melghat Tiger Reserve, Maharashtra, India	2015	SHC	NO ACCESS	NO ACCESS
Mustalahti I ; Nathan I ;	Constructing and sustaining participatory forest management: Lessons from Tanzania, Mozambique, Laos and Vietnam	2009	MCM	Qualitative data	EXCLUDED
Mustalahti I ; Rakotonarivo OS ;	REDD plus and Empowered Deliberative Democracy: Learning from Tanzania	2014	SHC	No comparision	EXCLUDED
Mustalahti Irmeli ;	Sustaining Participatory Forest Management: Case Study Analyses of Forestry Assistance from Tanzania, Mozambique, Laos and Vietnam	2009	SHC	Narrative case study	EXCLUDED
MUSTALAHTI IRMELI ;	How To Handle the Stick: Positive Processes and Crucial Barriers of Participatory Forest Management	2006	SHC	Narrative case study	EXCLUDED
Mustalahti Irmeli ; Lund Jens Friis;	Where and How Can Participatory Forest Management Succeed? Learning From Tanzania, Mozambique, and Laos	2010	SHC	Narrative case study	EXCLUDED
Mustalahti Irmeli ; Tassa Dominic Taku;	Analysis of three crucial elements of REDD plus in participatory forest management	2012	SHC	Qualitative data	EXCLUDED
Musyoki Josephine Kamene; Mugwe Jayne ; Mutundu Kennedy ; Muchiri Mbae ;	Factors influencing level of participation of community forest associations in management forests in Kenya	2016	SHC	No outcome	EXCLUDED
Mutandwa E ; Kanyarukiga R ;	Understanding the role of forests in rural household economies: experiences from the Northern and Western provinces of Rwanda	2016	SHC	No comparisons	EXCLUDED
Mutandwa Edward ; Gadzirayi Christopher Tafara;	Impact of community-based approaches to wildlife management: case study of the CAMPFIRE programme in Zimbabwe	2007	SHC	No comparisons	EXCLUDED
Mutenje M J; Ortmann G F; Ferrer S R. D;	Extraction of non-timber forest products as a coping strategy for HIV/AIDS - afflicted rural households in south-eastern Zimbabwe	2011	SHC	No intervention	EXCLUDED
Mutenje M J; Ortmann G F; Ferrer S R. D; Darroch M A. G;	Rural livelihood diversity to manage economic shocks: Evidence from south-east Zimbabwe	2010	SHC	No intervention	EXCLUDED
Mvondo S A;	Decentralized forest resources and access of minorities to environmental justice: an analysis of the case of the Baka in southern Cameroon		MCM	Qualitative data	EXCLUDED
Mvondo Samuel Assembe;	Forestry income management and poverty reduction: empirical findings from Kongo, Cameroon	2006	MCM	Not discrete humans	EXCLUDED
Mwanukuzi Phillip K;	Impact of eucalyptus and pine growing on rural livelihood: the lesson from Bukoba area, north western Tanzania	2009	SHC	Study design	EXCLUDED
Mythili G ; Shylajan C S;	An analysis of community dependence and forest management	2009	SHC	NO ACCESS	NO ACCESS
Nagendra H ; Gokhale Y ;	Management regimes, property rights, and forest biodiversity in Nepal and India	2008	MCM	No comparisons	EXCLUDED
Nagendra Harini ;	Tenure and forest conditions: community forestry in the Nepal Terai	2002	SHC	No outcome	EXCLUDED
Nagendra Harini ; Rocchini Duccio ; Ghate Rucha ;	Beyond parks as monoliths: Spatially differentiating park-people relationships in the Tadoba Andhari Tiger Reserve in India	2010	SHC	No comparison	EXCLUDED
Naidoo Robin ; Weaver L Chris; De Longcamp ; Marie ; Du Plessis ; Pierre ;	Namibia's community-based natural resource management programme: an unrecognized payments for ecosystem services scheme	2011	SHC	REVIEW	EXCLUDED
Naidoo Robin ; Weaver L Chris; Stuart-Hill Greg ; Tagg Jo ;	Effect of biodiversity on economic benefits from communal lands in Namibia	2011	SHC	No intervention	EXCLUDED
Naik Jogindra ;	Implementation of Forest Rights Act 2006 in Odisha	2013	SHC	Methods unclear	EXCLUDED
Nair P K Ramachandran;	The coming of age of agroforestry	2007	SHC	Study design	EXCLUDED
Nalvarte J ;	How to restore dry forest ecosystems	2012	SHC	No outcome	EXCLUDED
Nambiar EKS ;	Forestry for rural development, poverty reduction and climate change mitigation: we can help more with wood	2015	SHC	NO ACCESS	NO ACCESS
Narain U ; Gupta S ; Veld K V;	Poverty and the environment: exploring the relationship between household incomes, private assets, and natural assets	2008	SHC	No intervention	EXCLUDED
Narayanan M K. R; Kumar N A;	Gendered knowledge and changing trends in utilization of wild edible greens in Western Ghats, India	2007	SHC	No outcome, no comparisons	EXCLUDED
Nasi R ; Taber A ; Van Vliet ; N ;	Empty forests, empty stomachs? Bushmeat and livelihoods in the Congo and Amazon Basins	2011	SHC	REVIEW	EXCLUDED
Nath T K;	PARTICIPATORY FORESTRY PROGRAM IN THE CHITTAGONG HILL TRACTS REGION	2009	SHC	CANNOT LOCATE	CANNOT LOCATE
Nath T K;	LINKAGES BETWEEN LIVELIHOODS OF FOREST VILLAGERS AND FOREST CONSERVATION IN SYLHET REGION	2009	SHC	CANNOT LOCATE	CANNOT LOCATE
Nath T K;	PARTICIPATORY FOREST MANAGEMENT AND LIVELIHOODS OF ETHNIC PEOPLE: EMPIRICAL ANALYSIS FROM BANGLADESH CONCLUSION	2009	SHC	NO ACCESS	NO ACCESS
Nath T K; Inoue M ;	Why did the project fail to achieve its objectives in some villages? The experience of the Upland Settlement Project (USP) in Bangladesh	2008	SHC	No comparisons	EXCLUDED
Nath T K; Inoue M ;	Sustainability attributes of a small-scale betel leaf agroforestry system: A case study in north-eastern hill forests of Bangladesh	2009	SHC	No comparisons	EXCLUDED
Nath T K; Inoue M ;	Forest Villagers in Northeastern Hill Forests of Bangladesh: Examining Their Livelihoods, Livelihood Strategies and Forest Conservation Linkages	2013	SHC	No intervention	EXCLUDED
Nath T K; Inoue M ; De Zoysa ; M ;	Small-Scale Rubber Planting for Enhancement of People's Livelihoods: A Comparative Study in Three South Asian Countries	2013	SHC	No comparisons	EXCLUDED
Nath T K; Inoue M ; Myant H ;	SMALL-SCALE AGROFORESTRY IN THE UPLANDS OF BANGLADESH: A CASE STUDY	2009	SHC	No comparisons	EXCLUDED
Nath T K; Makoto I ; Islam M J; Kabir M A;	The Khasia tribe of Northeastern Bangladesh: Their socio-economic status, hill farming practices and impacts on forest conservation	2003	SHC	No outcome	EXCLUDED
Nath T K.a c; Inoue M b; Myant H a;	Small-scale agroforestry for upland community development: A case study from Chittagong Hill Tracts, Bangladesh	2005	MCM	No comparison	EXCLUDED
Nath Tapan Kumar; Inoue Makoto ;	Impacts of Participatory Forestry on Livelihoods of Ethnic People: Experience from Bangladesh	2010	SHC	No comparisons	EXCLUDED
Nath TK ; Jashimuddin M ; Hasan MK ; Shahjahan M ; Pretty J ;	The sustainable intensification of agroforestry in shifting cultivation areas of Bangladesh	2016	SHC	No comparisons	EXCLUDED
Naughton-Treves Lisa ;	Farming the forest egde: vulnerable places and people around Kibale National Park, Uganda	1997	MCM	No intervention	EXCLUDED
Nault Sebastien ; Stapleton Paul ;	The community participation process in ecotourism development: a case study of the community of Sogoog, Bayan-Ulgii, Mongolia	2011	SHC	NO ACCESS	NO ACCESS
Nautiyal S ; Maikhuri R K; Rao K S; Saxena K G;	Medicinal plant resources in Nanda Devi Biosphere reserve in the central Himalayas	2001	SHC	NO ACCESS	NO ACCESS
Nautiyal S ; Rajan K S; Shibasaki R ;	Interaction of Biodiversity and Economic Welfare - A Case Study from the Himalayas of India	2005	SHC	No intervention	EXCLUDED
Nawir A A; Santoso L ;	Mutually beneficial company-community partnerships in plantation development: emerging lessons from Indonesia	2005	SHC	No outcome	EXCLUDED
Nayak S ;	Community mobilization for conservation and cultivation of medicinal plants: a case study in Keonjhar District, Orissa, India	2005	SHC	NO ACCESS	NO ACCESS
Ndoye O ;	The importance of sustainable land management for food security and healthy human nutrition in Central Africa	2016	SHC	CANNOT LOCATE	CANNOT LOCATE
Ndoye O ; Ze A A;	The contribution of Non Wood Forest Products to the Millennium Development Goals: evidence from Central Africa	2015	SHC	No comparision	EXCLUDED
Ndoye Ousseynou ; Tieguhong Julius Chupezi;	Forest Resources and Rural Livelihoods: The Conflict Between Timber and Non-timber Forest Products in the Congo Basin	2004	SHC	No comparisons	EXCLUDED
Neba Ndenecho Emmanuel;	Population dynamics, rural livelihoods and forest protection projects in Sub-Saharan Africa: experiences from Santa, Cameroon	2007	MCM	Willingness to participate/awareness of intervention	EXCLUDED
Nebel G ; Quevedo L ; Jacobsen J B; Helles F ;	Development and economic significance of forest certification: the case of FSC in Bolivia	2005	SHC	No outcome	EXCLUDED
Neef Andreas ; Onchan Tongroj ; Schwarzmeier Rainer ;	Access to natural resources in Mainland Southeast Asia and implications for sustaining rural livelihoods - The case of Thailand	2003	MCM	Qualitative data	EXCLUDED
Negash Almaz ; Niehof Anke ;	The significance of enset culture and biodiversity for rural household food and livelihood security in southwestern Ethiopia	2004	SHC	Study topic	EXCLUDED
NELSON FRED ; FOLEY CHARLES ; FOLEY LARA S; LEPOSO ABRAHAM ; LOURE EDWARD ; PETERSON DAVID ; PETERSON MIKE ; PETERSON THAD ; SACHEDINA HASSAN ; WILLIAMS ANDREW ;	Payments for Ecosystem Services as a Framework for Community-Based Conservation in Northern Tanzania	2010	SHC	No outcome	EXCLUDED
Nelson V ; Tallontire A ; Collinson C ;	Assessing the benefits of ethical trade schemes for forest dependent people: Comparative experience from Peru and Ecuador	2002	SHC	Narrative case study	EXCLUDED
Nepstad Daniel ; Irawan Silvia ; Bezerra Tathiana ; Boyd William ; Stickler Claudia ; Shimada Joao ; Carvalho Jr ; Oswaldo ; MacIntyre Katie ; Dohong Alue ; Alencar Ane ; Azevedo Andrea ; Tepper David ; Lowery Sarah ;	More food, more forests, fewer emissions, better livelihoods: linking REDD plus , sustainable supply chains and domestic policy in Brazil, Indonesia and Colombia	2013	SHC	Study design	EXCLUDED
Nepstad Daniel C; Boyd William ; Stickler Claudia M; Bezerra Tathiana ; Azevedo Andrea A;	Responding to climate change and the global land crisis: REDD+, market transformation and low-emissions rural development.	2013	SHC	Not discrete humans	EXCLUDED
Neupane Ramji P; Sharma Khem R; Thapa Gopal B;	Adoption of agroforestry in the hills of Nepal: A logistic regression analysis	2002	MCM	Adoption of methods	EXCLUDED
Newton P ; Oldekop JA ; Brodnig G ; Karna BK ; Agrawal A ;	Carbon, biodiversity, and livelihoods in forest commons: synergies, trade-offs, and implications for REDD	2016	SHC	No comparisons	EXCLUDED
Newton P ; Schaap B ; Fournier M ; Cornwall M ; Rosenbach DW ; DeBoer J ; Whittemore J ; Stock R ; Yoders M ; Brodnig G ; Agrawal A ;	Community forest management and REDD	2015	SHC	No comparision	EXCLUDED
Newton Peter ; Agrawal Arun ; Wollenberg Lini ;	Enhancing the sustainability of commodity supply chains in tropical forest and agricultural landscapes	2013	SHC	REVIEW	EXCLUDED
Newton Peter ; Endo Whaldener ; Peres Carlos a;	Determinants of livelihood strategy variation in two extractive reserves in Amazonian flooded and unflooded forests	2012	MCM	No comparison	EXCLUDED
Newton Peter ; Nichols Elizabeth S; Endo Whaldener ; Peres Carlos a;	Consequences of actor level livelihood heterogeneity for additionality in a tropical forest payment for environmental services programme with an undifferentiated reward structure	2012	SHC	No comparison	EXCLUDED
Ngugi R K; Nyariki D M;	Rural livelihoods in the arid and semi-arid environments of Kenya: Sustainable alternatives and challenges	2005	SHC	No outcome	EXCLUDED
Nguiffo SAMUEL ;	One forest and two dreams: The constraints imposed on the Baka in Miatta by the Dja Wildlife Reserve	2003	SHC	Narrative case study	EXCLUDED
Nguyen Thi ; Yen ; Nguyen Quang ; Duc ; Vu Manh ; Thien ; Dang Duc ; Phuong ; Ogle B A;	Dependency on forest and tree products for food security: a pilot study in Yen Huong commune, Ham Yen district, Tuyen Quang province, North Vietnam	1994	SHC	CANNOT LOCATE	CANNOT LOCATE
Nguyen Thuy Ngoc;	Role of social capital in natural resource conservation: a case study of Cat Tien National Park in Vietnam	2007	SHC	THESIS	EXCLUDED
Nguyen TTP ; Masuda M ; Iwanaga S ;	The effect of forestland allocation to the livelihoods of local people in the North Central Coast of Vietnam: A case in Nam Dong district	2016	SHC	NO ACCESS	NO ACCESS
Nielsen Martin Reinhardt; Treue Thorsten ;	Hunting for the Benefits of Joint Forest Management in the Eastern Afromontane Biodiversity Hotspot: Effects on Bushmeat Hunters and Wildlife in the Udzungwa Mountains	2012	SHC	No outcome	EXCLUDED
Nielsen-Pincus Max ; Moseley Cassandra ;	The Economic and Employment Impacts of Forest and Watershed Restoration	2013	SHC	Not poor	EXCLUDED
Nieratka LR ; Bray DB ; Mozumder P ;	Can Payments for Environmental Services Strengthen Social Capital, Encourage Distributional Equity, and Reduce Poverty	2015	SHC	No comparision	EXCLUDED
Nightingale Andrea ; Sharma Jeevan Raj;	Conflict resilience among community forestry user groups: experiences in Nepal	2014	SHC	Qualitative data	EXCLUDED
Nikolakis W ; Nelson H ;	To log or not to log? How forestry fits with the goals of First Nations in British Columbia	2015	SHC	Qualitative data	EXCLUDED
Ninan K N;	Non Timber Forest Products and Biodiversity Conservation: a Study of Tribals in a Protected Area in India	2012	SHC	No intervention	EXCLUDED
Ninan K N; Sathyapalan J ;	The economics of biodiversity conservation: A study of a coffee growing region in the Western Ghats of India	2005	SHC	Willingness to participate/awareness of intervention	EXCLUDED
Ninez V ;	Household gardens: theoretical and policy considerations	1987	SHC	Study design	EXCLUDED
Njana M A; Kajembe G C; Malimbwi R E;	Are miombo woodlands vital to livelihoods of rural households? Evidence from Urumwa and surrounding communities, Tabora, Tanzania	2013	SHC	No comparison	EXCLUDED
Njenga M ; Karanja N ; Munster C ; Iiyama M ; Neufeldt H ; Kithinji J ; Jamnadass R ;	Charcoal production and strategies to enhance its sustainability in Kenya	2013	SHC	NO ACCESS	NO ACCESS
Nkem J N; Somorin O A; Jum C ; Idinoba M E; Bele Y M; Sonwa D J;	Profiling climate change vulnerability of forest indigenous communities in the Congo Basin	2013	SHC	Subsistence	EXCLUDED
Novellino Dario ; Dressler W H;	The role of 'hybrid' NGOs in the conservation and development of Palawan Island, the Philippines	2010	MCM	Qualitative data	EXCLUDED
Nuesiri EO ;	Local government authority and representation in REDD plus : a case study from Nigeria	2016	SHC	Qualitative data	EXCLUDED
Nzunda Emmanuel F; Mahuve Tumaini G;	A Swot Analysis of Mitigation of Climate Change Through REDD	2011	SHC	Study design	EXCLUDED
Oberlack C ; Walter PL ; Schmerbeck J ; Tiwari BK ;	Institutions for sustainable forest governance: Robustness, equity, and cross-level interactions in Mawlyngbna, Meghalaya, India	2015	SHC	No comparison	EXCLUDED
Ocampo-Thomason P ;	Mangroves, people and cockles: Impacts of the shrimp-farming industry on mangrove communities in Esmeraldas Province, Ecuador	2006	SHC	No comparison	EXCLUDED
Ochoa WS ; Paul C ; Castro LM ; Valle L ; Knoke T ;	BANNING GOATS COULD EXACERBATE DEFORESTATION OF THE ECUADORIAN DRY FOREST - HOW THE EFFECTIVENESS OF CONSERVATION PAYMENTS IS INFLUENCED BY PRODUCTIVE USE OPTIONS	2016	SHC	Modeling	EXCLUDED
Odhiambo M O; Grauel B ; Rice D ; Jiggins J ; Mwangi W ; Taylor G ; Johansson L ; Sikar T ole; Hansson B ; Westman P ; Sernbo K ; Kloth J H;	Special issue on diversity	1996	SHC	CANNOT LOCATE	CANNOT LOCATE
Ogada M J;	Forest Management Decentralization in Kenya: Effects on Household Farm Forestry Decisions in Kakamega	2012	MCM	No outcome	EXCLUDED
Ohl-Schacherer Julia ; Mannigel Elke ; Kirkby Chris ; Shepard Jr ; Glenn H ; Yu Douglas W;	Indigenous ecotourism in the Amazon: A case study of `Casa matsiguenka' in Manu National Park, Peru	2008	SHC	No outcome	EXCLUDED
Ojha Hemant ; Cameron John ; Bhattarai Basundhara ;	Understanding development through the language of Habermas and Bourdieu - Insights from Nepal's Leasehold Forestry Programme	2005	SHC	Narrative case study	EXCLUDED
Oli BN ; Treue T ;	Determinants of participation in Community Forestry in Nepal	2015	SHC	No outcome	EXCLUDED
Oli BN ; Treue T ; Larsen HO ;	Socio-economic determinants of growing trees on farms in the middle hills of Nepal	2015	SHC	No outcome	EXCLUDED
Oli BN ; Treue T ; Smith-Hall C ;	The relative importance of community forests, government forests, and private forests for household-level incomes in the Middle Hills of Nepal	2016	SHC	No intervention	EXCLUDED
Olsen C S;	The trade in medicinal and aromatic plants from central Nepal to northern India	1998	SHC	No comparison	EXCLUDED
Olsen C S; Larsen H O;	Alpine medicinal plant trade and Himalayan mountain livelihood strategies	2003	SHC	No intervention	EXCLUDED
Olsen C S; Treue T ;	Analysis of trade in non-timber forest products	2003	SHC	No outcome	EXCLUDED
Ongugo Paul O; Mogoi J N; Obonyo E ; Oeba V O;	Examining the roles of community forest associations (CFAs) in the decentralization process of Kenyan forests	2008	SHC	Study topic	EXCLUDED
Oo T N; Park Y D; Woo S Y; Phonguodume C ; Lee Y K;	Contributions of community forestry to the rural livelihoods and watershed conservation: A case study in Ywangan township, Shan state, Myanmar	2012	SHC	No comparison	EXCLUDED
Orchard SE ; Stringer LC ; Quinn CH ;	Impacts of aquaculture on social networks in the mangrove systems of northern Vietnam	2015	SHC	No intervention	EXCLUDED
Ormsby Alison ;	Analysis of local attitudes toward the sacred groves of Meghalaya and Karnataka, India	2013	SHC	Qualitative data	EXCLUDED
Ormsby Alison ; Mannle Kathryn ;	Ecotourism Benefits and the Role of Local Guides at Masoala National Park, Madagascar	2006	MCM	No comparisons	EXCLUDED
Osborne T ;	Tradeoffs in carbon commodification: A political ecology of common property forest governance	2015	SHC	Narrative case study	EXCLUDED
Osborne Tracey Muttoo;	Carbon forestry and agrarian change: access and land control in a Mexican rainforest	2011	SHC	Narrative case study	eXCLUDED
Ostwald Madelene ; Baral Ranjan ;	Local Forest Protection, Gender and Caste—Dhani Hill, Orissa, India	2000	MCM	No outcomes	EXCLUDED
Ota M ; Masuda M ; Tani Y ;	The Institutional Design and Effectiveness of Timber Benefit Sharing under Joint Forest Management in Madhya Pradesh, India	2013	SHC	No outcome	EXCLUDED
Otsuka K ; Suyanto S ; Sonobe T ; Tomich T P;	Evolution of land tenure institutions and development of agroforestry: evidence from customary land areas of Sumatra	2001	SHC	No outcome	EXCLUDED
Otto J ; Zerner C ; Robinson J ; Donovan R ; Lavelle M ; Villarreal R ; Salafsky N ; Alcorn J ; Seymour F ; Kleyneyer C ;	Natural connections: perspectives in community-based conservation	2013	SHC	Book	EXCLUDED
Ovando P ; Oviedo JL ; Campos P ;	Measuring total social income of a stone pine afforestation in Huelva (Spain)	2016	SHC	Modeling	EXCLUDED
Ovando Paola ; Campos Pablo ; Oviedo Jose L; Montero Gregorio ;	Private Net Benefits from Afforesting Marginal Cropland and Shrubland with Cork Oaks in Spain	2010	SHC	NO ACCESS	NO ACCESS
OVERDEVEST C ; GREEN G P;	FOREST DEPENDENCE AND COMMUNITY WELL-BEING - A SEGMENTED MARKET APPROACH	1995	SHC	Dependence	EXCLUDED
Owino F ;	Comments to "Building linkages between poverty reduction strategy and national forest programme: the case of Mozambique" by Cuco et al	2003	SHC	CANNOT LOCATE	CANNOT LOCATE
Oyono P R; Kouna C ; Mala W ;	Benefits of forests in Cameroon. Global structure, issues involving access and decision-making hiccoughs	2005	SHC	Methods unclear	EXCLUDED
Pacheco Liliana ; Fraixedas Sara ; Fernández-Llamazares Álvaro ; Estela Neus ; Mominee Robert ; Guallar Ferran ;	Perspectives on Sustainable Resource Conservation in Community Nature Reserves: A Case Study from Senegal	2012	MCM	Qualitative data	EXCLUDED
Pacheco Pablo ; de Jong ; Wil ; Johnson James ;	The evolution of the timber sector in lowland Bolivia: Examining the influence of three disparate policy approaches	2010	SHC	No outcome	EXCLUDED
Padmanaba Michael ; Sheil Douglas ;	Finding and promoting a local conservation consensus in a globally important tropical forest landscape	2007	SHC	No outcome	EXCLUDED
Padoch C ; Sunderland T ;	International Conference on Forests for Food Security and Nutrition, Rome, Italy, 13-15 May 2013	2013	SHC	Study topic	EXCLUDED
Pagiola Stefano ; Arcenas Agustin L; Platais Gunars ; Pagiola Stefano ; Arcenas Agustin ; Platais Gunars ;	Can Payments for Environmental Services Help Reduce Poverty? An Exploration of the Issues and the Evidence to Date from Latin America	2005	SHC	REVIEW	EXCLUDED
Panda S M;	Towards a sustainable natural resource management of tribal communities: Findings from a study of swidden and wetland cultivation in remote hill regions of eastern India	1999	SHC	No outcome	EXCLUDED
Pandey A K;	SUSTAINABLE MANAGEMENT OF NON TIMBER FOREST PRODUCTS (NTFPS) FOR RURAL DEVELOPMENT AND POVERTY ALLEVIATION	2009	SHC	CANNOT LOCATE	CANNOT LOCATE
Pandey R ;	Forestry's contribution to livestock feed in Uttarakhand, India: A quantitative assessment of volume and economic value	2011	SHC	Study design	EXCLUDED
Pandey Shiva Shankar; Cockfield Geoff ; Maraseni Tek Narayan;	Assessing the roles of community forestry in climate change mitigation and adaptation: A case study from Nepal	2016	SHC	Qualitative data	EXCLUDED
Pandey T N; Struik P C;	Forage production from degraded forest and pasture land under protected and grazed conditions in Nepal	1998	SHC	No outcome	EXCLUDED
Pandit B H; Thapa G B;	Poverty and resource degradation under different common forest resource management systems in the mountains of Nepal	2004	SHC	No outcome	EXCLUDED
Pandit Bishnu ; Albano Adrian ; Kumar Chetan ;	Community-Based Forest Enterprises in Nepal: An Analysis of Their Role in Increasing Income Benefits to the Poor	2009	MCM	No comparisons	EXCLUDED
Pandit Bishnu Hari; Thapa Gopal B;	A tragedy of non-timber forest resources in the mountain commons of Nepal	2003	MCM	No outcomes	EXCLUDED
Parajuli R ; Lamichhane D ; Joshi O ;	Does Nepal's community forestry program improve the rural household economy? A cost-benefit analysis of community forestry user groups in Kaski and Syangja districts of Nepal	2015	SHC	No outcome	EXCLUDED
Paré S ; Savadogo P ; Tigabu M ; Ouadba J M; Odén P C;	Consumptive values and local perception of dry forest decline in Burkina Faso, West Africa	2010	SHC	No outcome	EXCLUDED
Parker P ; Thapa B ; Jacob A ;	Decentralizing conservation and diversifying livelihoods within Kanchenjunga Conservation Area, Nepal	2015	SHC	No comparisons	EXCLUDED
Parker Pete ; Thapa Brijesh ;	Natural Resource Dependency and Decentralized Conservation Within Kanchenjunga Conservation Area Project, Nepal	2012	SHC	Subsistence	EXCLUDED
Parker Pete ; Thapa Brijesh ;	Distribution of benefits based on household participation roles in decentralized conservation within Kanchenjunga Conservation Area Project, Nepal	2011	SHC	No outcome	EXCLUDED
Parkins J R; Stedman R C; Beckley T M;	Forest sector dependence and community well-being: A structural equation model for New Brunswick and British Columbia	2003	SHC	Study design	EXCLUDED
Pasicolan P N; deHaes H A U; Sajise P E;	Farm forestry: an alternative to government-driven reforestation in the Philippines	1997	SHC	No comparision	EXCLUDED
Patenaude G ; Lewis K ;	The Impacts of Tanzania's Natural Resource Management Programmes for Ecosystem Services and Poverty Alleviation	2014	MCM	Review	EXCLUDED
Pattnaik B K; Dutta S ;	JFM in south-west Bengal - A study in participatory development	1997	SHC	No comparisons	EXCLUDED
Paudel D ;	In Search of Alternatives: Pro-Poor Entrepreneurship in Community Forestry	2012	SHC	Study design	EXCLUDED
Paudel Naya Sharma; Monterroso Iliana ; Cronkleton Peter ;	Secondary Level Organisations and the Democratisation of Forest Governance: Case Studies from Nepal and Guatemala	2012	SHC	Narrative case study	EXCLUDED
Paudyal K ; Baral H ; Burkhard B ; Bhandari SP ; Keenan RJ ;	Participatory assessment and mapping of ecosystem services in a data-poor region: Case study of community-managed forests in central Nepal	2015	SHC	No outcome	EXCLUDED
Paul C ; Griess VC ; Havardi-Burger N ; Weber M ;	Timber-based agrisilviculture improves financial viability of hardwood plantations: a case study from Panama	2015	SHC	No comparisons	EXCLUDED
Paumgarten F ; Shackleton C M;	Wealth differentiation in household use and trade in non-timber forest products in South Africa	2009	SHC	No intervention	EXCLUDED
Paumgarten F ; Shackleton C M;	The role of non-timber forest products in household coping strategies in South Africa: the influence of household wealth and gender	2011	SHC	No intervention	EXCLUDED
Pelletier J ; Gelinas N ; Skutsch M ;	The Place of Community Forest Management in the REDD plus Landscape	2016	SHC	Study design	EXCLUDED
Peluso N L;	THE IRONWOOD PROBLEM - (MIS)MANAGEMENT AND DEVELOPMENT OF AN EXTRACTIVE RAIN-FOREST PRODUCT	1992	SHC	Narrative case study	EXCLUDED
Pemunta Ngambouk Vitalis;	The governance of nature as development and the erasure of the Pygmies of Cameroon	2013	MCM	No comparisons	EXCLUDED
Peras RJJ ; Pulhin JM ; Inoue M ;	Local stakeholders' assessment of community-based forest management and the implications for REDD Plus implementation in the Philippines	2015	SHC	NO ACCESS	NO ACCESS
Pereira Simone Novotny Couto;	Payment for Environmental Services in the Amazon Forest: How Can Conservation and Development Be Reconciled?	2010	SHC	Narrative case study	EXCLUDED
Perry-Fingal B ;	A case study of community-based tourism within the Morne Trois Pitons world heritage site, Dominica	2009	MCM	Qualitative data	EXCLUDED
Persha L ; Blomley T ;	Management decentralization and montane forest conditions in Tanzania	2009	SHC	Environmental outcome	EXCLUDED
Persha Lauren ; Fischer Harry ; Chhatre Ashwini ; Agrawal Arun ; Benson Catherine ;	Biodiversity conservation and livelihoods in human-dominated landscapes: Forest commons in South Asia	2010	MCM	No comparison	EXCLUDED
Perz S G; Rosero M ; Leite F L; Carvalho L A; Castillo J ; Mejia C V;	Regional Integration and Household Resilience: Infrastructure Connectivity and Livelihood Diversity in the Southwestern Amazon	2013	SHC	No comparisons	EXCLUDED
Petursson J G; Vedeld P ; Kaboggoza J ;	Transboundary biodiversity management: Institutions, local stakeholders, and protected areas: A case study from Mt. Elgon, Uganda And Kenya	2011	SHC	Study design	EXCLUDED
Pfaff a ; Robalino J ; Herrera L D;	Decentralization given environment-development tradeoffs: Federal versus state conservation and impacts on Amazon deforestation	2011	SHC	NO ACCESS	NO ACCESS
Pfaff Alexander ; Kerr Suzi ; Lipper Leslie ; Cavatassi Romina ; Davis Benjamin ; Hendy Joanna ; Sanchez-Azofeifa G Arturo;	Will buying tropical forest carbon benefit the poor? Evidence from Costa Rica	2007	SHC	Potential outcomes	EXCLUDED
Pfaff Alexander ; Robalino Juan ; Sanchez-Azofeifa G Arturo; S Andam ; Kwaw ; J Ferraro ; Paul ;	Park Location Affects Forest Protection: Land Characteristics Cause Differences in Park Impacts across Costa Rica	2009	SHC	No outcome	EXCLUDED
Pfund J L; Koponen P ; O'Connor T ; Boffa J M; van Noordwijk ; M ; Sorg J P;	Biodiversity Conservation and Sustainable Livelihoods in Tropical Forest Landscapes	2008	SHC	REVIEW	EXCLUDED
Pham TT ; Castella JC ; Lestrelin G ; Mertz O ; Le DN ; Moeliono M ; Nguyen TQ ; Vu HT ; Nguyen TD ;	Adapting Free, Prior, and Informed Consent (FPIC) to Local Contexts in REDD+: Lessons from Three Experiments in Vietnam	2015	SHC	No comparision	EXCLUDED
Pham TT ; Mai YH ; Moeliono M ; Brockhaus M ;	Women's participation in REDD plus national decision-making in Vietnam	2016	SHC	Qualitative data	EXCLUDED
Phamtrong N ; Swan S ;	An investigation into the drivers of forest encroachment in Bidoup Nui Ba National Park, Vietnam	2009	SHC	No comparision	EXCLUDED
Philpott Stacy M; Bichier Peter ; Rice Robert A; Greenberg Russell ;	Biodiversity conservation, yield, and alternative products in coffee agroecosystems in Sumatra, Indonesia	2008	SHC	No comparision	EXCLUDED
Phuc To Xuan;	Why did the forest conservation policy fail in the Vietnamese uplands? Forest conflicts in Ba Vi National Park in Northern Region	2009	SHC	Qualitative data	EXCLUDED
Piketty MG ; Drigo I ; Sablayrolles P ; de Aquino EA ; Pena D ; Sist P ;	Annual Cash Income from Community Forest Management in the Brazilian Amazon: Challenges for the Future	2015	SHC	No comparisons	EXCLUDED
Pimentel D ; McNair M ; Duck L ; Pimentel M ; Kamil J ;	The value of forests to world food security	1997	SHC	REVIEW	EXCLUDED
Pineda-Lopez MD ; Sanchez-Velasquez LR ; Ventura YP ; Fernandez PG ; Binnquist CL ; Rojo-Alboreca A ;	The Role of Women in the Forest Conservation in a Mexican National Park: Pruning Firs for the Manufacture of Christmas Wreaths	2015	SHC	No outcome	EXCLUDED
Pinkerton E W; Benner J ;	Small Sawmills Persevere While the Majors Close: Evaluating Resilience and Desirable Timber Allocation in British Columbia, Canada	2013	SHC	No outcome	EXCLUDED
Plumb S T; Nielsen E A; Kim Y S;	Challenges of opportunity cost analysis in planning REDD+: A honduran case study of social and cultural values associated with indigenous forest uses	2012	SHC	No comparisons	EXCLUDED
Poffenberger M ;	People in the forest: Community forestry experiences from Southeast Asia	2006	SHC	NO ACCESS	NO ACCESS
Pohle P ; Gerique A ; Park M ; Sandoval M F. L;	Human ecological dimensions in sustainable utilization and conservation of tropical mountain rain forests under global change in southern Ecuador	2010	SHC	Book	EXCLUDED
Pokorny B ; Pacheco P ;	Money from and for forests: A critical reflection on the feasibility of market approaches for the conservation of Amazonian forests	2014	SHC	Not discrete humans	EXCLUDED
Pokorny Benno ; Scholz Imme ; de Jong ; Wil ;	REDD plus for the poor or the poor for REDD plus ? About the limitations of environmental policies in the Amazon and the potential of achieving environmental goals through pro-poor policies	2013	SHC	Narrative case study	EXCLUDED
Polesny Z ; Verner V ; Vlkova M ; Banout J ; Lojka B ; Valicek P ; Mazancova J ;	Non-timber forest products utilization in Phong Dien Nature Reserve, Vietnam: Who collects, who consumes, who sells?	2014	SHC	No comparisons	EXCLUDED
Poudel DP ;	REDD+ comes with money, not with development: an analysis of post-pilot project scenarios from the community forestry of Nepal Himalaya	2014	SHC	No outcome	EXCLUDED
Poudel M ; Thwaites R ; Race D ; Dahal GR ;	REDD plus and community forestry: implications for local communities and forest management- a case study from Nepal	2014	SHC	Qualitative data	EXCLUDED
Poudel Mohan ; Thwaites Rik ; Race Digby ; Dahal Ganga Ram;	Social equity and livelihood implications of REDD+ in rural communities - a case study from Nepal	2015	SHC	Qualitative data	EXCLUDED
Poudyal M ; Ramamonjisoa BS ; Hockley N ; Rakotonarivo OS ; Gibbons JM ; Mandimbiniaina R ; Rasoamanana A ; Jones JPG ;	Can REDD plus social safeguards reach the 'right' people? Lessons from Madagascar	2016	SHC	No comparisons	EXCLUDED
Pouliot M ;	Contribution of "Women's Gold" to West African Livelihoods: The Case of Shea (Vitellaria paradoxa) in Burkina Faso	2012	SHC	No intervention	EXCLUDED
Poungngamchuen J ; Namvises K ;	People s participation in Dong Na Tham community forest management project, Ubon Ratchathani, Thailand	2012	SHC	No comparisons	EXCLUDED
Poynter M ;	Collaborative forest management in Victoria's Wombat State Forest - Will it serve the interests of the wider community?	2005	SHC	No outcome	EXCLUDED
Pradeep Khanna ; Kamboj R D; Alpana Srivastava ;	A conscious and continuous strategy: women's empowerment through food assistance and joint forest management	2002	SHC	CANNOT LOCATE	CANNOT LOCATE
Prante Tyler ; Thacher Jennifer A; Mccollum Daniel W; Berrens Robert P;	Building social capital in forest communities: Analysis of New Mexico's Collaborative Forest Restoration Program	2007	SHC	No outcome	EXCLUDED
Prasad R ; Kant S ;	Institutions, forest management, and sustainable human development - Experiences from India	2003	SHC	Study design	EXCLUDED
Pratibha Bhatnagar ; Maneesh Goswami ; Kiran Kawde ;	Sustainable harvesting, processing and marketing of gums in Chambal region of Madhya Pradesh	2012	SHC	CANNOT LOCATE	CANNOT LOCATE
Pratibhar Bhatnagar ; Shrivastava A ; Nisha Pandey ;	Prospects of marketing Cassia tora under a different institutional set up : a study of Mandla district	1996	SHC	NO ACCESS	NO ACCESS
Price R A. I; Saf ;	Toward empowerment and prosperity: The minority and limited resource landowner forestry project	2001	SHC	CANNOT LOCATE	CANNOT LOCATE
Prudham Scott ;	Tall among the trees: Organizing against globalist forestry in rural British Columbia	2008	SHC	Study design	EXCLUDED
Pulhin J M; Dressler W H;	People, power and timber: The politics of community-based forest management	2009	SHC	Qualitative data	EXCLUDED
Pulhin J M; Inoue M ; Enters T ;	Three decades of community-based forest management in the Philippines: emerging lessons for sustainable and equitable forest management	2007	SHC	REVIEW	EXCLUDED
Pulhin J M; Lasco R D; Pulhin F B; Ramos L ; Peras R J. J;	CLIMATE CHANGE ADAPTATION AND COMMUNITY FOREST MANAGEMENT	2010	SHC	Book	EXCLUDED
Pulhin JM ; Ramirez MAM ;	Timber Regulation and Value Chain in Community-Based Timber Enterprise and Smallholder Forestry in the Philippines	2016	SHC	No outcome	EXCLUDED
Pushpakumara D K. N. G;	Proceedings of 2nd International Conference on Agriculture and Forestry, ICOAF - 2015, Colombo, Sri Lanka, 10-12 June 2015	2015	SHC	Study topic	EXCLUDED
Putzel L ; Dermawan A ; Moeliono M ; Trung L Q;	Improving opportunities for smallholder timber planters in Vietnam to benefit from domestic wood processing	2012	SHC	No outcome	EXCLUDED
Pyhala A ; Brown K ; Adger W N;	Implications of livelihood dependence on non-timber products in Peruvian Amazonia	2006	SHC	Dependence	EXCLUDED
Qin Ping ; Xu Jintao ;	Forest land rights, tenure types, and farmers' investment incentives in China An empirical study of Fujian Province	2013	SHC	NO ACCESS	NO ACCESS
Quaedvlieg J ; García Roca ; I M ; Ros-Tonen M A. F;	Is Amazon nut certification a solution for increased smallholder empowerment in peruvian amazonia?	2014	SHC	Study design	EXCLUDED
Quang D V; Anh T N;	Commercial collection of NTFPs and households living in or near the forests: Case study in Que, Con Cuong and Ma, Tuong Duong, Nghe An, Vietnam	2006	SHC	No intervention	EXCLUDED
Quang Fukuoka Japan). Faculty of Agriculture; N V Kyushu Univ; Sato N ;	The role of forest in people's livelihood: A case study in North-eastern Vietnam	2008	SHC	No intervention	EXCLUDED
Quinion Ann ; Chirwa Paxie W; Akinnifesi Festus K; Ajayi Oluyede C;	Do agroforestry technologies improve the livelihoods of the resource poor farmers? Evidence from Kasungu and Machinga districts of Malawi	2010	SHC	No comparison	EXCLUDED
Rabbi F ; Bauer S ; Idalinya J ;	Contribution of forests to rural inequality reduction: Present scope and future options for rural development and sustainable use of forests	2010	SHC	Dependence	EXCLUDED
Race Digby ; Sumirat Bugi ;	Exploring the Implications of Social Inequalities in Community Forestry: Emerging Lessons from Two Forests in Indonesia	2015	SHC	NO ACCESS	NO ACCESS
Raes Leander ; Aguirre Nikolay ; D'Haese Marijke ; Huylenbroeck Guido ;	Analysis of the cost-effectiveness for ecosystem service provision and rural income generation: a comparison of three different programs in Southern Ecuador	2014	SHC	No comparision	EXCLUDED
Rahim M A; Anwar M M; Alam M S;	Moringa: an indigenous high value underutilized vegetable crop can play a great role in nutrition and poverty alleviation in Bangladesh	2015	SHC	Study design	EXCLUDED
Rahman H M Tuihedur; Deb Jiban Chandra; Hickey Gordon M; Kayes Imrul ;	Contrasting the financial efficiency of agroforestry practices in buffer zone management of Madhupur National Park, Bangladesh	2014	SHC	No comparison	EXCLUDED
Rahman HMT ; Sarker SK ; Hickey GM ; Haque MM ; Das N ;	Informal Institutional Responses to Government Interventions: Lessons from Madhupur National Park, Bangladesh	2014	SHC	NO ACCESS	NO ACCESS
Rai RK ; Neupane P ; Dhakal A ;	Is the contribution of community forest users financially efficient? A household level benefit-cost analysis of community forest management in Nepal	2016	SHC	No comparision	EXCLUDED
Ramadhani A ;	Promoting good forest governance for sustainable livelihood improvement: A Tanzanian example	2010	SHC	Narrative case study	EXCLUDED
Ramaharitra Tondrasoa ; T ;	Human Dimension of Conservation Planning : The Case of Madagascar at National and Regional Scales	2012	SHC	Thesis	EXCLUDED
Ramaswami A ; Zimmerman J B; Mihelcic J R;	Integrating developed and developing world knowledge into global discussions and strategies for sustainability. 2. Economics and governance	2007	SHC	Study design	EXCLUDED
Rambo A Terry; Vien T R A N Duc;	Social Organization and the Management of Natural Resources : A Case Study of Tat Hamlet , a Da Bac Tay Ethnic Minority Settlement in Vietnam s Northwestern Mountains	2001	SHC	Study design	EXCLUDED
Ramcilovic-Suominen Sabaheta ; Matero Jukka ; Shannon Margaret A;	Do Forest Values Influence Compliance with Forestry Legislation? The Case of Farmers in the Fringes of Forest Reserves in Ghana	2013	SHC	No outcome	EXCLUDED
Rana Parvez ; Sohel Shawkat ; Islam Shariful ; Akhter Sayma ; Chowdhury Mohammad Shaheed; Alamgir Mohammed ; Koike Masao ;	Traditional practice of palm husbandry in the southeastern region of rural Bangladesh: status and potentials	2009	SHC	No intervention	EXCLUDED
Rantala Salla ; Bullock Renee ; Mbegu Mwilla A; German Laura A;	Community-Based Forest Management: What Scope for Conservation and Livelihood Co-Benefits? Experience from the East Usambara Mountains, Tanzania	2012	SHC	No comparisons	EXCLUDED
Rao K R M; Manikandan M S; Leal W ;	An overview of the impacts of changes in common property resources management in the context of globalisation: A case study of India	2005	SHC	NO ACCESS	NO ACCESS
Rao K S; Saxena K G;	Minor forest products' management: problems and prospects in remote high altitude villages of Central Himalaya	1996	SHC	No comparisons	EXCLUDED
Rao Madhu ; Htun Saw ; Zaw Than ; Myint Than ;	Hunting, Livelihoods and Declining Wildlife in the Hponkanrazi Wildlife Sanctuary, North Myanmar	2010	SHC	No intervention	EXCLUDED
Rashid AZMM ; Khan NA ;	Role of Co-management Organizations in Protected Area Governance: Some Observations from the Chunati Wildlife Sanctuary	2014	SHC	NO ACCESS	NO ACCESS
Rawat R B. S; Bhattarai N ; Choudhary D ;	Poverty reduction through medicinal and aromatic plants-based enterprise development and private sector collaboration	2008	SHC	CANNOT LOCATE	CANNOT LOCATE
Rechlin M a; Hammett a L; Burch W R; Song Y ;	Sharing the wealth: A comparative study of the distribution of benefits from community forestry management in southern China and Nepal	2002	SHC	Qualitative data	EXCLUDED
Reddeppa L ;	Role of Vana Samrakshana Samithies in promoting sustainable development of tribals	2008	SHC	Study design	EXCLUDED
Reddy V Ratna; Reddy M Gopinath; Galab S ; Soussan John ; Springate-Baginski Oliver ;	Participatory watershed development in India: Can it sustain rural livelihoods?	2004	SHC	Not specifically forest	EXCLUDED
Reed Maureen G;	Guess who's (not) coming for dinner: Expanding the terms of public involvement in sustainable forest management	2010	SHC	Narrative case study	EXCLUDED
Reed Maureen G; Davidson Debra ;	Terms of Engagement: The Intersections Among Gender, Class and Race in Canadian Sustainable Forest Management	2011	SHC	NO ACCESS	NO ACCESS
Regmi B N; Garforth C ;	Trees outside forests and rural livelihoods: A study of Chitwan District, Nepal	2010	SHC	No comparison	EXCLUDED
Reid R ; Stone M ; Whitely T ;	Economic value of wilderness protection and recreation in British Columbia	1995	SHC	No outcome	EXCLUDED
Reimer J K Kila; Walter Pierre ;	How do you know it when you see it? Community-based ecotourism in the Cardamom Mountains of southwestern Cambodia	2013	MCM	Qualitative data	EXCLUDED
Reisland M A;	Conservation in a Sacred Forest: An Integrated Approach to Assessing the Management of a Community-Based Conservation Site	2013	MCM	Qualitative data	EXCLUDED
Reyes R ; Nelson H ;	A tale of two forests: why forests and forest conflicts are both growing in Chile	2014	SHC	NO ACCESS	NO ACCESS
Ribot J C;	Theorizing access: Forest profits along Senegal's charcoal commodity chain	1998	SHC	No comparisons	EXCLUDED
Ribot J C; Lund J F; Treue T ;	Democratic decentralization in sub-Saharan Africa: Its contribution to forest management, livelihoods, and enfranchisement	2010	SHC	Review	EXCLUDED
Ribot Jesse ; Larson Anne M;	Reducing REDD risks: affirmative policy on an uneven playing field	2012	SHC	Narrative case study	EXCLUDED
Richards M ;	Protected areas, people and incentives in the search for sustainable forest conservation in Honduras	1996	SHC	NO ACCESS	NO ACCESS
Rijal A ;	The Chepang and forest conservation in the central mid-hills of Nepal	2010	MCM	No intervention	EXCLUDED
Rinzin C ; Vermeulen W J. V; Wassen M J; Glasbergen P ;	Nature Conservation and Human Well-Being in Bhutan: An Assessment of Local Community Perceptions	2009	MCM	No intervention	EXCLUDED
Rishi Parul ;	Joint forest management in India: An attitudinal analysis of stakeholders	2007	SHC	No outcome	EXCLUDED
RISHI PARUL ;	Pluralism in Protected Area Management: a Case Study on Keoladeo National Park in India	2004	SHC	No comparision	EXCLUDED
Robalino Juan ; Villalobos Laura ;	Protected areas and economic welfare: an impact evaluation of national parks on local workers' wages in Costa Rica	2015	SHC	No intervention	EXCLUDED
Robinson E J. Z; Lokina R B;	A spatial-temporal analysis of the impact of access restrictions on forest landscapes and household welfare in Tanzania	2011	SHC	Modeling	EXCLUDED
Robledo C ; Clot N ; Hammill A ; Riche B ;	The role of forest ecosystems in community-based coping strategies to climate hazards: Three examples from rural areas in Africa	2012	SHC	No comparisons	EXCLUDED
Robson Mark ;	Relative influence of contextual factors on deliberation and development of cooperation in community-based forest management in Ontario, Canada	2014	SHC	No outcome	EXCLUDED
Rodgers W A; Nabanyumya R ; Mupada E ; Persha L ;	Community conservation of closed forest biodiversity in East Africa: Can it work?	2002	SHC	Narrative case study	EXCLUDED
Rodríguez de Francisco; Jean Carlo ; Budds Jessica ; Boelens Rutgerd ;	Payment for Environmental Services and Unequal Resource Control in Pimampiro, Ecuador	2013	SHC	Qualitative data	EXCLUDED
Rodriguez L G; Perez M R; Yang X ; Fu M ; Geriletu ; Wu D ;	Changing contribution of forests to livelihoods: evidence from Daxi Village, Zhejiang Province, China	2009	SHC	No intervention	EXCLUDED
Rodriguez-Izquierdo E ; Gavin M C; Macedo-Bravo M O;	Barriers and triggers to community participation across different stages of conservation management	2010	SHC	No comparisons	EXCLUDED
Ronnback P ; Crona B ; Ingwall L ;	The return of ecosystem goods and services in replanted mangrove forests: perspectives from local communities in Kenya	2007	SHC	Study design	EXCLUDED
Roshetko J M; Idris N ; Purnomosidhi P ; Zulfadhli T ; Tarigan J ;	Farmer extension approach to rehabilitate smallholder fruit agroforestry systems: The "nurseries of excellence (NOEL)" program in Aceh, Indonesia	2013	SHC	Narrative case study	EXCLUDED
Roshetko J M; Rohadi D ; Perdana A ; Sabastian G ; Nuryartono N ; Pramono A A; Widyani N ; Manalu P ; Fauzi M A; Sumardamto P ; Kusumowardhani N ;	Teak agroforestry systems for livelihood enhancement, industrial timber production, and environmental rehabilitation	2013	SHC	No comparisons	EXCLUDED
Roshetko J M; Snelder D J; Lasco R D; Van Noordwijk ; M ;	Future Challenge: A Paradigm Shift in the Forestry Sector	2008	SHC	Study design	EXCLUDED
Roy A K. D; Alam K ; Gow J ;	A review of the role of property rights and forest policies in the management of the Sundarbans Mangrove Forest in Bangladesh	2012	SHC	Qualitative data	EXCLUDED
Roy Rabindra ; Schmidt-Vogt Dietrich ; Myrholt Olav ;	``Humla Development Initiatives'' for Better Livelihoods in the Face of Isolation and Conflict	2009	SHC	Narrative case study	EXCLUDED
Ruben Ruerd ; Zuniga Guillermo ;	How standards compete: comparative impact of coffee certification schemes in Northern Nicaragua	2011	SHC	NO ACCESS	NO ACCESS
Ruiz-Mallen I ; Barraza L ;	Environmental learning in adolescents from a Mexican community involved in forestry	2006	SHC	No outcome	EXCLUDED
Ruiz-Mallen I ; Corbera E ; Calvo-Boyero D ; Reyes-Garcia V ; Brown K ;	How do biosphere reserves influence local vulnerability and adaptation? Evidence from Latin America	2015	SHC	No comparisons	EXCLUDED
Ruiz-Perez Manuel ; Almeida Mauro ; Dewi Sonya ; Costa Eliza Mara Lozano; Pantoja Mariana Ciavatta; Puntodewo Atie ; de Postigo ; Augusto Arruda ; de Andrade ; Alexandre Goulart ;	Conservation and development in Amazonian extractive reserves: the case of Alto Jurua.	2005	SHC	No outcomes	EXCLUDED
Russell D ; Asare R A; Brosius J P; Witter R C; Welch-Devine M L; Spainhower K ; Barr R ;	People, trees, and parks: Is agroforestry in or out?	2010	SHC	Narrative case study	EXCLUDED
Rutt RL ;	Reconceptualizing the social contributions of community forestry as citizenship	2015	SHC	No comparisons	EXCLUDED
Saayman M ; Saayman A ; Ferreira M ;	The socio-economic impact of the Karoo National Park	2009	SHC	No comparisons	EXCLUDED
Sachedina Hassanali T;	Disconnected Nature: The Scaling Up of African Wildlife Foundation and its Impacts on Biodiversity Conservation and Local Livelihoods	2010	SHC	Study topic	EXCLUDED
Saha N ; Azam M A;	Betel leaf based forest farming by Khasia tribes: A sustainable system of forest management in Moulvibazar district, Bangladesh	2005	SHC	No comparison	EXCLUDED
Sahn D E;	The impact of export crop production on nutritional status in Cote d'Ivoire	1990	SHC	Study topic	EXCLUDED
Sahoo UK ;	Traditional home gardens and livelihood security in North-East India | Poverty and Conservation	2009	SHC	No outcomes	EXCLUDED
Saito-Jensen M ; Nathan I ; Treue T ;	Beyond elite capture? Community-based natural resource management and power in Mohammed Nagar village,\nAndhra Pradesh, India	2010	MCM	Qualitative data	EXCLUDED
Salafsky N ; Wollenberg E ;	Linking livelihoods and conservation: A conceptual framework and scale for assessing the integration of human needs and biodiversity	2000	SHC	Study design	EXCLUDED
Salam Md A; Noguchi T ; Pothitan R ;	Community forest management in Thailand: Current situation and dynamics in the context of sustainable development	2006	SHC	NO ACCESS	NO ACCESS
Salkini A K; Pauw E de;	The role of medicinal plants in oak forests in Idleb, North-west Syria, in improving incomes of the rural poor	2009	SHC	No outcome, no comparisons	EXCLUDED
Salum Layla A;	Ecotourism and biodiversity conservation in Jozani – Chwaka Bay National Park , Zanzibar	2009	SHC	No outcome	EXCLUDED
Sam Van ; Hoang ; Baas P ; Kessler P J. A;	Uses and conservation of plant species in a national park - a case study of Ben En, Vietnam	2008	SHC	No outcome	EXCLUDED
Samari D ;	Community forestry extension for sustainable development of Iran's forests	2012	SHC	NO ACCESS	NO ACCESS
Samndong R A; Vatn A ;	Forest related conflicts in South-East Cameroon: Causes and policy options	2012	SHC	No comparisons	EXCLUDED
Sampaio Maurcio Bonesso; Ticktin Tamara ; Seixas Cristiana Simao; dos Santos ; Flavio Antonio ;	Effects of Socioeconomic Conditions on Multiple Uses of Swamp Forests in Central Brazil	2012	SHC	No outcome	EXCLUDED
Sanchez P A;	Delivering on the promise of agroforestry	1999	SHC	NO ACCESS	NO ACCESS
Sanchez P A; Buresh R J; Leakey R R. B;	Trees, soils, and food security	1997	SHC	No outcome	EXCLUDED
Sandbrook C ; Nelson F ; Adams W M; Agrawal A ;	Carbon, forests and the REDD paradox	2010	SHC	Review	EXCLUDED
Sandewall M ; Kassa H ; Wu S ; Khoa PV ; He Y ; Ohlsson B ;	Policies to promote household based plantation forestry and their impacts on livelihoods and the environment: cases from Ethiopia, China, Vietnam and Sweden	2015	SHC	No comparisons	EXCLUDED
Sandker Marieke ; Bokoto-de Semboli ; Bruno ; Roth Philipp ; Pellisier Cyril ; Ruiz-Perez Manuel ; Sayer Jeff ; Turkalo Andrea K; Omoze Ferdinand ; Campbell Bruce M;	Logging or Conservation Concession: Exploring Conservation and Development Outcomes in Dzanga-Sangha, Central African Republic	2011	SHC	Modeling	EXCLUDED
Sandker Marieke ; Ruiz-Perez Manuel ; Campbell Bruce M;	Trade-Offs Between Biodiversity Conservation and Economic Development in Five Tropical Forest Landscapes	2012	SHC	Modeling	EXCLUDED
Sang D T; Ogata K ; Yabe M ;	Contribution of forest resources to local people's income: A case study in cat tien biosphere reserve, Vietnam	2010	SHC	No intervention	EXCLUDED
Sangeetha R ; Shanmugam T R;	External Benefit and External Cost in the Economics Agroforestry Systems in North Western Parts of Tamil Nadu	2015	SHC	NO ACCESS	NO ACCESS
Sanginga Pascal C; Kamugisha Rick N; Martin Adrienne M;	Conflicts management, social capital and adoption of agroforestry technologies: empirical findings from the highlands of southwestern Uganda	2007	SHC	Adoption of methods	EXCLUDED
Sanogo Diaminatou ; N'Diaye Mamadou ; Badji Marcel ; Ababacar Beye ; Seydi ;	Optimisation de l'utilisation des ressources communes dans le bassin arachidier du Sénégal : évaluation ex ante de plans et d'alternatives de gestion durable	2014	SHC	French	EXCLUDED
Santacoloma P ;	Agroforestry for resource-poor farmers: A deeper understanding from the Brazilian Savannah	2002	SHC	No comparision	EXCLUDED
SARIN M ;	REGENERATING INDIA FORESTS - RECONCILING GENDER EQUITY WITH JOINT FOREST MANAGEMENT	1995	SHC	NO ACCESS	NO ACCESS
Sarkar S K; Chattopadhyay R N;	The extent of economic viability of institutions formed for JFM - case study from Midnapore District of West Bengal	2002	SHC	NO ACCESS	NO ACCESS
Sarker Debnarayan ; Das Nimai ;	Social Capital and Joint Forest Management Programme: A Comparative Study on Female-headed and Joint Forest Protection Committees in West Bengal	2004	SHC	No comparisons	EXCLUDED
Satyanarayana B ; Bhanderi P ; Debry M ; Maniatis D ; Fore F ; Badgie D ; Jammeh K ; Vanwing T ; Farcy C ; Koedam N ; Dahdouh-Guebas F ;	A socio-ecological assessment aiming at improved forest resource management and sustainable ecotourism development in the mangroves of Tanbi Wetland National Park, the Gambia, West Africa	2012	SHC	No outcome	EXCLUDED
Saunders Fred ;	It's like herding monkeys into a conservation enclosure: The formation and establishment of the Jozani-Chwaka Bay National Park, Zanzibar, Tanzania	2011	MCM	Qualitative data	EXCLUDED
Saunders Fred ; Mohammed Salim M; Jiddawi Narriman ; Sjoling Sara ;	An examination of governance arrangements at Kisakasaka mangrove reserve in Zanzibar	2008	SHC	Qualitative data	EXCLUDED
Savage A ; Guillen R ; Lamilla I ; Soto L ;	Developing an effective community conservation program for cotton-top tamarins (Saguinus oedipus) in Colombia	2010	SHC	No outcomes	EXCLUDED
Schachenmann P ;	Spiritual values in Madagascar - The starting point for endogenous conservation initiatives	2006	MCM	Narrative case study	EXCLUDED
Scheba A ; Mustalahti I ;	Rethinking 'expert' knowledge in community forest management in Tanzania	2015	SHC	No outcome	EXCLUDED
Schelhas John ; Sherman Ruth E; Fahey Timothy J; Lassoie James P;	Linking community and national park development: A case from the Dominican Republic	2002	SHC	No comparisons	EXCLUDED
Scherr S J;	Economic factors in farmer adoption of agroforestry: Patterns observed in Western Kenya	1995	SHC	No outcome	EXCLUDED
Schloegel C ;	Sustainable tourism: Sustaining biodiversity?	2007	SHC	Study design	EXCLUDED
Schmerbeck Joachim ; Seeland Klaus ;	Fire supported forest utilisation of a degraded dry forest as a means of sustainable local forest management in Tamil Nadu South India	2007	SHC	Study design	EXCLUDED
Schmidt M ;	Changing human-environment interrelationships in Kyrgyzstan's walnut-fruit forests	2012	SHC	No outcome	EXCLUDED
Schmidt-Soltau K ;	The costs of rainforest conservation: Local responses towards integrated conservation and development projects in Cameroon	2004	SHC	No comparision	EXCLUDED
Schmitt K ; Albers T ; Pham T T; Dinh S C;	Site-specific and integrated adaptation to climate change in the coastal mangrove zone of Soc Trang Province, Viet Nam	2013	SHC	No outcome	EXCLUDED
Schreckenberg K ; Awono A ; Degrande A ; Mbosso C ; Ndoye O ; Tchoundjeu Z ;	Domesticating indigenous fruit trees as a contribution to poverty reduction	2006	SHC	REVIEW	EXCLUDED
SCHRECKENBERG K ; DEGRANDE A ; MBOSSO C ; BABOULE Z BOLI; BOYD C ; ENYONG L ; KANMEGNE J ; NGONG C ;	THE SOCIAL AND ECONOMIC IMPORTANCE OF <i>DACRYODES EDULIS</i> (G.DON) H.J. LAM IN SOUTHERN CAMEROON	2002	SHC	No outcomes	EXCLUDED
Schreckenberg K ; Luttrell C ;	Participatory Forest Management: A Route to Poverty Reduction?	2009	MCM	Narrative case study	EXCLUDED
Schroeder R A;	"Re-claiming" land in the Gambia: Gendered property rights and environmental intervention	1997	SHC	Narrative case study	EXCLUDED
Schroth G ; Da Mota ; M D S. S;	Technical and institutional innovation in agroforestry for protected areas management in the brazilian amazon: Opportunities and limitations	2013	SHC	Narrative case study	EXCLUDED
Schumann K ; Wittig R ; Thiombiano A ; Becker U ; Hahn K ;	Uses, management, and population status of the baobab in eastern Burkina Faso	2012	SHC	No outcomes	EXCLUDED
Schure J ;	Woodfuel and producers' livelihoods in the Congo Basin	2012	SHC	No comparisons	EXCLUDED
Schure J ; Levang P ; Wiersum KF ;	Producing Woodfuel for Urban Centers in the Democratic Republic of Congo: A Path Out of Poverty for Rural Households?	2014	SHC	No comparisons	EXCLUDED
Schure Jolien ; Ingram Verina ; Sakho-Jimbira Maam Suwadu; Levang Patrice ; Wiersum K Freerk;	Formalisation of charcoal value chains and livelihood outcomes in Central- and West Africa	2013	SHC	Study design	EXCLUDED
Schusser C ; Krott M ; Movuh MCY ; Logmani J ; Devkota RR ; Maryudi A ; Salla M ;	Comparing community forestry actors in Cameroon, Indonesia, Namibia, Nepal and Germany	2016	SHC	No outcome, Study design	EXCLUDED
Schusser C ; Krott M ; Movuh MCY ; Logmani J ; Devkota RR ; Maryudi A ; Salla M ; Bach ND ;	Powerful stakeholders as drivers of community forestry - Results of an international study	2015	SHC	No comparison	EXCLUDED
Schwan Terry D; Elliott Ken A;	Effects of diameter-limit by-laws on forestry practices, economics, and regional wood supply for private woodlands in southwestern Ontario	2010	SHC	No outcome	EXCLUDED
Schwartzman S ; Zimmerman B ;	Conservation alliances with indigenous peoples of the Amazon	2005	SHC	Study design	EXCLUDED
Schwarze Stefan ; Schippers Bjoern ; Weber Robert ; Faust Heiko ; Wardhono Adhitya ; Zeller Manfred ; Kreisel Werner ;	Forest products and household incomes: Evidence from rural households living in the rainforest margins of Central Sulawesi	2007	SHC	No intervention	EXCLUDED
Scriven Joel Nh; Malhi Yadvinder ;	Smallholder REDD+ strategies at the forest–farm frontier: a comparative analysis of options from the Peruvian Amazon	2012	SHC	No comparison	EXCLUDED
Sears Robin R; Pinedo-Vasquez Miguel ;	Forest Policy Reform and the Organization of Logging in Peruvian Amazonia	2011	SHC	Study design	EXCLUDED
Secretariat of the Convention on Biological Diversity;	Recognizing the Role of Biodiversity for Human Well-being	2010	SHC	Study topic	EXCLUDED
Sekhar N U;	Traditional versus improved agroforestry systems in Vietnam: A comparison	2007	SHC	No comparison	EXCLUDED
Selomane O ; Reyers B ; Biggs R ; Tallis H ; Polasky S ;	Towards integrated social-ecological sustainability indicators: Exploring the contribution and gaps in existing global data	2015	SHC	Not forest	EXCLUDED
Sethi P ; Khan H ;	Structuring financial empowerment for localized development within joint forest management (JFM): Examples from Madhya Pradesh, India	2001	SHC	Study design	EXCLUDED
Setty R S; Bawa K ; Ticktin T ; Gowda C M;	Evaluation of a participatory resource monitoring system for nontimber forest products: The case of Amla (Phyllanthus spp.) fruit harvest by Soligas in South India	2008	SHC	No outcome	EXCLUDED
SHAANKER R UMA; K N GANESHAIAH; KRISHNAN1 SMITHA ; R RAMYA ; C MEERA ; N A ARAVIND; ARVINDKUMAR ; RAO1 DINESH ; J RAMACHANDRA ; GAUTHIE REMI ; GHAZOUL JABOURY ; POOLE NIGEL ; REDDY B V.CHINNAPPA;	Livelihood gains and ecological costs of non-timber forest product dependence: assessing the roles of dependence, ecological knowledge and market structure in three contrasting human and ecological settings in south India	2004	MCM	No comparisons	EXCLUDED
Shackleton C M; McGarry D ; Fourie S ; Gambiza J ; Shackleton S E; Fabricius C ;	Assessing the effects of invasive alien species on rural livelihoods: Case examples and a framework from South Africa	2007	SHC	No intervention	EXCLUDED
Shackleton C M; Shackleton S E; Buiten E ; Bird N ;	The importance of dry woodlands and forests in rural livelihoods and poverty alleviation in South Africa	2007	SHC	REVIEW	EXCLUDED
Shackleton C M; Shackleton S E; Gambiza J ; Nel E ; Rowntree K ; Urquhart P ; Fabricius C ; Ainslie A ;	PROVISIONING SERVICES AND HUMAN WELL-BEING	2010	SHC	NO ACCESS	NO ACCESS
Shackleton C M; Timmermans H G; Nongwe N ; Hamer N ; Palmer N R;	Direct-use Values of Non-Timber Forest Products from two areas on the Transkei Wild Coast	2007	MCM	No comparisons	EXCLUDED
Shackleton Charlie ; Shackleton Sheona ;	The importance of non-timber forest products in rural livelihood security and as safety nets: a review of evidence from South Africa	2004	SHC	No comparison	EXCLUDED
Shackleton Charlie M; Shackleton Sheona E;	Household wealth status and natural resource use in the Kat River valley, South Africa	2006	SHC	No intervention	EXCLUDED
Shackleton Charlie M; Shackleton Sheona E; Cousins Ben ;	The role of land-based strategies in rural livelihoods: The contribution of arable production, animal husbandry and natural resource harvesting in communal areas in South Africa	2001	SHC	No comparison	EXCLUDED
Shackleton S ; Paumgarten F ; Kassa H ; Husselman M ; Zida M ;	Opportunities for enhancing poor women's socioeconomic empowerment in the value chains of three African non-timber forest products (NTFPs)	2011	SHC	Study design	EXCLUDED
Shackleton S E; Shackleton C M; Cunningham T ; Lombard C ; Sullivan C A; Netshiluvhi T R;	Knowledge on Sclerocarya birrea subsp. caffra with emphasis on its importance as a non-timber forest product in South and southern Africa: A summary. Part 1: Taxonomy, ecology and role in rural livelihoods	2002	SHC	REVIEW, no outcomes	EXCLUDED
Shackleton Sheona ;	Livelihood benefits from the local level commercialization of savanna resources : a case study of the new and expanding trade in marula (Sclerocarya birrea) beer in Bushbuckridge, South Africa	2004	SHC	Study design	EXCLUDED
Shahbaz B ; Ali T ; Awais M ;	Perceived Impact of Participation in Forest Management on Natural and Social Capitals in Mansehra District of Pakistan	2012	SHC	Qualitative data	EXCLUDED
Shanley P ; da Serra Silva ; M ; Melo T ; Carmenta R ; Nasi R ;	From conflict of use to multiple use: Forest management innovations by small holders in Amazonian logging frontiers	2012	SHC	No comparision	EXCLUDED
Sharma R ; Xu J ; Sharma G ;	Traditional agroforestry in the eastern Himalayan region: Land management system supporting ecosystem services	2007	SHC	No comparison	EXCLUDED
Sharma R C;	Forest for poverty alleviation: Chhattisgarh experience | Poverty and Conservation	2005	SHC	CANNOT LOCATE	CANNOT LOCATE
Sharp A ; Nakagoshi N ;	Rehabilitation of degraded forests in Thailand: Policy and practice	2006	SHC	Study design	EXCLUDED
Shen X L; Lu Z ; Li S Z; Chen N M;	Tibetan Sacred Sites: Understanding the Traditional Management System and Its Role in Modern Conservation	2012	SHC	No outcome	EXCLUDED
Shen Y ; Zhnag Y ; Xu X ; Zhu Z ; Jiang C ;	Towards decentralization and privatization of China's collective forestlands: A study of nine villages in 3 provinces	2009	SHC	No comparision	EXCLUDED
Shinwari M I;	Sustainable utilization of moist temperate Himalayan medicinal plants in Pakistan	2007	SHC	Study topic	EXCLUDED
Shiro Chikamatsu ; Furtad Jose Ireneu; Shen Lixin ; Yan Mei ;	Coping with pressures of modernization by traditional farmers: A strategy for sustainable rural development in Yunnan, China	2007	SHC	Study design	EXCLUDED
Shisanya C A; Makokha M O; Kimani S K; Kalumuna M ; Tenge A ;	Farmer tree nursery as a catalyst for developing sustainable best management land use practices in Lake Victoria catchments ecosystem	2007	SHC	Adoption of methods	EXCLUDED
Shoeb M ; Castilla D L. de; Pottinger P ;	The forest for the trees: tuberculosis control efforts in west Kalimantan	2011	SHC	Narrative case study	EXCLUDED
Shrestha Krishna K; McManus Phil ;	The politics of community participation in natural resource management: lessons from community forestry in Nepal	2008	MCM	Narrative case study	EXCLUDED
Shrestha Uttam Babu; Bawa Kamaljit S;	Economic contribution of Chinese caterpillar fungus to the livelihoods of mountain communities in Nepal	2014	SHC	No intervention	EXCLUDED
Shrivastava V K; Theilade I ; Meilby H ;	Trade chain analysis of Ophiocordyceps sinensis and Tricholoma matsutake in Bhutan	2010	SHC	No comparisons	EXCLUDED
Shukla P K; Bisen S S;	Forestry research initiatives for poverty reduction	2005	SHC	Study design	EXCLUDED
SHUKLA SHAILESHKUMAR ;	Interconnections among community-based conservation , local knowledge and environmental education : Case studies from India	2007	SHC	Thesis	EXCLUDED
Shumsky S ; Hickey G M; Johns T ; Pelletier B ; Galaty J ;	Institutional factors affecting wild edible plant (WEP) harvest and consumption in semi-arid Kenya	2014	SHC	Qualitative data	EXCLUDED
Shyamsundar P ; Ghate R ;	Rights, Rewards, and Resources: Lessons from Community Forestry in South Asia	2014	SHC	REVIEW	EXCLUDED
Siebert S F;	Village-level cultivation and management of Calamus zollingeri in Sulawesi	1999	SHC	No outcome	EXCLUDED
Siiskonen Harri ;	The conflict between traditional and scientific forest management in 20th century Finland	2007	SHC	No outcome	EXCLUDED
Sikor T ; Baggio JA ;	Can Smallholders Engage in Tree Plantations? An Entitlements Analysis from Vietnam	2014	SHC	No outcome	EXCLUDED
Sills Erin ; Rodrigo Arriagada ; Ferraro Paul ; Pattanayak Subhrendu ; Carrasco Luis ; Ortiz Edgar ; Cordero Silvia ; Andam Kwaw ;	Impact of the PSA Program on Land Use	2008	SHC	No outcome	EXCLUDED
Silori Chandra Shekhar; Badola Ruchi ;	Medicinal Plant Cultivation and Sustainable Development		SHC	No intervention	EXCLUDED
Silva G ; McDill M E;	Analyzing extraction of non-timber forest products in Pintao, Venezuela	2000	SHC	CANNOT LOCATE	CANNOT LOCATE
Simitu P ; Jamnadass R ; Kindt R ; Kimiywe J ; Kungu J ;	Consumption of Dryland Indigenous Fruits to Improve Livelihoods in Kenya: the Case of Mwingi District	2009	SHC	NO ACCESS	NO ACCESS
Sinclair A John; Collins Susan A; Spaling Harry ;	The role of participant learning in community conservation in the Arabuko-Sokoke Forest, Kenya	2011	SHC	Qualitative data	EXCLUDED
Singh A ; Singh R K; Adi Women ; Community ;	Gekong-Galong-traditional weaving technology of Adi tribes of Arunachal Pradesh	2008	SHC	Narrative case study	EXCLUDED
Singh B ; Borthakur SK ;	FOREST ISSUES AND CHALLENGES IN PROTECTED AREA MANAGEMENT: A CASE STUDY FROM HIMALAYAN NOKREK NATIONAL PARK AND BIOSPHERE RESERVE, INDIA	2015	SHC	No outcome	EXCLUDED
Singh M K;	JFM and poverty alleviation: an analysis	2005	SHC	CANNOT LOCATE	CANNOT LOCATE
Singh R B; Hietala Reija eds;	Livelihood Security in Northwestern Himalaya: Case Studies from Changing Socio-economic Environments in Himachal Pradesh, India	2014	SHC	Book	EXCLUDED
Singh R K; Pretty J ; Pilgrim S ;	Traditional knowledge and biocultural diversity: Learning from tribal communities for sustainable development in northeast India	2010	SHC	Narrative case study	EXCLUDED
Singh R V;	Contribution of participatory forest management in the livelihoods of rural communities in India	2001	SHC	Narrative case study	EXCLUDED
Singh S Kr;	Conflicts and disturbance: Lessons from community-based natural resource management institutions in Orissa, India	2003	SHC	NO ACCESS	NO ACCESS
Singh V S; Pandey D N; Prakash N P;	What determines the success of joint forest management? Science-based lessons on sustainable governance of forests in India	2011	SHC	REVIEW	EXCLUDED
Sinha Bitapi C; Qureshi Qamar ; Uniyal V K; Sen S ;	Economics of wildlife tourism – contribution to livelihoods of communities around Kanha tiger reserve, India	2012	MCM	Not forest intervention	EXCLUDED
Sinha H ; Suar D ;	Values and People's Participation in Community Based Forest Management	2003	MCM	No outcome	EXCLUDED
Sinu Palatty Allesh; Kent Sean M; Chandrashekara Kruthik ;	Forest resource use and perception of farmers on conservation of a usufruct forest (Soppinabetta) of Western Ghats, India	2012	SHC	No comparisons	EXCLUDED
Siregar Ulfah J; Rachmi A ; Massijaya M Y; Ishibashi N ; Ando K ;	Economic analysis of sengon (Paraserianthes falcataria) community forest plantation, a fast growing species in East Java, Indonesia	2007	SHC	No comparison	EXCLUDED
Sirgmets Risto ; Kaimre Paavo ; Padari Allar ;	Economic impact of enlarging the area of protected forests in Estonia	2011	SHC	Modeling	EXCLUDED
Sirivongs K ; Tsuchiya T ;	Relationship between local residents' perceptions, attitudes and participation towards national protected areas: A case study of Phou Khao Khouay National Protected Area, central Lao PDR	2012	SHC	NO ACCESS	NO ACCESS
Sist P ; Sablayrolles P ; Barthelon S ; Sousa-Ota L ; Kibler JF ; Ruschel A ; Santos-Melo M ; Ezzine-de-Blas D ;	The Contribution of Multiple Use Forest Management to Small Farmers' Annual Incomes in the Eastern Amazon	2014	SHC	Modeling	EXCLUDED
Sitoe AA ; Guedes BS ;	Community Forestry Incentives and Challenges in Mozambique	2015	SHC	Narrative case study	EXCLUDED
Sitorus Tamen ;	Linking Conservation of Biodiversity and Community Livelihood in Komodo National Park, Indonesia	2011	MCM	No comparisons	EXCLUDED
Skog K ; Alexander S ; Bergstrom J ; Cordell K ; Hill E ; Howard J ; Westby R ;	Criterion 6, indicator 37: average wage rates, annual average income, and annual injury rates in major forest employment categories	2011	SHC	Study topic	EXCLUDED
Slater R ;	Between a rock and a hard place: contested livelihoods in Qwaqwa National Park, South Africa	2002	SHC	Narrative case study	EXCLUDED
Sletten M ; Vedeld P ; Kaboggoza J ;	To co-operate or not to co-operate? a study of collaborative management planning in Mount Elgon National Park	2008	SHC	CANNOT LOCATE	CANNOT LOCATE
Snyder K A; Sulle E B;	Tourism in maasai communities: A chance to improve livelihoods?	2011	SHC	CANNOT LOCATE	CANNOT LOCATE
Soaga J A;	Decline in flora diversity and poverty trap in a peri-urban settlement (Ijeun lukosi village) in Abeokuta, Ogun State, Nigeria	2012	SHC	No comparison	EXCLUDED
Sokh H ; Iida S ;	Community forestry models in southeast Asia and Cambodia: A comparative study	2001	SHC	CANNOT LOCATE	CANNOT LOCATE
Soltani A ; Angelsen A ; Eid T ; Naieni M S. N; Shamekhi T ;	Poverty, sustainability, and household livelihood strategies in Zagros, Iran	2012	SHC	No intervention	EXCLUDED
Soltani A ; Eid T ;	Organization, practices and performance of community-based traditional forest management - Empirical evidence from Zagros, Iran	2013	SHC	NO ACCESS	NO ACCESS
Sommerville M ; Milner-Gulland E J; Rahajaharison M ; Jones J P. G;	Impact of a community-based payment for environmental services intervention on forest use in Menabe, Madagascar	2010	SHC	No outcome	EXCLUDED
Sommerville Matthew ; Jones Julia P G; Rahajaharison Michael ; Milner-Gulland E J;	The role of fairness and benefit distribution in community-based Payment for Environmental Services interventions: A case study from Menabe, Madagascar	2010	SHC	No comparisons	EXCLUDED
Somorin Olufunso A; Visseren-Hamakers Ingrid J; Arts Bas ; Sonwa Denis J; Tiani Anne-Marie ;	REDD+ policy strategy in Cameroon: Actors, institutions and governance	2014	SHC	Study topic	EXCLUDED
Song L ; Cannon C H;	Impact of socio-economic status on the implementation of China's collective forest tenure reform in Zhang Guying Township, Hunan: Potential for increasing disparity	2011	SHC	CANNOT LOCATE	CANNOT LOCATE
Sopsop Lita B; Buot Jr ; Inocencio E ;	Human-forest interaction in Aborlan Guba System, Palawan Island, Philippines: Implications for Conservation and Management	2011	SHC	Modeling	EXCLUDED
Soto I ; Achten WMJ ; Muys B ; Mathijs E ;	Who benefits from energy policy incentives? The case of jatropha adoption by smallholders in Mexico	2015	SHC	Adoption of methods	EXCLUDED
Souphonphacdy Daovinh ; Yabe Mitsuyasu ; Sato Goshi ;	Impact of Rubber Concession on Rural Livelihood in Champasack Province, Lao PDR	2012	SHC	No comparison	EXCLUDED
SPALING HARRY ; MONTES JESSE ; SINCLAIR JOHN ;	Best Practices for Promoting Participation and Learning for Sustainability: Lessons From Community-Based Environmental Assessment in Kenya and Tanzania	2011	SHC	Study design	EXCLUDED
Speelman EN ; Groot JCJ ; Garcia-Barrios LE ; Kok K ; van Keulen H ; Tittonell P ;	From coping to adaptation to economic and institutional change - Trajectories of change in land-use management and social organization in a Biosphere Reserve community, Mexico	2014	SHC	Study design	EXCLUDED
Spenceley A ; Goodwin H ;	Nature-based tourism and poverty alleviation: impacts of private sector and parastatal enterprises in and around Kruger National Park, South Africa	2007	SHC	NO ACCESS	NO ACCESS
Spencer C ;	Linking forest employment and forest ecosystem objectives in the Pacific Northwest	1999	SHC	CANNOT LOCATE	CANNOT LOCATE
Springate-Baginski O ; Sarin M ; Reddy M G;	Resisting Rights: Forest Bureaucracy and the Tenure Transition in India	2013	SHC	No comparison	EXCLUDED
Sraku-Lartey M ;	Harnessing indigenous knowledge for sustainable forest management in Ghana	2014	SHC	REVIEW	EXCLUDED
STANLEY D L;	COMMUNAL FOREST MANAGEMENT - THE HONDURAN RESIN TAPPERS	1991	SHC	NO ACCESS	NO ACCESS
Stedman R C; Parkins J R; Beckley T M;	Resource dependence and community well-being in rural Canada	2004	SHC	No intervention	EXCLUDED
Stedman R C; Patriquin M N; Parkins J R;	Forest dependence and community well-being in rural Canada: A longitudinal analysis	2011	SHC	Dependence	EXCLUDED
Stepemick KF ; Green LT ;	Individual- and community-level impacts of volunteer environmental monitoring: a synthesis of peer-reviewed literature	2015	SHC	Study topic	EXCLUDED
Stevenson Marc G;	Aboriginal Peoples and Traditional Knowledge A Course Correction for Sustainable Forest Management	2013	SHC	Book	EXCLUDED
Stiem L ; Krause T ;	Exploring the impact of social norms and perceptions on women's participation in customary forest and land governance in the Democratic Republic of Congo-implications for REDD	2016	SHC	Qualitative data	EXCLUDED
Stoate C ; Jarju A K;	A participatory investigation into multifunctional benefits of indigenous trees in West African savanna farmland	2008	SHC	No outcomes	EXCLUDED
Stoian D ; Henkemans A B;	Between extractivism and peasant agriculture: differentiation of rural settlements in the Bolivian Amazon	2000	SHC	NO ACCESS	NO ACCESS
Stoian Dietmar ;	Making the Best of Two Worlds: Rural and Peri-Urban Livelihood Options Sustained by Nontimber Forest Products from the Bolivian Amazon	2005	SHC	No intervention	EXCLUDED
Stone Mike ; Wall Geoffrey ;	Ecotourism and community development: case studies from Hainan, China.	2004	MCM	Qualitative data	EXCLUDED
Stræde Steffen ; Treue Thorsten ;	Beyond buffer zone protection: a comparative study of park and buffer zone products' importance to villagers living inside Royal Chitwan National Park and to villagers living in its buffer zone.	2006	SHC	Subsistence	EXCLUDED
Strickland-Munro J ; Moore S ;	Indigenous involvement and benefits from tourism in protected areas: a study of Purnululu National Park and Warmun Community, Australia	2013	SHC	Qualitative data	EXCLUDED
Stronza A ;	The economic promise of ecotourism for conservation	2007	MCM	No comparisons	EXCLUDED
Stronza Amanda ; Gordillo Javier ;	Community views of ecotourism	2008	MCM	Qualitative data	EXCLUDED
Stryamets N ;	Non-wood forest products for livelihoods	2012	SHC	Qualitative data	EXCLUDED
Stryamets Nataliya ; Elbakidze Marine ; Angelstam Per ;	Role of non-wood forest products for local livelihoods in countries with transition and market economies: case studies in Ukraine and Sweden	2012	SHC	Qualitative data	EXCLUDED
Sturtevant V ;	Partnerships for Empowerment: Participatory Research for Community-Based Natural Resource Management	2011	SHC	Book	EXCLUDED
Subramanyam V ; Veerabhadrudu B ;	Forest ecology and health care: a study in Visakha agency of Andhra Pradesh, India	2014	SHC	Narrative case study	EXCLUDED
Sudtongkong C ; Webb E L;	Outcomes of state- vs. community-based mangrove management in Southern Thailand	2008	SHC	Narrative case study	EXCLUDED
Suh Jungho ;	The Past and Future of Community-Based Forest Management in the Philippines	2012	SHC	No comparisons	EXCLUDED
Suhardi ;	Biodiversity for poverty alleviation in Indonesia, in: Proceedings of the Workshop on Forests for Poverty Reduction: Opportunities with CDM, Environmental Services and Biodiversity | Poverty and Conservation	2004	SHC	No outcome	EXCLUDED
Sultana P ; Thompson P ;	Gender and local floodplain management institutions: a case study from Bangladesh	2008	SHC	Not forest	EXCLUDED
Sun Daowei ; Carter R W (Bill;	Extreme Seasons and Extreme Visitation: The Case of Changbai Mountain Biosphere Reserve	2009	SHC	Narrative case study	EXCLUDED
Sun Qiu ;	Rebuilding Common Property Management: a case study of community-based natural resource management in rural Guizhou, China	2007	SHC	Book	EXCLUDED
Sunam R K; McCarthy J F;	Advancing equity in community forestry: recognition of the poor matters	2010	SHC	Narrative case study	EXCLUDED
Sunderland T C. H; Pottinger A J;	Special Issue: Forests, biodiversity and food security	2011	SHC	Study design	EXCLUDED
Sunderland Terry ; Achdiawan Ramadhani ; Angelsen Arild ; Babigumira Ronnie ; Ickowitz Amy ; Paumgarten Fiona ; Reyes-Garcia Victoria ; Shively Gerald ;	Challenging Perceptions about Men, Women, and Forest Product Use: A Global Comparative Study	2014	SHC	Study design	EXCLUDED
Sunderlin W D;	Deforestation, livelihoods, and the preconditions for sustainable management in Olancho, Honduras	1997	SHC	NO ACCESS	NO ACCESS
Sunderlin W D; Angelsen A ; Belcher B ; Burgers P ; Nasi R ; Santoso L ; Wunder S ;	Livelihoods, forests, and conservation in developing countries: An overview	2005	SHC	REVIEW	EXCLUDED
Svarrer Kasper ; Olsen Carsten Smith;	The Economic Value of Non- Timber Forest Products — A Case Study from Malaysia	2005	SHC	No comparisons	EXCLUDED
Switzer Michelle B;	Planting Progress? The Everyday Impacts of Plantation Forestry on Small Farmers in Interior Uruguay	2014	SHC	Narrative case study	EXCLUDED
Syampungani S ; Chirwa P W; Akinnifesi F K; Sileshi G ; Ajayi O C;	The Miombo woodlands at the cross roads: Potential threats, sustainable livelihoods, policy gaps and challenges	2009	SHC	No outcome	EXCLUDED
Syampungani S ; Chirwa P W; Akinnifesi F K; Sileshi G ; Ajayi O C;	The miombo woodlands at the cross roads: potential threats, sustainable livelihoods, policy gaps and challenges	2009	SHC	Potential outcomes	EXCLUDED
Sylvester O ; Segura AG ; Davidson-Hunt IJ ;	Wild Food Harvesting and Access by Household and Generation in the Talamanca Bribri Indigenous Territory, Costa Rica	2016	SHC	Qualitative data	EXCLUDED
Szulecka J ; Secco L ;	Local institutions, social capital and their role in forest plantation governance: lessons from two case studies of smallholder plantations in Paraguay	2014	SHC	No comparison	EXCLUDED
Tacconi L ; Mahanty S ; Suich H ;	The Livelihood Impacts of Payments for Environmental Services and Implications for REDD+	2013	SHC	Narrative case study	EXCLUDED
Takahashi S ;	Challenges for local communities and livelihoods to seek sustainable forest management in Indonesia	2008	SHC	No outcome	EXCLUDED
Takasaki Y ; Barham B L; Coomes O T;	Risk coping strategies in tropical forests: floods, illnesses, and resource extraction	2004	SHC	No intervention	EXCLUDED
Tamirat Solomon ; Gebreslassie Welu ; Lemlem Tajebe ;	Contribution of the non timber forest products to the local communities in the case of Dodi Forest Tocha Woreda Dawro Zone, Ethiopia	2014	SHC	No intervention	EXCLUDED
Tang Ruifei ; Gavin Michael C;	Traditional Ecological Knowledge Informing Resource Management: Saxoul Conservation in Inner Mongolia, China	2010	SHC	No outcome	EXCLUDED
Tapan K N; Inoue M ;	Impacts of participatory forestry on livelihoods of ethnic people: Experience from Bangladesh	2010	SHC	No comparison	EXCLUDED
Taylor D A;	Income generation from non-wood forest products in upland conservation	1996	SHC	Book	EXCLUDED
Taylor MJ ; Aguilar-Stoen M ; Castellanos E ; Moran-Taylor MJ ; Gerkin K ;	International migration, land use change and the environment in Ixcan, Guatemala	2016	SHC	Not forest intervention	EXCLUDED
Taylor P L;	Producing More with Less? Community Forestry in Duraiigo, Mexico in an Era of Trade Liberalization	2000	SHC	Qualitative data	EXCLUDED
Taylor P L;	Conservation, community, and culture? New organizational challenges of community forest concessions in the Maya Biosphere Reserve of Guatemala	2010	SHC	No outcome	EXCLUDED
Taylor PL ; Cronkleton Peter ; Barry Deborah ;	Learning in the Field: Using Community Self Studies to Strengthen Forest‐Based Social Movements	2013	MCM	Qualitative data	EXCLUDED
Taylor Russell ;	Community based natural resource management in Zimbabwe: the experience of CAMPFIRE	2009	SHC	NO ACCESS	NO ACCESS
Tee T N; Ogwuche J A; Ikyaagba E T;	The Role of Locust Bean and Ironwood Trees in Human Nutrition and Income in Nigeria	2009	SHC	No	EXCLUDED
Tekalign T ; Kaba U ; Zerihun K ;	Challenges for improving forest conditions and forest based livelihoods through participatory forest management around Bonga, southwestern Ethiopia	2015	SHC	NO ACCESS	NO ACCESS
Temudo MarinaPadrão ;	"The White Men Bought the Forests": Conservation and Contestation in Guinea-Bissau, Western Africa	2012	SHC	No intervention	EXCLUDED
Tenaye A ; Geta E ; Hebana E ;	A multipurpose cabbage tree (Moringa stenopetala): production, utilization and marketing in SNNPR, Ethiopia	2009	SHC	NO ACCESS	NO ACCESS
Tesfaye Y ; Roos A ; Campbell B J; Bohlin F ;	Factors Associated with the Performance of User Groups in a Participatory Forest Management around Dodola Forest in the Bale Mountains, Southern Ethiopia	2012	SHC	No outcome	EXCLUDED
Tesfaye Y ; Roos A ; Campbell B M; Bohlin F ;	Livelihood strategies and the role of forest income in participatory-managed forests of Dodola area in the bale highlands, southern Ethiopia	2011	SHC	No outcome	EXCLUDED
Tewari D D;	Income and employment generation opportunities and potential of non-timber forest products (NTFPs): A case study of Gujarat, India	1999	SHC	No comparison	EXCLUDED
Thaworn Rawee ; Kelley L ; Yasmi Y ;	Can biodiversity conservation go hand in hand with local livelihoods? A case of conflict resolution in Thailand	2010	MCM	Qualitative data	EXCLUDED
Thiede J ;	Managing Michigan's state forests for sustainability	2000	SHC	No discrete population	EXCLUDED
Thin N ; van Gardingen ; P ;	Participatory forestry: Sharable lessons for better management of commons	2004	SHC	No comparison	EXCLUDED
Thomas-Slayter Barbara ; Bhatt Nina ;	Land, livestock, and livelihoods: Changing dynamics of gender, caste, and ethnicity in a Nepalese Village	1994	SHC	Study topic	EXCLUDED
Thompson J R; Elmendorf W F; McDonough M H; Burban L L;	Participation and conflict: Lessons learned from community forestry	2005	SHC	No intervention	EXCLUDED
Thoms Christopher A;	Constituting forest communities in the hills of Nepal	2007	SHC	No comparison	EXCLUDED
Thoms Christopher A; Karna Birendra K; Karmacharya Mukunda B;	Limitations of leasehold forestry for poverty alleviation in Nepal	2006	SHC	Narrative case study	EXCLUDED
Thongmanivong S ; Fujita Y ;	Recent land use and livelihood transitions in northern Laos	2006	SHC	No forest intervention	EXCLUDED
Thulstrup AW ;	Plantation livelihoods in central Vietnam: Implications for household vulnerability and community resilience	2014	SHC	Study design	EXCLUDED
Thygesen SH ; Lober T ; Skensved EM ; Hansen CP ;	Implementation of Participatory Forest Management in Kenya: a case study of Karima Forest	2016	SHC	NO ACCESS	NO ACCESS
Tieguhong J C; Nkamgnia E M;	Household dependence on forests around lobeke Nationa l Park, Cameroon	2012	SHC	No comparison	EXCLUDED
Tijani A ; Masuku M ; Raufu M ;	The Impact of the Fadama II Intervention on Rural Households in Kogi and Kwara States, Nigeria	2014	SHC	Study topic	EXCLUDED
Timah Emmanuel Ambe; Ajaga Nji ; Tita Divine F; Ntonga Leonard M; Bongsiysi Irene B;	Demographic pressure and natural resources conservation	2008	SHC	No comparison	EXCLUDED
Timko J ;	Exploring the links between HIV/AIDS and forests in Malawi: Morbidity, mortality, and changing dependence on forest resources	2013	SHC	No intervention	EXCLUDED
Tiwari B K; Tynsong H ; Lynser M B;	Forest management practices of the tribal people of Meghalaya, north-east India	2010	SHC	Narrative case study	EXCLUDED
Tiwari P C; Joshi B ;	Resource utilization pattern and rural livelihood in Nanda Devi biosphere reserve buffer zone villages, Uttarakhand, Himalaya, India	2009	SHC	NO ACCESS	NO ACCESS
Tiwari PC ; Joshi B ;	Local and regional institutions and environmental governance in Hindu Kush Himalaya	2015	SHC	No comparison	EXCLUDED
To P X; Dressler W H; Mahanty S ; Pham T T; Zingerli C ;	The Prospects for payment for ecosystem services (PES) in Vietnam: A Look at three payment schemes	2012	SHC	Qualitative data	EXCLUDED
Toksoy Devlet ; Alkan Suleyman ;	Labor force participation of women in forest villages and their income status: A case study of Trabzon	2010	SHC	No comparisons	EXCLUDED
Tolentino O ; Garcia-Frapolli E ; Porter-Bolland L ; Ruiz-Mallen I ; Reyes-Garcia V ; Sanchez-Gonzalez MC ; Lopez-Mendez ME ;	Triggering Community Conservation Through the Trade of Carbon Offsets: The Case of the Ejido Felipe Carrillo Puerto, Mexico	2015	SHC	Qualitative data	EXCLUDED
Tomaselli Maria Fernanda; Timko Joleen ; Kozak Robert ;	The Role of Government in the Development of Small and Medium Forest Enterprises: Case Studies from The Gambia	2012	SHC	Qualitative data	EXCLUDED
Tomićević J ; Bjedov I ; Obratov-Petković D ; Milovanović M ;	Exploring the park-people relation: Collection of vaccinium myrtillus L. by local people from Kopaonik National Park in Serbia	2011	SHC	No comparison	EXCLUDED
Tomich T P; Van Noordwijk ; M ; Vosti S A; Witcover J ;	Agricultural development with rainforest conservation: Methods for seeking best bet alternatives to slash-and-burn, with applications to Brazil and Indonesia	1998	SHC	Potential outcomes	EXCLUDED
Tongkul F ; Lasimbang C ; Lasimbang A ; Chin P ;	Traditional knowledge and SFM: Experience from Malaysia	2013	SHC	Narrative case study	EXCLUDED
Torres-Lezama A ; Vilanova E ; Ramirez-Angulo H ; Alciaturi G ;	Socioeconomic and Environmental Basis for the Development of Small Scale Forestry in a Highly Degraded Watershed in the Venezuelan Andes	2012	SHC	Potential outcomes	EXCLUDED
Torri Maria Costanza;	Mainstreaming local health through herbal gardens in India: a tool to enhance women active agency and primary health care?	2012	SHC	Qualitative data	EXCLUDED
Torri Maria Costanza;	Power, structure, gender relations and community-based conservation: The Cawswe study of the Sariska region, Rajasthan, India	2010	SHC	Qualitative data	EXCLUDED
Torri MariaCostanza ;	Conservation, relocation and the social consequences of conservation policies in protected areas: Case study of the Sariska Tiger Reserve, India	2011	SHC	Qualitative data	EXCLUDED
Tougiani A ; Guero C ; Rinaudo T ;	Community mobilisation for improved livelihoods through tree crop management in Niger	2009	SHC	Narrative case study	EXCLUDED
Tscharntke T ; Clough Y ; Bhagwat S A; Buchori D ; Faust H ; Hertel D ; Holscher D ; Juhrbandt J ; Kessler M ; Perfecto I ; Scherber C ; Schroth G ; Veldkamp E ; Wanger T C;	Multifunctional shade-tree management in tropical agroforestry landscapes - a review	2011	SHC	REVIEW	EXCLUDED
Tuihedur Rahman ; H M ; Deb J C; Hickey G M; Kayes I ;	Contrasting the financial efficiency of agroforestry practices in buffer zone management of Madhupur National Park, Bangladesh	2013	SHC	No comparison	EXCLUDED
Tumusiime David Mwesigye; Vedeld Paul ; Gombya-Ssembajjwe William ;	Breaking the law? Illegal livelihoods from a Protected Area in Uganda	2011	SHC	No intervention	EXCLUDED
Turner N J;	``Keeping it living{''}: Applications and relevance of traditional plant management in British Columbia to sustainable harvesting of non-timber forest products	2001	SHC	No outcome	EXCLUDED
Turner W R; Brandon K ; Brooks T M; Gascon C ; Gibbs H K; Lawrence K S; Mittermeier R A; Selig E R;	Global biodiversity conservation and the alleviation of poverty	2012	SHC	Study topic	EXCLUDED
Twine W ;	Multiple strategies for resilient livelihoods in communal areas of South Africa	2013	SHC	No intervention	EXCLUDED
Twine W ; Moshe D ; Netshiluvhi T ; Siphugu V ;	Consumption and direct-use values of savanna bio-resources used by rural households in Mametja, a semi-arid area of Limpopo province, South Africa	2003	SHC	No comparison	EXCLUDED
Tynsong H ; Tiwari B K;	Contribution of Phrynium capitatum WIlld. leaf a non timber forest product to the livelihoods of rural poor of South Meghalaya, North East India | Poverty and Conservation	2011	SHC	Narrative case study	EXCLUDED
Tynsong H ; Tiwari B K; Dkhar M ;	Contribution of NTFPs to cash income of the War Khasi community of southern Meghalaya, North-East India	2012	SHC	Daily use	EXCLUDED
Uberhuaga P ; Larsen H O; Treue T ;	Indigenous forest management in Bolivia: Potentials for livelihood improvement	2011	SHC	Narrative case study	EXCLUDED
Ulybina O ;	Participatory Forest Management: The experience of foreign-funded programmes in the Kyrgyz Republic	2015	SHC	Study design	EXCLUDED
Underwood DA ; Friesner D ; Cross J ;	Toward an Institutional Legitimation of Sustainability	2014	SHC	Potential outcomes	EXCLUDED
UNESCO ;	Biosphere reserves: The Seville Strategy and the Statutory Framework of the World Network	1996	SHC	Study topic	EXCLUDED
Upadhyay B ;	Women and natural resource management: Illustrations from India and Nepal	2005	SHC	REVIEW	EXCLUDED
Uprety D R;	Conflicts in natural resource management - Examples from community forestry	2006	SHC	No comparison	EXCLUDED
Uprety Y ; Poudel R C; Asselin H ; Boon E K; Shrestha K K;	Stakeholder perspectives on use, trade, and conservation of medicinal plants in the Rasuwa district of central Nepal	2011	SHC	No outcome	EXCLUDED
Uprety Y ; Poudel RC ; Gurung J ; Chettri N ; Chaudhary RP ;	Traditional use and management of NTFPs in Kangchenjunga Landscape: implications for conservation and livelihoods	2016	SHC	No outcome	EXCLUDED
Upton C ;	Social capital, collective action and group formation: Developmental trajectories in post-socialist mongolia	2008	SHC	No comparison	EXCLUDED
Ur-Rehman M ; Chisholm N ;	Factors Affecting Households' Participation in the Natural Resource Management Activities in District Abbottabad, NWFP, Pakistan: A Multivariate Analysis	2007	SHC	Adoption of practices	EXCLUDED
Urzedo DI ; Vidal E ; Sills EO ; Pina-Rodrigues FCM ; Junqueira RGP ;	Tropical forest seeds in the household economy: effects of market participation among three sociocultural groups in the Upper Xingu region of the Brazilian Amazon	2016	SHC	No comparison	EXCLUDED
Usongo L ; Nkanje B T;	Participatory approaches towards forest conservation: The case of Lobeke National Park, South east Cameroon	2004	SHC	Narrative case study	EXCLUDED
Utting-Chamorro Karla ;	Does Fair Trade Make a Difference? The Case of Small Coffee Producers in Nicaragua	2005	MCM	Qualitative data	EXCLUDED
Vachta K E; McDonough M H;	Participatory development and the sustainable city: community forestry in Detroit	2002	SHC	Qualitative data	EXCLUDED
Vadjunec J M;	Extracting a livelihood: Institutional and social dimensions of deforestation in the chico mendes extractive reserve, acre, Brazil	2011	SHC	No comparison	EXCLUDED
Vail D ; Hultkrantz L ;	Property rights and sustainable nature tourism: adaptation and mal-adaptation in Dalarna (Sweden) and Maine (USA)	2000	SHC	No discrete population	EXCLUDED
Valdez Gabriela Valeria Villavicencio; Hansen Eric N; Bliss John ;	Factors Impacting Marketplace Success of Community Forest Enterprises: The Case of TIP Muebles, Oaxaca, Mexico	2012	SHC	No outcome	EXCLUDED
Van Hoang ; S ; Baas P ; Kessler P J. A;	Uses and Conservation of Plant Species in a National Park-A Case Study of Ben En, Vietnam	2008	SHC	Daily use	EXCLUDED
Van Holt ; T ; Townsend W R; Cronkleton P ;	Assessing Local Knowledge of Game Abundance and Persistence of Hunting Livelihoods in the Bolivian Amazon Using Consensus Analysis	2010	SHC	No comparison	EXCLUDED
van Noordwijk ; M ; Suyamto D A; Lusiana B ; Ekadinata A ; Hairiah K ;	Facilitating agroforestation of landscapes for sustainable benefits: Tradeoffs between carbon stocks and local development benefits in Indonesia according to the FALLOW model	2008	SHC	Modeling	EXCLUDED
Varghese A ; Ticktin T ;	Regional variation in non-timber forest product harvest strategies, trade, and ecological impacts: The case of Black Dammar (Canarium strictum Roxb.) use and conservation in the Nilgiri Biosphere Reserve, India	2008	SHC	No outcome	EXCLUDED
Varughese G ; Ostrom E ;	The contested role of heterogeneity in collective action: Some evidence from community forestry in Nepal	2001	SHC	No comparision	EXCLUDED
Vedeld Paul ; Angelsen Arild ; Bojö Jan ; Sjaastad Espen ; Kobugabe Berg ; Gertrude ;	Forest environmental incomes and the rural poor	2007	SHC	No intervention	EXCLUDED
Vega M G; Carpinetti B ; Duarte J ; Fa J E;	Contrasts in Livelihoods and Protein Intake between Commercial and Subsistence Bushmeat Hunters in Two Villages on Bioko Island, Equatorial Guinea	2013	SHC	No comparisons	EXCLUDED
Venema H D;	Factor biases and promoting sustainable development: Adaptation to drought in the Senegal River basin	1996	SHC	No outcome	EXCLUDED
Venn T J; McGavin R L; Rogers H M;	Managing woodlands for income maximisation in western Queensland, Australia: clearing for grazing versus timber production	2003	SHC	Potential outcomes	EXCLUDED
Venter Sarah M; Witkowski Ed T F;	Fruits of our labour: contribution of commercial baobab (Adansonia digitata L.) fruit harvesting to the livelihoods of marginalized people in northern Venda, South Africa	2013	SHC	No comparison	EXCLUDED
Veron R ; Fehr G ;	State power and protected areas: Dynamics and contradictions of forest conservation in Madhya Pradesh, India	2011	SHC	Narrative case study	EXCLUDED
Viana A L; Santos R M. da S; Lins Neto ; N F de A; Mari M L. G; Bezerra S A. S; Monteiro N C;	Diagnostic use of forest resources in a riverside community in the Amazon Diagnostico do uso de recursos florestais em uma comunidade ribeirinha na Amazonia	2016	SHC	Portueguese	EXCLUDED
Vira B ; Wildburger C ; Mansourian S ;	Forests, trees and landscapes for food security and nutrition: a global assessment report	2015	SHC	No discrete population	EXCLUDED
Virapongse Arika ; Schmink Marianne ; Larkin Sherry ;	Value chain dynamics of an emerging palm fiber handicraft market in Maranhão, Brazil	2014	SHC	No comparison	EXCLUDED
Virtanen P ;	Community-based natural resource management in Mozambique: A critical review of the concept’s applicability at local level	2005	SHC	Narrative case study	EXCLUDED
Vishnudas S ; Savenije H H. G; Zaag P V. D;	Watershed development practices for ecorestoration in a tribal area - A case study in Attappady hills, South India	2012	SHC	Narrative case study	EXCLUDED
Visseren-Hamakers Ingrid J; McDermott Constance ; Vijge Marjanneke J; Cashore Benjamin ;	Trade-offs, co-benefits and safeguards: current debates on the breadth of REDD+	2012	SHC	Study design	EXCLUDED
Vo Van ; Thoan ;	Dependency on non-timber forest products by the Ma minority ethnic group in southern Central Highlands of Viet Nam	2004	SHC	No intervention	EXCLUDED
Vuletic Dijana ; Stojanovska Makedonka ; Avdibegovic Mersudin ; Nevenic Radovan ; Petrovic Nenad ; Posavec Stjepan ; Haska Hajri ; Peri Leonida ; Blagojevic Doni ;	Forest-Related Conflicts in the South-East European Region: Regional aspects and Case studies in Albania, Bosnia and Herzegovina, Croatia, Macedonia and Serbia	2010	SHC	No outcome	EXCLUDED
Wadley R L.<br; > ; Colfer C J.P.<br; > ; Hood I G.<br; > ;	Hunting primates and managing forests: the case of Iban forest farmers in Indonesian Borneo<br />		SHC	No comparisons	EXCLUDED
Walker Clara Isabella;	Stewardship as an educational process of social learning and change: two case studies conducted in the Western Cape	2011	SHC	Thesis	EXCLUDED
Wallis J ;	The 2nd Budongo Conference: Development through Conservation, Nyabyeya Forestry College, Masindi, Uganda, 7-8 September 2000	2001	SHC	Study design	EXCLUDED
Walsh Fiona ; Douglas Josie ;	No bush foods without people: the essential human dimension to the sustainability of trade in native plant products from desert Australia	2011	SHC	NO ACCESS	NO ACCESS
Walton Mark E M; Samonte-Tan Giselle P B; Primavera Jurgenne H; Edwards-Jones Gareth ; Le Vay ; Lewis ;	Are mangroves worth replanting? The direct economic benefits of a community-based reforestation project	2006	SHC	No comparison	EXCLUDED
Wan M ; Colfer C J P; Powell B ;	Forests, women and health: opportunities and challenges for conservation	2011	SHC	REVIEW	EXCLUDED
Wandersee Sarah Marie;	Land-Cover and Land-Use Change in Human-Environment Systems: Understanding Complex Interactions among Policy and Management, Livelihoods, and Conservation	2013	MCM	No outcome	EXCLUDED
Wang Guanpu ; Innes John L; Dai Shuangyou ; He Guohui ;	Achieving sustainable rural development in Southern China: the contribution of bamboo forestry	2008	SHC	NO ACCESS	NO ACCESS
Wang L ; Zhang Q F; Wei S P; Wang Q J;	Vegetation restoration model in a watershed of a coal mining area in the water and wind erosion crossing zone of the Loess Plateau	2009	SHC	NO ACCESS	NO ACCESS
Wang XL ; Felbermeier B ; El Kateb H ; Mosandl R ;	Household Forests and Their Role in Rural Livelihood: A Case Study in Shangnan County, Northern China	2015	SHC	No outcome	EXCLUDED
Wangel Marcus ; Blomkvist Hans ;	Rural Forest Management in Sierra Leone: The Role of Economic (In)Equality in Facilitating Collective Action	2013	SHC	No comparison	EXCLUDED
Ward J ;	The net economic benefits of recreation and timber production in selected New South Wales native forests	2003	SHC	NO ACCESS	NO ACCESS
Webb E L; Dhakal A ;	Patterns and drivers of fuelwood collection and tree planting in a Middle Hill watershed of Nepal	2011	SHC	No outcome	EXCLUDED
Webb Edward L; Sudtongkong Chanyut ;	Outcomes of State- vs. Community-Based Mangrove Management in Southern Thailand	2008	SHC	No outcome	EXCLUDED
West Paige ; Igoe James ; Brockington Dan ;	Parks and Peoples: The Social Impact of Protected Areas	2006	SHC	No discrete population	EXCLUDED
West TAP ;	Indigenous community benefits from a de-centralized approach to REDD plus in Brazil	2016	SHC	Narrative case study	EXCLUDED
Westermann O ; Ashby J ; Pretty J ;	Gender and social capital: the importance of gender differences for the maturity and effectiveness of natural resource management groups	2005	SHC	Meta-analysis	EXCLUDED
Weston P ; Hong R ; Kabore C ; Kull CA ;	Farmer-Managed Natural Regeneration Enhances Rural Livelihoods in Dryland West Africa	2015	SHC	Study design	EXCLUDED
Weyerhaeuser Horst ; Wilkes Andreas ; Kahrl Fredrich ;	Local impacts and responses to regional forest conservation and rehabilitation programs in China’s northwest Yunnan province	2005	MCM	No comparisons	EXCLUDED
Wezel A ; Bender S ;	Plant species diversity of homegardens of Cuba and its significance for household food supply	2003	SHC	No outcome	EXCLUDED
Whiteman A ; Wickramasinghe A ; Pina L ;	Global trends in forest ownership, public income and expenditure on forestry and forestry employment	2015	SHC	No discrete population	EXCLUDED
Wickramasinghe A ;	Anthropogenic factors and forest management in Sri lanka	1997	SHC	No outcomes	EXCLUDED
Widayati Atiek ; Jones Samantha ; Carlisle Bruce ;	Accessibility Factors and Conservation Forest Designation Affecting Rattan Cane Harvesting in Lambusango Forest, Buton, Indonesia	2011	SHC	No outcomes	EXCLUDED
Wiggins Steve ; Marfo Kofi ; Anchirinah Vincent ;	Protecting the forest or the people? Environmental policies and livelihoods in the forest margins of Southern Ghana	2004	SHC	Qualitative data	EXCLUDED
Williams K J. H;	Public acceptance of plantation forestry: Implications for policy and practice in Australian rural landscape	2014	SHC	No comparisons	EXCLUDED
Williams Sophie J; Gibbons James M; Clubbe Colin ; Dibble Amanda ; Marroquin Adolfo ; Jones Julia P G;	Who Harvests and Why? Characteristics of Guatemalan Households Harvesting Xat, (Chamaedorea ernesti-augusti)(1)	2012	SHC	No outcomes	EXCLUDED
Wilsey D S;	Reconnecting conservation & livelihood objectives through non-timber forest product certification	2006	SHC	No outcomes	EXCLUDED
Wilsey D S; Hildebrand P E;	Chamaedorea palm frond commercialization and certification considered from a smallholder livelihood system perspective	2011	SHC	Modeling	EXCLUDED
Woittiez Lotte S; Rufino Mariana C; Giller Ken E; Mapfumo Paul ;	The Use of Woodland Products to Cope with Climate Variability in Communal Areas in Zimbabwe	2013	SHC	No intervention	EXCLUDED
Woldeamanuel T ;	Gum and resin-producing species in the drylands of Ethiopia: productive bricolage footprints on the landscape	2012	SHC	No comparisons	EXCLUDED
Wollenberg E K;	Incentives for collecting gaharu (fungal-infected wood of Aquilaria spp.; Thymelaeaceae) in East Kalimantan	2001	SHC	No comparisons	EXCLUDED
Wood SLR ; Rhemtulla JM ; Coomes OT ;	Intensification of tropical fallow-based agriculture: Trading-off ecosystem services for economic gain in shifting cultivation landscapes?	2016	SHC	No comparisons, no outcomes	EXCLUDED
Woodhouse E ; McGowan P ; Milner-Gulland EJ ;	Fungal gold and firewood on the Tibetan plateau: examining access to diverse ecosystem provisioning services within a rural community	2014	SHC	No intervention	EXCLUDED
Woollen E ; Ryan C M; Baumert S ; Vollmer F ; Grundy I ; Fisher J ; Fernando J ; Luz A ; Ribeiro N ; Lisboa S N;	Charcoal production in the mopane woodlands of Mozambique: what are the trade-offs with other ecosystem services?	2016	SHC	No outcomes	EXCLUDED
Worku A ; Lemenih M ; Fetene M ; Teketay D ;	Socio-economic importance of gum and resin resources in the dry woodlands of Borana, southern Ethiopia	2011	SHC	Daily use	EXCLUDED
Worku A ; Pretzsch J ; Kassa H ; Auch E ;	The significance of dry forest income for livelihood resilience: The case of the pastoralists and agro-pastoralists in the drylands of southeastern Ethiopia	2014	SHC	No intervention	EXCLUDED
Wright Juliet H; Priston Nancy E C;	Hunting and trapping in Lebialem division, Cameroon: Bushmeat harvesting practices and human reliance	2010	SHC	No comparisons	EXCLUDED
Wrobel-Tobiszewska A ; Boersma M ; Sargison J ; Adams P ; Jarick S ;	An economic analysis of biochar production using residues from Eucalypt plantations	2015	SHC	No outcomes	EXCLUDED
Wunder S ;	Poverty alleviation and tropical forests - What scope for synergies?	2001	SHC	Study design	EXCLUDED
Wunder Sven ;	Ecotourism and economic incentives — an empirical approach	2000	MCM	No comparisons	EXCLUDED
Wunder Sven ;	Are direct payments for environmental services spelling doom for sustainable forest management in the tropics?	2006	SHC	Study design	EXCLUDED
Wunder Sven ;	The efficiency of payments for environmental services in tropical conservation	2007	SHC	No outcome	EXCLUDED
Wunder Sven ; Engel Stefanie ; Pagiola Stefano ;	Taking stock: A comparative analysis of payments for environmental services programs in developed and developing countries	2008	SHC	No comparision	EXCLUDED
Wyatt S ; Rousseau M H; Nadeau S ; Thiffault N ; Guay L ;	Social concerns, risk and the acceptability of forest vegetation management alternatives: insights for managers	2011	SHC	No outcome	EXCLUDED
Wysocka-Fijorek Emilia ;	Conception of Management of Private Forests in Poland	2009	SHC	No outcome	EXCLUDED
Xie Y ; Gong PC ; Han X ; Wen Y ;	The effect of collective forestland tenure reform in China: Does land parcelization reduce forest management intensity?	2014	SHC	No outcome	EXCLUDED
Xie Y ; Wen Y ; Zhang Y ; Li X ;	Impact of property rights reform on household forest management investment: An empirical study of southern China	2013	SHC	No outcome	EXCLUDED
Xu J ; Ribot J C;	Decentralisation and accountability in forest management: A case from Yunnan, Southwest China	2004	SHC	NO ACCESS	NO ACCESS
Xu Jintao ; Berck Peter ; Yi Yuanyuan ; Köhlin Gunnar ;	Property rights, tenure security and forest investment incentives: evidence from China's Collective Forest Tenure Reform	2014	SHC	No comparisons	EXCLUDED
Yadav BD ; Bigsby H ; MacDonald I ;	How can poor and disadvantaged households get an opportunity to become a leader in community forestry in Nepal?	2015	SHC	Study design	EXCLUDED
Yadav BD ; Bigsby H ; MacDonald I ;	The relative distribution: An alternative approach to evaluate the impact of community level forestry organisations on households	2015	SHC	Study design	EXCLUDED
Yadav Rajesh ; Yadav Nita ; Kharya Murlidhar ;	Traditional herbal remedies for health care: a review	2014	SHC	NO ACCESS	NO ACCESS
Yamada K ; Yanagisawa M ; Kono Y ; Nawata E ;	Use of natural biological resources and their roles in household food security in Northwest Laos	2004	SHC	No comparisons	EXCLUDED
Yang Wu ;	Ecosystem services, human well-being, and policies in couple human and natural systems	2013	MCM	THESIS	EXCLUDED
Yang Xuefei ; Wilkes Andreas ; Yang Yongping ; Xu Jianchu ; Geslani Cheryl S; Yang Xueqing ; Gao Feng ; Yang Jiankun ; Robinson Brian ;	Common and Privatized: Conditions for Wise Management of Matsutake Mushrooms in Northwest Yunnan Province, China	2009	SHC	Adoption of methods	EXCLUDED
Yasuda A ;	The Impacts of Sport Hunting on the Livelihoods of Local People: A Case Study of B{é}nou{é} National Park, Cameroon	2011	SHC	No intervention	EXCLUDED
Ye Y Q; Chen G J; Hong F ;	Impacts of the ``Grain for Green{''} project on rural communities in the Upper Min River Basin, Sichuan, China	2003	SHC	Study design	EXCLUDED
Yeo-Chang Y ;	Use of forest resources, traditional forest-related knowledge and livelihood of forest dependent communities: Cases in South Korea	2009	SHC	No intervention	EXCLUDED
Yi-fong Chen ;	The indigenous ecotourism and social development in Taroko National Park area and San-Chan tribe, Taiwan	2010	MCM	Qualitative data	EXCLUDED
Yin Y ; Xu W ; Zhou S ;	Linking carbon sequestration science with local sustainability: An integrated assessment approach	2007	SHC	No outcomes	EXCLUDED
Ying Zhang ; Irland Lloyd ; Zhou Xiaohong ; Song Yajie ; Wen Yali ; Liu Junchang ; Song Weimin ; Qiu Yang ;	Plantation development: Economic analysis of forest management in Fujian Province, China	2010	SHC	No outcomes	EXCLUDED
Yokota Y ; Harada K ; Rohman ; Silvi NO ; Wiyono ; Tanaka M ; Inoue M ;	Contributions of Company-Community Forestry Partnerships (PHBM) to the Livelihoods of Participants in Java, Indonesia: A Case Study in Madiun, East Java	2014	SHC	No comparisons	EXCLUDED
Yonariza ; Webb E L;	Rural household participation in illegal timber felling in a protected area of West Sumatra, Indonesia	2007	SHC	No outcomes	EXCLUDED
Yotapakdee T ; Kongsuban N ; Lattirasuvan T ; Mangkita W ;	Determinants of food bank from Melientha suavis Pierre in a rural community in Phrae Province, Thailand	2015	SHC	No comparisons	EXCLUDED
Youn Yeo-Chang ;	Use of forest resources, traditional forest-related knowledge and livelihood of forest dependent communities: Cases in South Korea	2009	SHC	No comparisons	EXCLUDED
Zang LZ ; Zhang CH ; Xu DY ; Xu ZC ;	Analysis on the Spatial Distribution and Evolutionary Trends of Farmers' Forestry Income in China	2015	SHC	Study design	EXCLUDED
Zbinden Simon ; Lee David R;	Paying for Environmental Services: An analysis of participation in Costa Rica's PSA program	2005	SHC	No comparison	EXCLUDED
Zeidemann V ; Kainer KA ; Staudhammer CL ;	Heterogeneity in NTFP quality, access and management shape benefit distribution in an Amazonian extractive reserve	2014	SHC	No outcome	EXCLUDED
Zenteno M ; de Jong W ; Boot R ; Zuidema PA ;	Learning from the past: Trends and dynamics in livelihoods of Bolivian forest communities	2014	SHC	No intervention	EXCLUDED
Zenteno M ; Zuidema P A; de Jong ; W ; Boot R G. A;	Livelihood strategies and forest dependence: New insights from Bolivian forest communities	2013	SHC	No intervention	EXCLUDED
Zhang D W; Pearse P H;	Differences in silvicultural investment under various types of forest tenure in British Columbia	1996	SHC	No outcomes	EXCLUDED
Zhao Xiaoqing ; Lv Xing ; Dai Jinhua ;	Impact assessment of the ``Grain for Green Project{''} and discussion on the development models in the mountain-gorge regions	2010	SHC	CANNOT LOCATE	CANNOT LOCATE
Zulu L ;	Bringing people back into protected forests in developing countries: Insights from co-management in Malawi	2013	SHC	Narrative case study	EXCLUDED
Zulu L C; Richardson R B;	Charcoal, livelihoods, and poverty reduction: Evidence from sub-Saharan Africa	2013	SHC	REVIEW	EXCLUDED
	Cost-benefit analysis	1994	SHC	CANNOT LOCATE	CANNOT LOCATE
	Forestry and food security	1989	SHC	CANNOT LOCATE	CANNOT LOCATE
	"Economic science for rural development: resources and education". Proceedings of the International Scientific Conference, Jelgava, Latvia, 28-29 April 2011	2011	SHC	PROCEEDINGS	EXCLUDED
	Current issues in non-timber forest products research. Proceedings of the workshop "Research on NTFP", Hot Springs, Zimbabwe, 28 August-2 September 1995	1996	SHC	Book	EXCLUDED
	Forests and trees outside forests are essential for global food security and nutrition	2013	SHC	Study design	EXCLUDED
	People and environment in Africa	1995	SHC	Book	EXCLUDED
	The hidden harvest: wild foods and agricultural systems. A literature review and annotated bibliography	1992	SHC	Book	EXCLUDED

## Sheet: Included
Authors	Title	Year	Done?	Who?	When?	Final verdict	Reason	Extracted	Included from McKinnon et al. Map
Adhikari J ; Ojha H ; Bhattarai B ;	Edible forest? Rethinking Nepal's forest governance in the era of food insecurity	2016	Y	PR	2017-02-12	Y		YES
Adhikari S ; Kingi T ; Ganesh S ;	Incentives and Community Participation in the Governance of Community Forests in Nepal	2016	Y	PR	2017-02-12	Y		YES
Agrawal A ; Chhatre A ; Gerber ER ;	Motivational Crowding in Sustainable Development Interventions	2015	Y	PR	2017-02-12	Y		YES
Agustsson K ; Garibjana A ; Rojas E ; Vatn A ;	An assessment of the Forest Allowance Programme in the Juma Sustainable Development Reserve in Brazil	2014	Y	PR	2017-02-13	Y		YES
Akhter S ; Sohel Md S. I; Rana Md P; Alamgir M ;	Impact of forest and non-forest villagers on Ukhia and Inani forest range under Cox's bazar (south) forest division, Bangladesh	2009	Y	PR	2017-02-16	Y		YES
Ambrose-Oji B ; Lawrence A ; Stewart A ;	Community based forest enterprises in Britain: Two organising typologies	2015	Y	PR	2017-02-16	Y		YES
Ameha A ; Nielsen O J; Larsen H O;	Impacts of access and benefit sharing on livelihoods and forest: Case of participatory forest management in Ethiopia	2014	Y	PR, SHC, KM	2017-02-16	Y		YES
Ali Tanvir ; Ahmad Munir ; Shahbaz Babar ; Suleri Abid ;	Impact of participatory forest management on vulnerability and livelihood assets of forest-dependent communities in northern Pakistan	2007	Y	SHC	2017-03-03	Y		YES
Ali Tanvir ; Ahmad Munir ; Shahbaz Babar ; Suleri Abid ;	Impact of participatory forest management on financial assets of rural communities in Northwest Pakistan	2007	Y	SHC	2017-03-04	Y		YES
Agarwal Bina ;	Does Women's Proportional Strength Affect their Participation? Governing Local Forests in South Asia	2010	Y	KM, SHC	2017-04-22	Y		YES
Abtew AA ; Pretzsch J ; Secco L ; Mohamod TE ;	Contribution of Small-Scale Gum and Resin Commercialization to Local Livelihood and Rural Economic Development in the Drylands of Eastern Africa	2014	Y	PR, KM, SHC	2017-05-02	Y		YES
Adhikari B ; Di Falco ; S ; Lovett J C;	Household characteristics and forest dependency: evidence from common property forest management in Nepal	2004	Y	KM, SHC	2017-05-03	Y		YES
Adhikari B ; Lovett J C;	Transaction costs and community-based natural resource management in Nepal	2006	Y	KM, SHC	2017-05-03	Y		YES
Adhikari H ;	Poverty, property rights and collective action: understanding the distributive aspects of common property resource management	2005	Y	KM, SHC	2017-05-03	Y		YES
Ahenkan Albert ; Boon Emmanuel ;	Improving Nutrition and Health through Non-timber Forest Products in Ghana	2011	Y	KM	2017-05-07	Y		YES
Alix-garcia Jennifer ;	Environmental and Socioeconomic Impacts of Mexico ' s Payments for Ecosystem Services Program Grantee Final Report	2014	Y	KM	2017-05-07	Y		YES
Arriagada Rodrigo A; Sills Erin O; Pattanayak Subhrendu K; Ferraro Paul J;	Combining Qualitative and Quantitative Methods to Evaluate Participation in Costa Rica's Program of Payments for Environmental Services	2009	Y	KM	2017-05-07	Y		YES
Arriagada RA ; Sills EO ; Ferraro PJ ; Pattanayak SK ;	Do Payments Pay Off? Evidence from Participation in Costa Rica's PES Program	2015	Y	KM	2017-05-08	Y		YES
Atela Joanes O; Minang Peter A; Quinn Claire H; Duguma Lalisa A;	Implementing REDD+ at the local level: Assessing the key enablers for credible mitigation and sustainable livelihood outcomes	2015	Y	KM	2017-05-09	Y		YES
Bandyopadhyay Sushenjit ; Humavindu Michael ; Shyamsundar Priya ; Wang Limin ;	Benefits to local communities from community conservancies in Namibia: an assessment	2009	Y	KM	2017-05-09	Y		YES
Barbier Edward B;	In the wake of tsunami: Lessons learned from the household decision to replant mangroves in Thailand	2008	Y	KM	2017-05-09	Y		YES
Barli Onder ; Baskent Emin Zeki; Turker Mustafa Fehmi; Gedik Tarik ;	Analytical approach for analyzing and providing solutions for the conflicts among forest stakeholders across Turkey	2006	Y	KM	2017-05-09	Y		YES
Gobeze T ; Bekele M ; Lemenih M ; Kassa H ;	Participatory forest management and its impacts on livelihoods and forest status: The case of bonga forest in Ethiopia	2009	Y	KM	2017-05-10	Y		YES
Hegde R ; Bull GQ ; Wunder S ; Kozak RA ;	Household participation in a Payments for Environmental Services programme: the Nhambita Forest Carbon Project (Mozambique)	2015	Y	KM	2017-05-11	Y		YES
Jagger P ;	Forest incomes after Uganda's forest sector reform. Are the rural poor gaining?	2008	Y	KM	2017-05-14	Y		YES
Jumbe C ; Angelsen A ;	Has forest co-management in Malawi benefited the poor?	2006	Y	KM	2017-05-14	Y		YES
Khatri-Chhetri A	Local Institutions and Forest Products Extraction: Evidence from Forest Management in Nepal	2006	Y	KM	2017-05-14	Y		YES
Ly N	Evaluating the Pilot Implementation of Payment for Forest Environmental Services in Lam Dong, Vietnam	2013	Y	KM	2017-05-14	Y		YES
Oyono P R; Biyong M B; Samba S K;	Beyond the decade of policy and community euphoria: The state of livelihoods under new local rights to forest in rural Cameroon	2012	Y	KM	2017-05-21	Y		YES
Osorio C	The effects of markets on the use of forest for the livelihood of indigenous households in the Colombian Amazon	2009	Y	KM	2017-05-22	Y		YES
Persha L, Meshack C	A triple win? The impact of Tanzania’s Joint Forest Management programme on livelihoods, governance and forests	2016	Y	KM	2017-05-22	Y		YES
Rahut DB ; Ali A ; Behera B ;	Household participation and effects of community forest management on income and poverty levels: Empirical evidence from Bhutan	2015	Y	KM	2017-05-22	Y		YES
Rist L ; Shanley P ; Sunderland T ; Sheil D ; Ndoye O ; Liswanti N ; Tieguhong J ;	The impacts of selective logging on non-timber forest products of livelihood importance	2012	Y	KM	2017-05-22	Y		YES
Sims K, Alix-Garcia J	Parks versus PES: Evaluating direct and incentive-based land conservation in Mexico	2016	Y	KM	2017-05-22	Y		YES
Sreedharan CK, Matta J	Poverty alleviation as a pathway to sustainable forest management	2010	Y	KM	2017-05-22	Y		YES
Yemiru T ; Roos A ; Campbell B M; Bohlin F ;	Forest incomes and poverty alleviation under participatory forest management in the bale highlands, Southern Ethiopia	2010	Y	KM	2017-05-22	Y		YES
Jumbe Charles Blessings Laurence; Angelsen Arild ;	Do the Poor Benefit from Devolution Policies? Evidence from Malawi’s Forest Co-Management Program	2006	Y	KM	2017-05-23	Y		YES
Kaushal K K; Melkani V K; Kala J C;	Sustainable poverty alleviation through a forestry project in Tamilnadu State of India	2005	Y	KM	2017-05-23	Y		YES
Mullan Katrina ; Kontoleon Andreas ; Swanson Timothy M; Zhang Shiqiu ;	Evaluation of the Impact of the Natural Forest Protection Program on Rural Household Livelihoods	2010	Y	KM	2017-05-23	Y		YES
Agrawal A ; Gupta K ;	Decentralization and participation: The governance of common pool resources in Nepal's Terai	2005	Y	KM	2017-05-24	Y		YES
Amin VL ; Yok MCK ;	Thematic Interpretation Approach in Environmental Adult Education	2015	Y	KM	2017-05-24	Y		YES
Bahuguna V K;	Forests in the economy of the rural poor: An estimation of the dependency level	2000	Y	KM	2017-05-24	Y		YES
Barbier E B;	Mangrove dependency and the livelihoods of coastal communities in Thailand	2006	Y	KM	2017-05-24	Y		YES
Lybbert Travis J; Aboudrare Abdellah ; Chaloud Deborah ; Magnan Nicholas ; Nash Maliha ;	Booming markets for Moroccan argan oil appear to benefit some rural households while threatening the endemic argan forest.	2011	Y	KM	2017-05-24	Y		YES
Muhammed N, Haque F, Koike M	THE ROLE OF PARTICIPATORY SOCIAL FORESTRY IN THE ENHANCEMENT OF THE SOCIO-ECONOMIC CONDITION OF THE RURAL POOR: A CASE STUDY OF DHAKA FOREST DIVISION IN BANGLADESH	2008	Y	KM	2017-05-24	Y		YES
Hickey G, Poulit M, Smith-Hall C, Wunder S, Nielsen M	Quantifying the economic contribution of wild food harvests to rural livelihoods: A global-comparative analysis	2016	Y	KM	2017-05-25	Y		YES
Thanichanon P, Schmidt-Vogt D, Messerli P, Heinimann A, Epprecht M	Secondary Forests and Local Livelihoods along a Gradient of Accessibility: A Case Study in Northern Laos	2013	Y	KM	2017-05-25	Y		YES
Beitl C M;	Cockles in custody: The role of common property arrangements in the ecological sustainability of mangrove fisheries on the Ecuadorian coast	2011	Y	MCM, SHC	2017-05-27	Y		YES
Biggs Duan ; Turpie Jane ; Fabricius Christo ; Spenceley Anna ;	The value of avitourism for conservation and job creation-An analysis from South Africa	2011	Y	JE, SHC	2017-05-27	Y		YES
Bista Sagun ; Webb Edward L;	Collection and marketing of non-timber forest products in the far western hills of Nepal	2006	Y	JE, SHC	2017-06-02	Y		YES
Debnath D ; Dasgupta S ;	Livelihood Generation and Poverty Reduction Attempts in Joint Forest Management Activities in Madhya Pradesh	2006	Y	JE, SHC	2017-06-04	Y		YES
Cao Shixiong ; Wang Xiuqing ; Song Yuezhen ; Chen Li ; Feng Qi ;	Impacts of the Natural Forest Conservation Program on the livelihoods of residents of Northwestern China: Perceptions of residents affected by the program	2010	Y	SHC	2017-06-09	Y		YES
Chen H Y; Zhu T ; Krott M ; Maddox D ;	Community forestry management and livelihood development in northwest China: integration of governance, project design, and community participation	2013	Y	SHC	2017-06-11	Y		YES
Chen Haiyun ; Zhu Ting ; Krott Max ; Calvo José F; Ganesh Shivakoti P; Makoto Inoue ;	Measurement and evaluation of livelihood assets in sustainable forest commons governance	2013	Y	MCM, SHC	2017-06-11	Y		YES
Chhetri Bir Bahadur Khanal; Larsen Helle Overgaard; Smith-Hall Carsten ;	Law Enforcement in Community Forestry: Consequences for the Poor	2012	Y	MCM, SHC	2017-06-11	Y		YES
Chowdhury Mohammad Shaheed Hossain; Koike Masao ; Rana Parvez ; Muhammed Nur ;	Community development through collaborative management of protected areas: evidence from Bangladesh with a case of Rema-Kalenga Wildlife Sanctuary	2013	Y	SHC	2017-06-11	Y		YES
Clements Tom ; John Ashish ; Nielsen Karen ; An Dara ; Tan Setha ; Milner-Gulland E J;	Payments for biodiversity conservation in the context of weak institutions: Comparison of three programs from Cambodia	2010	Y	SHC, KM	2017-06-14	Y		YES
Danesh Miah ; M ; Abubokor Siddik ; M ; Yong Shin ; M ;	Socio-economic and environmental impacts of casuarina shelterbelt in the Chittagong coast of Bangladesh	2013	Y	SHC	2017-06-14	Y		YES
Das N ;	Impact of Participatory Forestry Program on Sustainable Rural Livelihoods: Lessons From an Indian Province	2012	Y	MCM, SHC	2017-06-17	Y		YES
Das Nimai ; Sarker Debnarayan ;	Impact of a Moral Hazard Problem in the Joint Forest Management Programme: A Study from Forest-Dependent Households in West Bengal	2009	Y	MCM	2017-06-17	Y		YES
Datta D ; Chatterjee D ;	Assessment of community-based initiatives in sustainable management of Indian dry deciduous forests	2012	Y	MCM	2017-06-17	Y		YES
Dolisca Frito ; McDaniel Josh M; Teeter Lawrence D;	Farmers' perceptions towards forests: A case study from Haiti	2007	Y	MCM	2017-06-17	Y		YES
Dongol Chandra Man; Hughey Kenneth F D; Bigsby Hugh R;	Capital formation and sustainable community forestry in Nepal	2002	Y	SHC	2017-06-17	Y		YES
Duchelle A E; Kainer K A; Wadt L H. O;	Is Certification Associated with Better Forest Management and Socioeconomic Benefits? A Comparative Analysis of Three Certification Schemes Applied to Brazil Nuts in Western Amazonia	2013	Y	MCM, SHC	2017-06-17	Y		YES
Ferraro Paul J; Hanauer Merlin M;	Protecting Ecosystems and Alleviating Poverty with Parks and Reserves: ‘Win-Win’ or Tradeoffs?	2011	Y	MCM	2017-06-18	Y		YES
Ferraro Paul J; Hanauer Merlin M; Miteva Daniela A; Nelson Joanna L; Pattanayak Subhrendu K; Nolte Christoph ; Sims Katharine R E;	Estimating the impacts of conservation on ecosystem services and poverty by integrating modeling and evaluation	2015	Y	MCM	2017-06-18	Y		YES
Ferraro Paul J; Hanauer Merlin M; Sims Katharine R E;	Conditions associated with protected area success in conservation and poverty reduction	2011	Y	MCM	2017-06-18	Y		YES
Fujita Y ; Phanvilay K ;	Land and Forest Allocation in Lao People's Democratic Republic: Comparison of Case Studies from Community-Based Natural Resource Management Research	2008	Y	MCM	2017-06-18	Y		YES
Gauli Kalyan ; Hauser Michael ;	Pro-poor Commercial Management of Non-timber Forest Products in Nepal's Community Forest User Groups: Factors for Success	2009	Y	MCM	2017-06-18	Y		YES
Ghorbani Abdolbaset ; Langenberger Gerhard ; Liu Jing Xin; Wehner Stefanie ; Sauerborn Joachim ;	Diversity of Medicinal and Food Plants as Non-timber Forest Products in Naban River Watershed National Nature Reserve (China): Implications for Livelihood Improvement and Biodiversity Conservation	2012	Y	MCM	2017-06-19	Y		YES
Gordon I ; Ayiemba W ;	Harnessing Butterfly Biodiversity for Improving Livelihoods and Forest Conservation: The Kipepeo Project	2003	Y	MCM	2017-06-19	Y		YES
Buchenrieder Gertrud ; Balgah Roland Azibo;	Sustaining livelihoods around community forests. What is the potential contribution of wildlife domestication?	2013	Y	SHC	2017-06-20	Y		YES
Gurung Anup ; Bista Rajesh ; Karki Rahul ; Shrestha Shanti ; Uprety Dharam ; Oh Sang-Eun ;	Community-based forest management and its role in improving forest conditions in Nepal	2012	Y	JE	2017-06-20	Y		YES
Gurung Dhan Bahadur; Seeland Klaus ;	Ecotourism benefits and livelihood improvement for sustainable development in the nature conservation areas of Bhutan	2011	Y	SHC	2017-06-20	Y		YES
Ha T T. P; van Dijk ; H ; Visser L ;	Impacts of changes in mangrove forest management practices on forest accessibility and livelihood: A case study in mangrove-shrimp farming system in Ca Mau Province, Mekong Delta, Vietnam	2014	Y	SHC	2017-06-20	Y		YES
Buffum B ; Lawrence A ; Temphel K J;	Equity in Community Forests in Bhutan	2010	Y	SHC	2017-06-21	Y		YES
Bukenya M ; Johnsen F H; William S G. S;	Environmental and exchange entitlements from eucalyptus woodlots: The case of mukono district in uganda	2009	Y	SHC	2017-06-21	Y		YES
Campos Pablo ; Daly-Hassen Harned ; Oviedo Jose L; Ovando Paola ; Chebil Ali ;	Accounting for single and aggregated forest incomes: Application to public cork oak forests in Jerez (Spain) and Iteimia (Tunisia)	2008	Y	SHC	2017-06-21	Y		YES
Cao S ; Zhong B ; Yue H ; Zeng H ; Zeng J ;	Development and testing of a sustainable environmental restoration policy on eradicating the poverty trap in China's Changting County	2009	Y	SHC	2017-06-21	Y		YES
Chand N ; Kerr GN ; Bigsby H ;	Production efficiency of community forest management in Nepal	2015	Y	SHC	2017-06-21	Y		YES
Motiur R M; Furukawa Y ; Kawata I ; Rahman M M; Alam M ;	Role of homestead forests in household economy and factors affecting forest production: A case study in southwest Bangladesh	2006	Y	JE	2017-06-26	Y		YES
Mukul Sharif Ahmed; Rashid A Z M Manzoor; Quazi Shimona A; Uddin Mohammed Belal; Fox Jefferson ;	Local peoples' responses to co-management regime in protected areas: A case study from Satchari National Park, Bangladesh	2012	Y	MCM	2017-06-26	Y		YES
Nath T K; Inoue M ;	Forest-based settlement project and its impacts on community livelihood in the Chittagong Hill Tracts, Bangladesh	2009	Y	MCM	2017-06-26	Y		YES
Nath T K; Inoue M ;	The upland settlement project of Bangladesh as a means of reducing land degradation and improving rural livelihoods	2008	Y	SHC	2017-06-26	Y		YES
Das Nimai ;	Incidence of forest income on reduction of inequality: Evidence from forest dependent households in milieu of joint forest management	2010	Y	SHC	2017-06-28	Y		YES
Dhakal M ; Masuda M ;	Local pricing system of forest products and its relations to equitable benefit sharing and livelihood improvement in the lowland community forestry program in Nepal	2009	Y	SHC	2017-06-28	Y		YES
Ha T T. T; van Dijk ; H ; Bush S R;	Mangrove conservation or shrimp farmer's livelihood? The devolution of forest management and benefit sharing in the Mekong Delta, Vietnam	2012	Y	MCM	2017-06-28	Y		YES
Haglund E ; Ndjeunga J ; Snook L ; Pasternak D ;	Dry land tree management for improved household livelihoods: Farmer managed natural regeneration in Niger	2011	Y	MCM	2017-06-28	Y		YES
Harada K ; Wiyono ;	Certification of a Community-based Forest Enterprise for Improving Institutional Management and Household Income: A Case from Southeast Sulawesi, Indonesia	2013	Y	MCM	2017-06-28	Y		YES
Naughton-Treves Lisa ; Alix-Garcia Jennifer ; Chapman Colin A;	Lessons about parks and poverty from a decade of forest loss and economic growth around Kibale National Park, Uganda	2011	Y	MCM	2017-06-28	Y		YES
Niesenbaum Richard A; Salazar Mauro E; Diop Amadou M;	Community Forestry in the Mayan Biosphere Reserve in Guatemala	2005	Y	MCM	2017-06-28	Y		YES
Ogar Ashibel M; Enete Anselm A;	Performance of forest management committees in Cross River state, Nigeria	2010	Y	SHC	2017-06-28	Y		YES
Pinyopusarerk Khongsak ; Tran Thi Thu Ha; Tran Van Dien;	Making community forest management work in northern Vietnam by pioneering participatory action	2014	Y	MCM	2017-06-28	Y		YES
Rasul Golam ; Choudhary Dyutiman ; Pandit Bishnu Hari; Kollmair Michael ;	Poverty and Livelihood Impacts of a Medicinal and Aromatic Plants Project in India and Nepal: An Assessment	2012	Y	MCM	2017-06-28	Y		YES
Rizek Maytê Benicio; Morsello Carla ;	Impacts of Trade in Non-timber Forest Products on Cooperation among Caboclo Households of the Brazilian Amazon	2012	Y	SHC	2017-06-28	Y		YES
Sanginga P C; Abenakyo A ; Kamugisha R ; Martin A M; Muzira R ;	Tracking Outcomes of Social Capital and Institutional Innovations in Natural Resources Management: Methodological Issues and Empirical Evidence From Participatory Bylaw Reform in Uganda	2010	Y	MCM	2017-06-28	Y		YES
Hogarth N J;	The link between smallholder bamboo shoot management, income, and livelihoods: A case study in southern China	2013	Y	SHC	2017-06-29	Y		YES
Huang Lin ; Shao Quanqin ; Liu Jiyuan ;	Forest restoration to achieve both ecological and economic progress, Poyang Lake basin, China	2012	Y	SHC	2017-06-29	Y		YES
Islam K K; Sato N ;	Protected Sal Forest and Livelihoods of Ethnic Minorities: Experience From Bangladesh	2013	Y	MCM	2017-07-01	Y		YES
Islam Kk ; Sato N ;	Participatory forestry in Bangladesh: has it helped to increase the livelihoods of Sal forests-dependent people?	2012	Y	SHC	2017-07-01	Y		YES
Ite Uwem ; Adams William ;	Expectations, impacts and attitudes: conservation and development in Cross River National Park, Nigeria	2000	Y	SHC	2017-07-01	Y		YES
Kabubo-Mariara J ;	Forest-poverty nexus: Exploring the contribution of forests to rural livelihoods in Kenya	2013	Y	MCM	2017-07-02	Y		YES
Karki Shova T;	Do protected areas and conservation incentives contribute to sustainable livelihoods? A case study of Bardia National Park, Nepal	2013	Y	SHC	2017-07-02	Y		YES
Kibria A S. Md G; Jashimuddin M ; Makoto I ;	Effects of participatory forest management on livelihood capitals of the community in Cox's Bazar, Bangladesh	2013	Y	SHC	2017-07-02	Y		YES
Köhlin Gunnar ; Amacher Gregory S;	Welfare Implications of Community Forest Plantations in Developing Countries: The Orissa Social Forestry Project	2005	Y	MCM	2017-07-02	Y		YES
Korhonen Kaisa ; Rahkonen Ossi ; Hemminki 1 ; Elina ;	Implications of integrated nature conservation for human reproductive health: a case study from Ranomafana National Park, Madagascar	2004	Y	MCM	2017-07-02	Y		YES
Kumar Sanjay ;	Does “Participation” in Common Pool Resource Management Help the Poor? A Social Cost–Benefit Analysis of Joint Forest Management in Jharkhand, India	2002	Y	MCM	2017-07-03	Y		YES
Lambini C K; Nguyen T T;	A comparative analysis of the effects of institutional property rights on forest livelihoods and forest conditions: Evidence from Ghana and Vietnam	2014	Y	MCM	2017-07-03	Y		YES
Le H D; Smith C ; Herbohn J ;	What drives the success of reforestation projects in tropical developing countries? The case of the Philippines	2013	Y	MCM	2017-07-03	Y		YES
Lewark S ; George L ; Karmann M ;	Study of gender equality in community based forest certification programmes in Nepal	2011	Y	MCM	2017-07-04	Y		YES
Li J ; Feldman M W; Li S ; Daily G C;	Rural household income and inequality under the Sloping Land Conversion Program in western China	2011	Y	SHC	2017-07-04	Y		YES
Liang Yicheng ; Li Shuzhuo ; Feldman Marcus W; Daily Gretchen C;	Does household composition matter? The impact of the Grain for Green Program on rural livelihoods in China	2012	Y	MCM	2017-07-05	Y		YES
Liu Can ; Lu Jinzhi ; Yin Runsheng ;	An Estimation of the Effects of China’s Priority Forestry Programs on Farmers’ Income	2010	Y	MCM	2017-07-05	Y		YES
Lund Jens Friis; Baral Keshab ; Bhandari Nirmala Singh; Chhetri Bir Bahadur Khanal; Larsen Helle Overgaard; Nielsen Oystein Juul; Puri Lila ; Rutt Rebecca Leigh; Treue Thorsten ;	Who benefits from taxation of forest products in Nepal's community forests?	2014	Y	JE	2017-07-06	Y		YES
Lund Jens Friis; Treue Thorsten ;	Are We Getting There? Evidence of Decentralized Forest Management from the Tanzanian Miombo Woodlands	2008	Y	SHC	2017-07-07	Y		YES
Mahapatra A K; Shackleton C M;	Exploring the relationships between trade in natural products, cash income and livelihoods in tropical forest regions of Eastern India	2012	Y	SHC	2017-07-07	Y		YES
Maharjan M R; Dakal T Ram; Thapa Suresh K; Schreckenberg K ; Luttrell C ;	Improving the benefits to the poor from community forestry in the Churia region of Nepal	2009	Y	MCM	2017-07-07	Y		YES
Martini Endri ; Roshetko James M; van Noordwijk ; Meine ; Rahmanulloh Arif ; Mulyoutami Elok ; Joshi Laxman ; Budidarsono Suseno ;	Sugar palm (Arenga pinnata (Wurmb) Merr.) for livelihoods and biodiversity conservation in the orangutan habitat of Batang Toru, North Sumatra, Indonesia: Mixed prospects for domestication	2012	Y	SHC	2017-07-07	Y		YES
Maskey Vishakha ; Gebremedhin Tesfa G; Dalton Timothy J;	Social and cultural determinants of collective management of community forest in Nepal	2006	Y	SHC	2017-07-11	Y		YES
Matiku P a; Caleb M b; Callistus O b;	The impact of participatory forest management on local community livelihoods in the Arabuko-Sokoke forest, Kenya	2013	Y	MCM	2017-07-11	Y		YES
McDougall Cynthia ; Jiggins Janice ; Pandit Bishnu Hari; Rana Sushila K Thapa Magar; Leeuwis Cees ;	Does Adaptive Collaborative Forest Governance Affect Poverty? Participatory Action Research in Nepal's Community Forests	2013	Y	SHC	2017-07-11	Y		YES
Meshack Charles K; Ahdikari Bhim ; Doggart Nike ; Lovett Jon C;	Transaction costs of community-based forest management: empirical evidence from Tanzania	2006	Y	MCM	2017-07-11	Y		YES
Miah Md D; Ahmed F U;	Conservation of a Tropical Wet Semi-evergreen Forest Ecosystem by an Indigenous Community in the Bandarban Hill District of Bangladesh: The Role of Intervention	2013	Y	MCM	2017-07-11	Y		YES
Mohammed A J; Inoue M ;	Drawbacks of decentralized natural resource management: Experience from Chilimo Participatory Forest Management project, Ethiopia	2012	Y	MCM	2017-07-11	Y		YES
Mohammed Abrar Juhar; Inoue Makoto ;	Forest-dependent communities' livelihood in decentralized forest governance policy epoch: case study from West Shoa zone, Ethiopia	2013	Y	MCM	2017-07-11	Y		YES
Shoo Rehema Abeli; Songorwa Alexander N;	Contribution of eco-tourism to nature conservation and improvement of livelihoods around Amani nature reserve, Tanzania	2013	Y	SHC	2017-07-11	Y		YES
Sikor Thomas ; Nguyen Tan Quang;	Why May Forest Devolution Not Benefit the Rural Poor? Forest Entitlements in Vietnam’s Central Highlands	2007	Y	SHC	2017-07-11	Y		YES
Sills Erin ; Saha Shubhayu ;	Subsidies for Rubber: Conserving Rainforests While Sustaining Livelihoods in the Amazon?	2010	Y	SHC	2017-07-11	Y		YES
Spiteri Arian ; Nepal Sanjay K;	Distributing conservation incentives in the buffer zone of Chitwan National Park, Nepal	2008	Y	MCM	2017-07-12	Y		YES
Suparat Benjawan ; Singseewo Adisak ; Pinyoanuntapong Boonchird ; Thamaseananupap Penkair ;	A Study and Development on Knowledge, Attitude and Practice in Forest Conservation and Reforestration of Youth in Ban Khoa Phra Community, Nakhon Nayok Province	2010	Y	SHC	2017-07-13	Y		YES
Thoms Christopher A;	Community control of resources and the challenge of improving local livelihoods: A critical examination of community forestry in Nepal	2008	Y	SHC	2017-07-13	Y		YES
Ting Zhu ; Shivakoti Ganesh P; Haiyun Chen ; Maddox David ;	A survey-based evaluation of community-based co-management of forest resources: A case study of Baishuijiang National Natural Reserve in China	2012	Y	SHC	2017-07-13	Y		YES
Toillier Aurélie ; Serpantié Georges ; Hervé Dominique ; Lardon Sylvie ;	Livelihood Strategies and Land Use Changes in Response to Conservation: Pitfalls of Community-Based Forest Management in Madagascar	2011	Y	SHC	2017-07-13	Y		YES
Xu Jianying ; Lü Yihe ; Chen Liding ; Liu Yang ;	Contribution of tourism development to protected area management: local stakeholder perspectives	2009	Y	SHC	2017-07-13	Y		YES
Yuan Jiangqiong ; Dai Limin ; Wang Qingli ;	State-led ecotourism development and nature conservation: A case study of the Changbai Mountain Biosphere Reserve, China	2008	Y	MCM	2017-07-13	Y		YES
Zambrano Angelica M. Almeyda; Broadbent Eben N; Durham William H;	Social and environmental effects of ecotourism in the Osa Peninsula of Costa Rica: the Lapa Rios case	2010	Y	SHC	2017-07-13	Y		YES
Fu Y N; Chen J ; Guo H J; Hu H B; Chen A G; Cui J Y;	Rain forest dwellers' livelihoods: income generation, household wealth and NTFP sales, a case study from Xishuangbanna, SW China	2009	Y	SHC	2017-07-17	Y		YES
Fu Yongneng ; Chen Jin ; Guo Huijun ; Chen Aiguo ; Cui Jingyun ; Hu Huabin ;	The role of non-timber forest products during agroecosystem shift in Xishuangbanna, southwestern China	2009	Y	SHC	2017-07-17	Y		YES
Garcia-Amado L R; Perez M R; Dahringer G ; Escutia F R; Garcia S B; Mejia E C;	From wild harvesting to agroforest cultivation: A Chamaedorea palm case study from Chiapas, Mexico	2013	Y	SHC	2017-07-17	Y		YES
Garcia-Amado L R; Perez M R; Iniesta-Arandia I ; Dahringer G ; Reyes F ; Barrasa S ;	Building ties: social capital network analysis of a forest community in a biosphere reserve in Chiapas, Mexico	2012	Y	SHC	2017-07-17	Y		YES
Gauli K ; Hauser M ;	Commercial management of non-timber forest products in Nepal's community forest users groups: who benefits?	2011	Y	SHC	2017-07-17	Y		YES
Gbedomon RC ; Floquet A ; Mongbo R ; Salako VK ; Fandohan AB ; Assogbadjo AE ; Kakai RG ;	Socio-economic and ecological outcomes of community based forest management: A case study from Tobe-Kpobidon forest in Benin, Western Africa	2016	Y	SHC	2017-07-17	Y		YES
Gelo Dambala ; Koch Steven F;	Welfare and Common Property Rights Forestry : Evidence from Ethiopian Villages Welfare and Common Property Rights Forestry : Evidence from Ethiopian Villages ∗	2012	Y	SHC	2017-07-17	Y		YES
Gross-Camp Nicole D; Martin Adrian ; McGuire Shawn ; Kebede Bereket ; Munyarukaza Joseph ;	Payments for ecosystem services in an African protected area: exploring issues of legitimacy, fairness, equity and effectiveness	2012	Y	SHC	2017-07-17	Y		YES
Gelo D ; Muchapondwa E ; Koch SF ;	Decentralization, market integration and efficiency-equity trade-offs: Evidence from Joint Forest Management in Ethiopian villages	2016	Y	SHC	2017-07-18	Y		YES
Gelo Dambala ; Koch Steven F;	The Impact of Common Property Right Forestry: Evidence from Ethiopian Villages	2014	Y	SHC	2017-07-18	Y		YES
Harada K ; Prabowo D ; Aliadi A ; Ichihara J ; Ma HO ;	How Can Social Safeguards of REDD+ Function Effectively Conserve Forests and Improve Local Livelihoods? A Case from Meru Betiri National Park, East Java, Indonesia	2015	Y	SHC	2017-07-18	Y		YES
Hartter Joel ;	Resource Use and Ecosystem Services in a Forest Park Landscape	2010	Y	SHC	2017-07-18	Y		YES
Hashiguchi H ; Pulhin JM ; Dizon JT ; Camacho LD ;	Impacts of Community-Based Forest Management Policies Implemented by a Local Forest Institution: A Case Study from Bayombong, Nueva Vizcaya, Philippines	2016	Y	SHC	2017-07-18	Y		YES
Rodriguez L G; Perez M R; Yang X S; Geriletu ; Belcher B ; Zhou B Z; Li Z C;	Maintaining the contract responsibility system of forest land distribution in China: Evidence from a novel financial compensation scheme in Daxi Village of Anji County, Zhejiang	2013	Y	SHC	2017-07-18	Y		YES
Hayes T ; Murtinho F ; Wolff H ;	An institutional analysis of Payment for Environmental Services on collectively managed lands in Ecuador	2015	Y	SHC	2017-07-28	Y		YES
He Jun ; Zhou Zhimei ; Yang Huixian ; Xu Jianchu ;	Integrative Management of Commercialized Wild Mushroom: A Case Study of Thelephora ganbajun in Yunnan, Southwest China	2011	Y	SHC	2017-08-17	Y		YES
Jain S K; Singh P ;	Economic analysis of industrial agroforestry: poplar (Populus deltoides) in Uttar Pradesh (India)	2000	Y	SHC	2017-09-27	Y		YES
Jarzebski MP ; Tumilba V ; Yamamoto H ;	Application of a tri-capital community resilience framework for assessing the social-ecological system sustainability of community-based forest management in the Philippines	2016	Y	SHC	2017-09-27	Y		YES
Jindal Rohit ; Kerr John M; Carter Sarah ;	Reducing Poverty Through Carbon Forestry? Impacts of the N'hambita Community Carbon Project in Mozambique	2012	Y	SHC	2017-09-27	Y		YES
Chhetri Bir Bahadur Khanal; Lund Jens Friis; Nielsen Oystein Juul;	The public finance potential of community forestry in Nepal	2012	Y	SHC, KM	2017-09-28	Y		YES
Choocharoen C ; Schneider A ; Neef A ; Georgiadis P ;	Income Options for the Poorest of the Poor: The Case of Cardamom in Northern Laos	2013	Y	SHC, KM	2017-09-28	Y		YES
Choudhary Dyutiman ; Kala S P; Todaria N P; Rawat R B S; Kunwar M S; Kollmair M ;	Upgrading mountain people in medicinal and aromatic plants value chains: lessons for sustainable management and income generation from Uttarakhand, India	2013	Y	SHC, KM	2017-09-28	Y		YES
Hegde Ravi ; Bull Gary Q;	Performance of an agro-forestry based Payments-for-Environmental-Services project in Mozambique: A household level analysis	2011	Y	SHC	2017-09-28	Y		YES
Heubach Katja ; Wittig Rüdiger ; Nuppenau Ernst-August ; Hahn Karen ;	The economic importance of non-timber forest products (NTFPs) for livelihood maintenance of rural west African communities: A case study from northern Benin	2011	Y	SHC	2017-09-28	Y		YES
Hussain Syed Ainul; Badola Ruchi ;	Valuing mangrove benefits: contribution of mangrove forests to local livelihoods in Bhitarkanika Conservation Area, East Coast of India	2010	Y	SHC	2017-09-28	Y		YES
Jagger Pamela ; Shively Gerald ; Arinaitwe Arthur ;	Circular migration, small-scale logging, and household livelihoods in Uganda	2012	Y	SHC	2017-09-28	Y		YES
Jones Samantha ;	Tigers, trees and Tharu: An analysis of community forestry in the buffer zone of the Royal Chitwan National Park, Nepal	2007	Y	SHC	2017-09-28	Y		YES
Kalonga SK ; Kulindwa KA ; Mshale BI ;	Equity in Distribution of Proceeds from Forest Products from Certified Community-Based Forest Management in Kilwa District, Tanzania	2015	Y	SHC	2017-09-28	Y		YES
Kamanga Penjani ; Vedeld Paul ; Sjaastad Espen ;	Forest incomes and rural livelihoods in Chiradzulu District, Malawi	2009	Y	SHC	2017-09-28	Y		YES
Kar Shiba P; Jacobson Michael G;	NTFP income contribution to household economy and related socio-economic factors: Lessons from Bangladesh	2012	Y	SHC	2017-09-28	Y		YES
Khatun K ; Gross-Camp N ; Corbera E ; Martin A ; Ball S ; Massao G ;	When Participatory Forest Management makes money: insights from Tanzania on governance, benefit sharing, and implications for REDD	2015	Y	SHC	2017-09-28	Y		YES
Khundi F ; Jagger P ; Shively G ; Sserunkuuma D ;	Income, poverty and charcoal production in Uganda	2011	Y	SHC	2017-09-28	Y		YES
Krause Torsten ; Collen Wain ; Nicholas Kimberly A;	Evaluating Safeguards in a Conservation Incentive Program: Participation, Consent, and Benefit Sharing in Indigenous Communities of the Ecuadorian Amazon	2013	Y	SHC	2017-09-28	Y		YES
L'Roe Jessica ; Naughton-Treves Lisa ;	Effects of a Policy-Induced Income Shock on Forest-Dependent Households in the Peruvian Amazon	2014	Y	SHC	2017-09-28	Y		YES
Lescuyer Guillaume ;	Sustainable Forest Management at the Local Scale: A Comparative Analysis of Community Forests and Domestic Forests in Cameroon	2013	Y	SHC, KM	2017-09-28	Y		YES
Lescuyer Guillaume ; Mvondo Samuel Assembe; Essoungou Julienne Nadege; Toison Vincent ; Trebuchon Jean-Francois ; Fauvet Nicolas ;	Logging Concessions and Local Livelihoods in Cameroon: from Indifference to Alliance?	2012	Y	SHC	2017-09-28	Y		YES
Li F ; Chen H ; Li W ;	Socioeconomic impact of forest eco-compensation mechanism in Hainan province of China	2007	Y	SHC	2017-09-28	Y		YES
Bauch Simone C; Sills Erin O; Pattanayak Subhrendu K;	Have We Managed to Integrate Conservation and Development? ICDP Impacts in the Brazilian Amazon	2014	Y	SHC	2017-09-29	Y		YES
Bellin F ;	Smallholder tree crops in Sierra Leone: impacts on food consumption and nutrition	1994	Y	SHC	2017-09-29	Y		YES
Broadbent Eben N; Zambrano Angelica M Almeyda; Dirzo Rodolfo ; Durham William H; Driscoll Laura ; Gallagher Patrick ; Salters Rosalyn ; Schultz Jared ; Colmenares Angelica ; Randolph Shannon G;	The effect of land use change and ecotourism on biodiversity: a case study of Manuel Antonio, Costa Rica, from 1985 to 2008	2012	Y	SHC	2017-09-29	Y		YES
Bullock Allison ; King Brian ;	Evaluating China’s Slope Land Conversion Program as sustainable management in Tianquan and Wuqi Counties	2011	Y	SHC	2017-09-29	Y		YES
Edmonds ; V Eric ;	Government-initiated community resource management and local resource extraction from Nepal's forests	2002	Y	SHC	2017-09-29	Y		YES
Ghosh Nilanjan ; Uddhammar Emil ;	Tiger, Lion, and Human Life in the Heart of Wilderness: Impacts of Institutional Tourism on Development and Conservation in East Africa and India	2013	Y	SHC	2017-09-29	Y		YES
Almeyda Angelica M; Broadbent Eben N; Wyman Miriam S; Durham William H;	Ecotourism impacts in the Nicoya Peninsula, Costa Rica	2010	Y	SHC	2014	Y		YES	*
Andam Kwaw S; Ferraro Paul J; Sims Katharine R E; Healy Andrew ; Holland Margaret B;	Protected areas reduced poverty in Costa Rica and Thailand.	2010	Y	SHC	2014	Y		YES	*
Baral Nabin ; Stern Marc J;	A comparative study of two community-based conservation models in Nepal	2011	Y	SHC	2014	Y		YES	*
Bowler Diana E; Buyung-Ali Lisette M; Healey John R; Jones Julia P G; Knight Teri M; Pullin Andrew S;	Does community forest management provide global environmental benefits and improve local welfare?	2012	Y	SHC	2014	Y	SYSTEMATIC REVIEW	YES	*
Brooks Jeremy ; Waylen Kerry Ann; Mulder Monique Borgerhoff;	Assessing community-based conservation projects: A systematic review and multilevel analysis of attitudinal, behavioral, ecological, and economic outcomes	2013	Y	SHC	2014	Y	SYSTEMATIC REVIEW	YES	*
Chowdhury Mohammad ; Gudmundsson Chloe ; Izumiyama Shigeyuki ; Koike Masao ; Nazia Nahid ; Rana Md ; Mukul Sharif ; Muhammed Nur ; Redowan Mohammed ;	Community attitudes toward forest conservation programs through collaborative protected area management in Bangladesh	2014	Y	SHC, KM	2017-02-02	Y		YES	*
Chowdhury MSH ; Koike M ; Izumiyama S ;	Impact of Co-management on Rural Development: Evidence from Community Survey in and Around Rema-Kalenga Wildlife Sanctuary	2014	Y	SHC, KM	2017-02-02	Y		YES	*
Coleman E A; Mwangi E ;	Women's participation in forest management: a cross-country analysis	2013	Y	SHC, KM	2017-02-02	Y		YES	*
Coleman Eric A; Fleischman Forrest D;	Comparing Forest Decentralization and Local Institutional Change in Bolivia, Kenya, Mexico, and Uganda	2012	Y	SHC, KM	2017-02-02	Y		YES	*
Das Nimai ;	Women's dependence on forest and participation in forestry: A case study of joint forest management programme in West Bengal	2011	Y	SHC, KM	2017-02-02	Y		YES	*
Derkyi Mercy ; Ros-Tonen Mirjam a F; Kyereh Boateng ; Dietz Ton ;	Emerging forest regimes and livelihoods in the Tano Offin Forest Reserve, Ghana: Implications for social safeguards	2013	Y	JE, SHC	2014	Y		YES	*
Dhakal B ; Bigsby H ; Cullen R ;	Forests for food security and livelihood sustainability: Policy problems and opportunities for small farmers in Nepal	2011	Y	SHC, KM	2017-02-02	Y		YES	*
Dhakal Bhubaneswor ; Bigsby Hugh R; Cullen Ross ;	The link between community forestry policies and poverty and unemployment in rural Nepal	2007	Y	SHC, KM	2017-02-02	Y		YES	*
Djamhuri T L;	Community participation in a social forestry program in Central Java, Indonesia: The effect of incentive structure and social capital	2008	Y	SHC, KM	2017-02-02	Y		YES	*
Duchelle A E; Cronkleton P ; Kainer K A; Guanacoma G ; Gezan S ;	Resource theft in tropical forest communities: Implications for Nontimber management, livelihoods, and conservation	2011	Y	SHC, KM	2017-02-02	Y		YES	*
Fasse A ; Winter E ; Grote U ;	Bioenergy and rural development: The role of agroforestry in a Tanzanian village economy	2014	Y	SHC, KM	2017-02-02	Y		YES	*
Faße Anja ; Grote Ulrike ;	The economic relevance of sustainable agroforestry practices — An empirical analysis from Tanzania	2013	Y	SHC, KM	2017-02-02	Y		YES	*
Ferraro Paul J; Hanauer Merlin M;	Quantifying causal mechanisms to determine how protected areas affect poverty through changes in ecosystem services and infrastructure	2014	Y	SHC, KM	2017-02-02	Y		YES	*
Lawrence A ; Ambrose-Oji B ;	Beauty, friends, power, money: navigating the impacts of community woodlands	2015	Y	SHC	2014	Y	SYSTEMATIC REVIEW	YES	*
Leclercq B ;	Links Between Conservation/Development Projects and International Conventions and Programs : The Southeastern Rainforest of Madagascar	2010	Y	MCM, KM	2017-02-02	Y		YES	*
Leisher Craig ; Temsah Gheda ; Booker Francesca ; Day Michael ; Samberg Leah ; Prosnitz Debra ; Agarwal Bina ; Matthews Elizabeth ; Roe Dilys ; Russell Diane ; Sunderland Terry ; Wilkie David ;	Does the gender composition of forest and fishery management groups affect resource governance and conservation outcomes? A systematic map	2016	Y	SHC	2014	Y	SYSTEMATIC REVIEW	YES	*
Liu Tianjun ; Liu Can ; Liu Hao ; Wang Sen ; Rong Qingjiao ; Zhu Wenqing ;	Did the Key Priority Forestry Programs affect income inequality in rural China?	2014	Y	SHC	2014	Y		YES	*
Machado F ; Gordon J ;	Extracting value from the forest Lessons for landscapes and livelihoods from the Acre landscape, Brazil	2012	Y	SHC	2014	Y		YES	*
Marsh R ;	Building on traditional gardening to improve household food security	1998	Y	SHC	2014	Y		YES	*
Martin Adrian ; Gross-Camp Nicole ; Kebede Bereket ; McGuire Shawn ;	Measuring effectiveness, efficiency and equity in an experimental Payments for Ecosystem Services trial	2014	Y	SHC	2014	Y		YES	*
Mazunda J ; Shively G ;	Measuring the forest and income impacts of forest user group participation under Malawi's Forest Co-management Program	2015	Y	SHC	2014	Y		YES	*
Mbuvi MTE ; Musyoki JK ; Ongugo PO ;	Equity Mechanisms in Traditional Forest Management Systems: A Case Study of Loita Forest in Kenya	2015	Y	SHC	2014	Y		YES	*
McDougall Cynthia L; Leeuwis Cees ; Bhattarai Tara ; Maharjan Manik R; Jiggins Janice ;	Engaging women and the poor: adaptive collaborative governance of community forests in Nepal	2013	Y	SHC	2014	Y		YES	*
Meaza H ; Tsegaye D ; Nyssen J ;	Allocation of degraded hillsides to landless farmers and improved livelihoods in Tigray, Ethiopia	2016	Y	SHC	2014	Y		YES	*
Menton Mary C S; Merry Frank D; Lawrence Anna ; Brown Nick ;	Company-Community Logging Contracts in Amazonian Settlements: Impacts on Livelihoods and NTFP Harvests	2009	Y	SHC	2014	Y		YES	*
Miranda Juan José; Corral Leonardo ; Blackman Allen ; Asner Gregory ; Lima Eirivelthon ;	Effects of Protected Areas on Forest Cover Change and Local Communities: Evidence from the Peruvian Amazon	2016	Y	KM	2017-02-02	Y		YES	*
Miteva Daniela A; Loucks Colby J; Pattanayak Subhrendu K;	Social and Environmental Impacts of Forest Management Certification in Indonesia	2015	Y	SHC	2014	Y		YES	*
Mohammed AJ ; Inoue M ;	Linking outputs and outcomes from devolved forest governance using a Modified Actor-Power-Accountability Framework (MAPAF): Case study from Chilimo forest, Ethiopia	2014	Y	SHC	2014	Y		YES	*
Morsello Carla ; Ruiz-Mallén Isabel ; Diaz Maria Dolores Montoya; Reyes-García Victoria ;	The Effects of Processing Non-Timber Forest Products and Trade Partnerships on People's Well-Being and Forest Conservation in Amazonian Societies	2012	Y	SHC	2014	Y		YES	*
Mutune JM ; Lund JF ;	Unpacking the impacts of 'participatory' forestry policies: Evidence from Kenya	2016	Y	SHC	2014	Y		YES	*
Naidu S C;	Access to benefits from forest commons in the Western Himalayas	2011	Y	SHC	2014	Y		YES	*
Neupane R P; Thapa G B;	Impact of agroforestry intervention on soil fertility and farm income under the subsistence farming system of the middle hills, Nepal	2001	Y	SHC	2014	Y		YES	*
Pagdee A ; Kim Y S; Daugherty P J;	What makes community forest management successful: A meta-study from community forests throughout the world	2006	Y	SHC	2014	Y	REVIEW	YES	*
Pailler S ; Naidoo R ; Burgess ND ; Freeman OE ; Fisher B ;	Impacts of Community-Based Natural Resource Management on Wealth, Food Security and Child Health in Tanzania	2015	Y	SHC	2014	Y		YES	*
Pender John Suyanto, John Kerr, Edward Kato;	Impacts of the Hutan Kamasyarakatan Social Forestry Program in the Sumberjaya Watershed , West Lampung District of Sumatra , Indonesia	2008	Y	SHC	2014	Y		YES	*
Persha L ; Andersson K ;	Elite capture risk and mitigation in decentralized forest governance regimes	2014	Y	SHC	2014	Y		YES	*
Pokharel R K; Tiwari K R;	Good governance assessment in Nepal's community forestry	2013	Y	SHC	2014	Y		YES	*
Pullin A ; Bangpan M ; Dalrymple S ; Dickson K ; Haddaway N R; Healey J R;	Human well-being impacts of terrestrial protected areas	2013	Y	SHC	2014	Y	SYSTEMATIC REVIEW	YES	*
Puri J, Nath M, Bhatia R, Glew L	Examining the evidence base for forest conservation interventions	2016	Y	SHC	2014	Y	SYSTEMATIC REVIEW	YES	*
Reyes T ; Quiroz R ; Msikula S ;	Socio-economic comparison between traditional and improved cultivation methods in agroforestry systems, East Usambara Mountains, Tanzania	2005	Y	SHC	2014	Y		YES	*
Rico Garcia-Amado ; Luis ; Ruiz Perez ; Manuel ; Reyes Escutia ; Felipe ; Barrasa Garcia ; Sara ; Contreras Mejia ; Elsa ;	Efficiency of Payments for Environmental Services: Equity and additionality in a case study from a Biosphere Reserve in Chiapas, Mexico	2011	Y	SHC	2014	Y		YES	*
Riddell Michael ;	Assessing the Impacts of Conservation and Commercial Forestry on Livelihoods in Northern Republic of Congo	2013	Y	SHC	2014	Y		YES	*
Riehl Brianne ; Zerriffi Hisham ; Naidoo Robin ;	Effects of Community-Based Natural Resource Management on Household Welfare in Namibia	2015	Y	SHC	2014	Y		YES	*
Samii Cyrus ; Lisiecki Matthew ; Kulkarni Parashar ; Paler Laura ; Chavis Larry ;	Effects of Payment for Environmental Services (PES) on Deforestation and Poverty in Low and Middle Income Countries : a Systematic Review	2014	Y	SHC	2014	Y	Systematic review	YES	*
Samii Cyrus ; Paler L ;	Effects of Decentralized Forest Management (DFM) on Deforestation and Poverty in Low and Middle Income Countries: A Systematic Review	2014	Y	SHC	2014	Y	Systematic review	YES	*
Shackleton S ; Campbell B ; Lotz-Sisitka H ; Shackleton C ;	Links between the local trade in natural products, livelihoods and poverty alleviation in a semi-arid region of South Africa	2008	Y	SHC	2014	Y		YES	*
Singh S ; Singh S ; Bawa SS ; Sharma SC ; Salaria A ;	Impact of Makowal type water system on crop productivity in Shivalik foothills of India	2015	Y	SHC	2014	Y		YES	*
Snilsveit B, Stevenson J, Villar P, Eyers J, Harvey C, Panfil S, Puri J, McKinnon MC	Land-use change and forestry programmes evidence on the effects on greenhouse gas emissions and food security	2016	Y	SHC	2014	Y	SYSTEMATIC REVIEW	YES	*
Spiteri Arian ; Nepal Sanjay K;	Evaluating Local Benefits from Conservation in Nepal’s Annapurna Conservation Area	2008	Y	SHC	2014	Y		YES	*
Subedi MR ; Timilsina YP ;	Evidence of User Participation in Community Forest Management in the Mid-hills of Nepal: A Case of Rule Making and Implementation	2016	Y	SHC	2014	Y		YES	*
Tchoundjeu Z ; Degrande A ; Leakey R R. B; Nimino G ; Kemajou E ; Asaah E ; Facheux C ; Mbile P ; Mbosso C ; Sado T ; Tsobeng A ;	Impacts of participatory tree domestication on farmer livelihoods in West and Central Africa	2010	Y	SHC	2014	Y		YES	*
van Vliet ; N ; Mertz O ; Heinimann A ; Langanke T ; Pascual U ; Schmook B ; Adams C ; Schmidt-Vogt D ; Messerli P ; Leisz S ; Castella J C; Jorgensen L ; Birch-Thomsen T ; Hett C ; Bruun T B; Ickowitz A ; Vu K C; Yasuyuki K ; Fox J ; Padoch C ; Dressler W ; Ziegler A D;	Trends, drivers and impacts of changes in swidden cultivation in tropical forest-agriculture frontiers: A global assessment	2012	Y	SHC	2014	Y	REVIEW	YES	*
Vyamana V G;	Participatory Forest Management in the Eastern Arc Mountains of Tanzania: Who Benefits?	2009	Y	SHC	2014	Y		YES	*
Wang C M; Ouyang H ; Shao B ; Maclaren V ; Tian Y Q;	Assessment of the sustainability of grain for green in northeast China	2005	Y	SHC	2014	Y		YES	*
Wang CH ; Wen YL ; Wu J ;	The Socio-economic Effect of the Reform of the Collective Forest Rights System in Southern China: A Case of Tonggu County, Jiangxi Province	2014	Y	SHC	2014	Y		YES	*
Weber Jeremy G; Sills Erin O; Bauch Simone ; Pattanayak Subhrendu K;	Do ICDPs Work? An Empirical Evaluation of Forest-Based Microenterprises in the Brazilian Amazon	2011	Y	MCM, KM	2017-02-02	Y		YES	*
Yin RS ; Liu C ; Zhao MJ ; Yao SB ; Liu H ;	The implementation and impacts of China's largest payment for ecosystem services program as revealed by longitudinal household data	2014	Y	SHC	2014	Y		YES	*
